# Supplementary material for: In Silico Characterization and Phylogenetic Distribution of Extracellular Matrix Components in the Model Rhizobacteria Pseudomonas fluorescens F113 and Other Pseudomonads
Source: MDPI journal article supplement (doi:10.3390/microorganisms8111740), 2020-11-06
Supplement: s1 [file s1]

**Supplementary Table 6. *Pseudomonads* containing the fimbrial low-molecular-weight protein (*flp*)/tight adherence (*tad*) and/or *Pseudomonas* acidic polysaccharide (*pap*) biosynthetic clusters: the rhizosphere lifestyle of the different taxa is highlighted as PGPR (B) or pathogenic (P) behavior according to previous reports in the literature.**

| Species                       | Subps/Strain/<br>Pv/Isolate   | Flp/Tad<br>Type A | Flp/Tad<br>Type B | Pap | Plant-<br>bacteria<br>relationship | Reference |
|-------------------------------|-------------------------------|-------------------|-------------------|-----|------------------------------------|-----------|
| <i>Pseudomonas aeruginosa</i> | PSE305                        | +                 | -                 | -   | /                                  | /         |
| <i>Pseudomonas aeruginosa</i> | CCBH4851                      | +                 | -                 | -   | /                                  | /         |
| <i>Pseudomonas aeruginosa</i> | F22031                        | +                 | -                 | -   | /                                  | /         |
| <i>Pseudomonas aeruginosa</i> | NCGM1984                      | +                 | -                 | -   | /                                  | /         |
| <i>Pseudomonas aeruginosa</i> | NCGM1900                      | +                 | -                 | -   | /                                  | /         |
| <i>Pseudomonas aeruginosa</i> | Carb01 63                     | +                 | -                 | -   | /                                  | /         |
| <i>Pseudomonas aeruginosa</i> | S04 90                        | +                 | -                 | -   | /                                  | /         |
| <i>Pseudomonas aeruginosa</i> | F9676                         | +                 | -                 | -   | /                                  | /         |
| <i>Pseudomonas aeruginosa</i> | PA1RG                         | +                 | -                 | -   | /                                  | /         |
| <i>Pseudomonas aeruginosa</i> | VA-134                        | +                 | -                 | -   | /                                  | /         |
| <i>Pseudomonas aeruginosa</i> | 38089 59                      | +                 | -                 | -   | /                                  | /         |
| <i>Pseudomonas aeruginosa</i> | S86968                        | +                 | -                 | -   | /                                  | /         |
| <i>Pseudomonas aeruginosa</i> | T38079                        | +                 | -                 | -   | /                                  | /         |
| <i>Pseudomonas aeruginosa</i> | T52373                        | +                 | -                 | -   | /                                  | /         |
| <i>Pseudomonas aeruginosa</i> | T63266                        | +                 | -                 | -   | /                                  | /         |
| <i>Pseudomonas aeruginosa</i> | W16407                        | +                 | -                 | -   | /                                  | /         |
| <i>Pseudomonas aeruginosa</i> | W36662                        | +                 | -                 | -   | /                                  | /         |
| <i>Pseudomonas aeruginosa</i> | W60856                        | +                 | -                 | -   | /                                  | /         |
| <i>Pseudomonas aeruginosa</i> | F23197                        | +                 | -                 | -   | /                                  | /         |
| <i>Pseudomonas aeruginosa</i> | F30658                        | +                 | -                 | -   | /                                  | /         |
| <i>Pseudomonas aeruginosa</i> | H5708                         | +                 | -                 | -   | /                                  | /         |
| <i>Pseudomonas aeruginosa</i> | H27930                        | +                 | -                 | -   | /                                  | /         |
| <i>Pseudomonas aeruginosa</i> | H47921                        | +                 | -                 | -   | /                                  | /         |
| <i>Pseudomonas aeruginosa</i> | M1608                         | +                 | -                 | -   | /                                  | /         |
| <i>Pseudomonas aeruginosa</i> | M37351                        | +                 | -                 | -   | /                                  | /         |
| <i>Pseudomonas aeruginosa</i> | USDA-ARS-<br>USMARC-<br>41639 | +                 | -                 | -   | /                                  | /         |
| <i>Pseudomonas aeruginosa</i> | X78812                        | +                 | -                 | -   | /                                  | /         |
| <i>Pseudomonas aeruginosa</i> | F9670                         | +                 | -                 | -   | /                                  | /         |
| <i>Pseudomonas aeruginosa</i> | NCGM257                       | +                 | -                 | -   | /                                  | /         |
| <i>Pseudomonas aeruginosa</i> | 8380                          | +                 | -                 | -   | /                                  | /         |
| <i>Pseudomonas aeruginosa</i> | IOMTU 133                     | +                 | -                 | -   | /                                  | /         |
| <i>Pseudomonas aeruginosa</i> | F63912                        | +                 | -                 | -   | /                                  | /         |
| <i>Pseudomonas aeruginosa</i> | N17-1                         | +                 | -                 | -   | /                                  | /         |
| <i>Pseudomonas aeruginosa</i> | BAMCPA07-<br>48               | +                 | -                 | -   | /                                  | /         |
| <i>Pseudomonas aeruginosa</i> | PA121617                      | +                 | -                 | -   | /                                  | /         |
| <i>Pseudomonas aeruginosa</i> | ATCC 27853                    | +                 | -                 | -   | /                                  | /         |
| <i>Pseudomonas aeruginosa</i> | PA D1                         | +                 | -                 | -   | /                                  | /         |

|                               |                  |   |   |   |   |   |
|-------------------------------|------------------|---|---|---|---|---|
| <i>Pseudomonas aeruginosa</i> | PA D2            | + | - | - | / | / |
| <i>Pseudomonas aeruginosa</i> | PA D9            | + | - | - | / | / |
| <i>Pseudomonas aeruginosa</i> | PA D16           | + | - | - | / | / |
| <i>Pseudomonas aeruginosa</i> | PA D22           | + | - | - | / | / |
| <i>Pseudomonas aeruginosa</i> | PA D25           | + | - | - | / | / |
| <i>Pseudomonas aeruginosa</i> | DN1              | + | - | - | / | / |
| <i>Pseudomonas aeruginosa</i> | PA D5            | + | - | - | / | / |
| <i>Pseudomonas aeruginosa</i> | PA D21           | + | - | - | / | / |
| <i>Pseudomonas aeruginosa</i> | ATCC 15692       | + | - | - | / | / |
| <i>Pseudomonas aeruginosa</i> | PA1088           | + | - | - | / | / |
| <i>Pseudomonas aeruginosa</i> | PA8281           | + | - | - | / | / |
| <i>Pseudomonas aeruginosa</i> | PA11803          | + | - | - | / | / |
| <i>Pseudomonas aeruginosa</i> | PA7790           | + | - | - | / | / |
| <i>Pseudomonas aeruginosa</i> | B10W             | + | - | - | / | / |
| <i>Pseudomonas aeruginosa</i> | Paer4 119        | + | - | - | / | / |
| <i>Pseudomonas aeruginosa</i> | SCVFeb           | + | - | - | / | / |
| <i>Pseudomonas aeruginosa</i> | SCVJan           | + | - | - | / | / |
| <i>Pseudomonas aeruginosa</i> | NHmuc            | + | - | - | / | / |
| <i>Pseudomonas aeruginosa</i> | PA 154197        | + | - | - | / | / |
| <i>Pseudomonas aeruginosa</i> | RIVM-<br>EMC2982 | + | - | - | / | / |
| <i>Pseudomonas aeruginosa</i> | E6130952         | + | - | - | / | / |
| <i>Pseudomonas aeruginosa</i> | PASGNDM69<br>9   | + | - | - | / | / |
| <i>Pseudomonas aeruginosa</i> | PASGNDM34<br>5   | + | - | - | / | / |
| <i>Pseudomonas aeruginosa</i> | M8A1             | + | - | - | / | / |
| <i>Pseudomonas aeruginosa</i> | M8A4             | + | - | - | / | / |
| <i>Pseudomonas aeruginosa</i> | M28A1            | + | - | - | / | / |
| <i>Pseudomonas aeruginosa</i> | Pb18             | + | - | - | / | / |
| <i>Pseudomonas aeruginosa</i> | Pa124            | + | - | - | / | / |
| <i>Pseudomonas aeruginosa</i> | Pa58             | + | - | - | / | / |
| <i>Pseudomonas aeruginosa</i> | Pa84             | + | - | - | / | / |
| <i>Pseudomonas aeruginosa</i> | Pa127            | + | - | - | / | / |
| <i>Pseudomonas aeruginosa</i> | Pa1242           | + | - | - | / | / |
| <i>Pseudomonas aeruginosa</i> | PA83             | + | - | - | / | / |
| <i>Pseudomonas aeruginosa</i> | L10              | + | - | - | / | / |
| <i>Pseudomonas aeruginosa</i> | Ocean-1155       | + | - | - | / | / |
| <i>Pseudomonas aeruginosa</i> | Ocean-1175       | + | - | - | / | / |
| <i>Pseudomonas aeruginosa</i> | PPF-1            | + | - | - | / | / |
| <i>Pseudomonas aeruginosa</i> | 97               | + | - | - | / | / |
| <i>Pseudomonas aeruginosa</i> | PA 150577        | + | - | - | / | / |
| <i>Pseudomonas aeruginosa</i> | 12939            | + | - | - | / | / |
| <i>Pseudomonas aeruginosa</i> | PB369            | + | - | - | / | / |
| <i>Pseudomonas aeruginosa</i> | PB368            | + | - | - | / | / |
| <i>Pseudomonas aeruginosa</i> | PB353            | + | - | - | / | / |
| <i>Pseudomonas aeruginosa</i> | PB354            | + | - | - | / | / |

|                               |                 |   |   |   |   |   |
|-------------------------------|-----------------|---|---|---|---|---|
| <i>Pseudomonas aeruginosa</i> | PB350           | + | - | - | / | / |
| <i>Pseudomonas aeruginosa</i> | PB367           | + | - | - | / | / |
| <i>Pseudomonas aeruginosa</i> | F5677           | + | - | - | / | / |
| <i>Pseudomonas aeruginosa</i> | AR 360          | + | - | - | / | / |
| <i>Pseudomonas aeruginosa</i> | AR 354          | + | - | - | / | / |
| <i>Pseudomonas aeruginosa</i> | AR 353          | + | - | - | / | / |
| <i>Pseudomonas aeruginosa</i> | AR 230          | + | - | - | / | / |
| <i>Pseudomonas aeruginosa</i> | AR 356          | + | - | - | / | / |
| <i>Pseudomonas aeruginosa</i> | AR 357          | + | - | - | / | / |
| <i>Pseudomonas aeruginosa</i> | AR 95           | + | - | - | / | / |
| <i>Pseudomonas aeruginosa</i> | CR1             | + | - | - | / | / |
| <i>Pseudomonas aeruginosa</i> | MRSN12280       | + | - | - | / | / |
| <i>Pseudomonas aeruginosa</i> | WCHPA07501<br>9 | + | - | - | / | / |
| <i>Pseudomonas aeruginosa</i> | JB2             | + | - | - | / | / |
| <i>Pseudomonas aeruginosa</i> | AR444           | + | - | - | / | / |
| <i>Pseudomonas aeruginosa</i> | AR441           | + | - | - | / | / |
| <i>Pseudomonas aeruginosa</i> | AR445           | + | - | - | / | / |
| <i>Pseudomonas aeruginosa</i> | AR442           | + | - | - | / | / |
| <i>Pseudomonas aeruginosa</i> | AR439           | + | - | - | / | / |
| <i>Pseudomonas aeruginosa</i> | AR 440          | + | - | - | / | / |
| <i>Pseudomonas aeruginosa</i> | AR 443          | + | - | - | / | / |
| <i>Pseudomonas aeruginosa</i> | AR 446          | + | - | - | / | / |
| <i>Pseudomonas aeruginosa</i> | CCUG 70744      | + | - | - | / | / |
| <i>Pseudomonas aeruginosa</i> | AR 110          | + | - | - | / | / |
| <i>Pseudomonas aeruginosa</i> | K34-7           | + | - | - | / | / |
| <i>Pseudomonas aeruginosa</i> | AR 460          | + | - | - | / | / |
| <i>Pseudomonas aeruginosa</i> | AR 455          | + | - | - | / | / |
| <i>Pseudomonas aeruginosa</i> | AR 458          | + | - | - | / | / |
| <i>Pseudomonas aeruginosa</i> | PA34            | + | - | - | / | / |
| <i>Pseudomonas aeruginosa</i> | Y89             | + | - | - | / | / |
| <i>Pseudomonas aeruginosa</i> | Y82             | + | - | - | / | / |
| <i>Pseudomonas aeruginosa</i> | Y31             | + | - | - | / | / |
| <i>Pseudomonas aeruginosa</i> | Y71             | + | - | - | / | / |
| <i>Pseudomonas aeruginosa</i> | PABL048         | + | - | - | / | / |
| <i>Pseudomonas aeruginosa</i> | PABL012         | + | - | - | / | / |
| <i>Pseudomonas aeruginosa</i> | PABL017         | + | - | - | / | / |
| <i>Pseudomonas aeruginosa</i> | 24Pae112        | + | - | - | / | / |
| <i>Pseudomonas aeruginosa</i> | N15-01092       | + | - | - | / | / |
| <i>Pseudomonas aeruginosa</i> | AR 111          | + | - | - | / | / |
| <i>Pseudomonas aeruginosa</i> | BA7823          | + | - | - | / | / |
| <i>Pseudomonas aeruginosa</i> | 268             | + | - | - | / | / |
| <i>Pseudomonas aeruginosa</i> | 6762            | + | - | - | / | / |
| <i>Pseudomonas aeruginosa</i> | SP4528          | + | - | - | / | / |
| <i>Pseudomonas aeruginosa</i> | BH9             | + | - | - | / | / |
| <i>Pseudomonas aeruginosa</i> | H26027          | + | - | - | / | / |
| <i>Pseudomonas aeruginosa</i> | H25883          | + | - | - | / | / |

|                               |                 |   |   |   |   |   |
|-------------------------------|-----------------|---|---|---|---|---|
| <i>Pseudomonas aeruginosa</i> | H26023          | + | - | - | / | / |
| <i>Pseudomonas aeruginosa</i> | FDAARGOS 532    | + | - | - | / | / |
| <i>Pseudomonas aeruginosa</i> | FDAARGOS 571    | + | - | - | / | / |
| <i>Pseudomonas aeruginosa</i> | FDAARGOS 501    | + | - | - | / | / |
| <i>Pseudomonas aeruginosa</i> | FDAARGOS 505    | + | - | - | / | / |
| <i>Pseudomonas aeruginosa</i> | FDAARGOS 570    | + | - | - | / | / |
| <i>Pseudomonas aeruginosa</i> | IMP-13          | + | - | - | / | / |
| <i>Pseudomonas aeruginosa</i> | SP4371          | + | - | - | / | / |
| <i>Pseudomonas aeruginosa</i> | SP2230          | + | - | - | / | / |
| <i>Pseudomonas aeruginosa</i> | B14130          | + | - | - | / | / |
| <i>Pseudomonas aeruginosa</i> | B17932          | + | - | - | / | / |
| <i>Pseudomonas aeruginosa</i> | GIMC5015 PAKB6  | + | - | - | / | / |
| <i>Pseudomonas aeruginosa</i> | SP4527          | + | - | - | / | / |
| <i>Pseudomonas aeruginosa</i> | LW              | + | - | - | / | / |
| <i>Pseudomonas aeruginosa</i> | PAO1161         | + | - | - | / | / |
| <i>Pseudomonas aeruginosa</i> | 1334 14         | + | - | - | / | / |
| <i>Pseudomonas aeruginosa</i> | E80             | + | - | - | / | / |
| <i>Pseudomonas aeruginosa</i> | PA-VAP-3        | + | - | - | / | / |
| <i>Pseudomonas aeruginosa</i> | PA-VAP-1        | + | - | - | / | / |
| <i>Pseudomonas aeruginosa</i> | PA-VAP-2        | + | - | - | / | / |
| <i>Pseudomonas aeruginosa</i> | PA-VAP-4        | + | - | - | / | / |
| <i>Pseudomonas aeruginosa</i> | AES1M           | + | - | - | / | / |
| <i>Pseudomonas aeruginosa</i> | AES1R           | + | - | - | / | / |
| <i>Pseudomonas aeruginosa</i> | AJ D 2          | + | - | - | / | / |
| <i>Pseudomonas aeruginosa</i> | PRD-10          | + | - | - | / | / |
| <i>Pseudomonas aeruginosa</i> | PA298           | + | - | - | / | / |
| <i>Pseudomonas aeruginosa</i> | FDAARGOS 767    | + | - | - | / | / |
| <i>Pseudomonas aeruginosa</i> | FDAARGOS 610    | + | - | - | / | / |
| <i>Pseudomonas aeruginosa</i> | AZPAE15042      | + | - | - | / | / |
| <i>Pseudomonas aeruginosa</i> | 60503           | + | - | - | / | / |
| <i>Pseudomonas aeruginosa</i> | A681            | + | - | - | / | / |
| <i>Pseudomonas aeruginosa</i> | 519119          | + | - | - | / | / |
| <i>Pseudomonas aeruginosa</i> | 243931          | + | - | - | / | / |
| <i>Pseudomonas aeruginosa</i> | SCAID WND2-2019 | + | - | - | / | / |
| <i>Pseudomonas aeruginosa</i> | SCAID WND1-2019 | + | - | - | / | / |
| <i>Pseudomonas aeruginosa</i> | C79             | + | - | - | / | / |
| <i>Pseudomonas aeruginosa</i> | IMP67           | + | - | - | / | / |
| <i>Pseudomonas aeruginosa</i> | IMP68           | + | - | - | / | / |
| <i>Pseudomonas aeruginosa</i> | IMP66           | + | - | - | / | / |
| <i>Pseudomonas aeruginosa</i> | CCUG 51971      | + | - | - | / | / |

|                               |                     |   |   |   |   |   |
|-------------------------------|---------------------|---|---|---|---|---|
| <i>Pseudomonas aeruginosa</i> | HOU1                | + | - | - | / | / |
| <i>Pseudomonas aeruginosa</i> | GIMC5001<br>PAT-23  | + | - | - | / | / |
| <i>Pseudomonas aeruginosa</i> | GIMC5002<br>PAT-169 | + | - | - | / | / |
| <i>Pseudomonas aeruginosa</i> | E90                 | + | - | - | / | / |
| <i>Pseudomonas aeruginosa</i> | PA59                | + | - | - | / | / |
| <i>Pseudomonas aeruginosa</i> | CFSAN084950         | + | - | - | / | / |
| <i>Pseudomonas aeruginosa</i> | AG1                 | + | - | - | / | / |
| <i>Pseudomonas aeruginosa</i> | ST773               | + | - | - | / | / |
| <i>Pseudomonas aeruginosa</i> | 1811-13R031         | + | - | - | / | / |
| <i>Pseudomonas aeruginosa</i> | 1811-18R001         | + | - | - | / | / |
| <i>Pseudomonas aeruginosa</i> | T2436               | + | - | - | / | / |
| <i>Pseudomonas aeruginosa</i> | T2101               | + | - | - | / | / |
| <i>Pseudomonas aeruginosa</i> | delta6 2            | + | - | - | / | / |
| <i>Pseudomonas aeruginosa</i> | delta6 3            | + | - | - | / | / |
| <i>Pseudomonas aeruginosa</i> | delta6 4            | + | - | - | / | / |
| <i>Pseudomonas aeruginosa</i> | delta6 5            | + | - | - | / | / |
| <i>Pseudomonas aeruginosa</i> | delta6 6            | + | - | - | / | / |
| <i>Pseudomonas aeruginosa</i> | delta10             | + | - | - | / | / |
| <i>Pseudomonas aeruginosa</i> | Cas9 1              | + | - | - | / | / |
| <i>Pseudomonas aeruginosa</i> | Cas9 2              | + | - | - | / | / |
| <i>Pseudomonas aeruginosa</i> | Environ 1           | + | - | - | / | / |
| <i>Pseudomonas aeruginosa</i> | Environ 2           | + | - | - | / | / |
| <i>Pseudomonas aeruginosa</i> | YB01                | + | - | - | / | / |
| <i>Pseudomonas aeruginosa</i> | INP-43              | + | - | - | / | / |
| <i>Pseudomonas aeruginosa</i> | RD1-3               | + | - | - | / | / |
| <i>Pseudomonas aeruginosa</i> | PAO1 Orsay          | + | - | - | / | / |
| <i>Pseudomonas aeruginosa</i> | PA14Or reads        | + | - | - | / | / |
| <i>Pseudomonas aeruginosa</i> | PcyII-10            | + | - | - | / | / |
| <i>Pseudomonas aeruginosa</i> | RW109               | + | - | - | / | / |
| <i>Pseudomonas aeruginosa</i> | 1                   | + | - | - | / | / |
| <i>Pseudomonas aeruginosa</i> | paerg002            | + | - | - | / | / |
| <i>Pseudomonas aeruginosa</i> | paerg004            | + | - | - | / | / |
| <i>Pseudomonas aeruginosa</i> | paerg003            | + | - | - | / | / |
| <i>Pseudomonas aeruginosa</i> | paerg005            | + | - | - | / | / |
| <i>Pseudomonas aeruginosa</i> | paerg009            | + | - | - | / | / |
| <i>Pseudomonas aeruginosa</i> | paerg010            | + | - | - | / | / |
| <i>Pseudomonas aeruginosa</i> | paerg011            | + | - | - | / | / |
| <i>Pseudomonas aeruginosa</i> | paerg012            | + | - | - | / | / |
| <i>Pseudomonas aeruginosa</i> | NCTC11445           | + | - | - | / | / |
| <i>Pseudomonas aeruginosa</i> | NCTC12903           | + | - | - | / | / |
| <i>Pseudomonas aeruginosa</i> | NCTC13715           | + | - | - | / | / |
| <i>Pseudomonas aeruginosa</i> | NCTC10728           | + | - | - | / | / |
| <i>Pseudomonas aeruginosa</i> | NCTC13359           | + | - | - | / | / |
| <i>Pseudomonas aeruginosa</i> | NCTC13620           | + | - | - | / | / |
| <i>Pseudomonas aeruginosa</i> | PcyII-29            | + | - | - | / | / |

|                               |                                     |   |   |   |   |     |
|-------------------------------|-------------------------------------|---|---|---|---|-----|
| <i>Pseudomonas aeruginosa</i> | PcyII-40                            | + | - | - | / | /   |
| <i>Pseudomonas aeruginosa</i> | C7-25                               | + | - | - | / | /   |
| <i>Pseudomonas aeruginosa</i> | 19BR                                | + | - | - | / | /   |
| <i>Pseudomonas aeruginosa</i> | 213BR                               | + | - | - | / | /   |
| <i>Pseudomonas aeruginosa</i> | 39016                               | + | - | - | / | /   |
| <i>Pseudomonas aeruginosa</i> | B136-33                             | + | - | - | / | /   |
| <i>Pseudomonas aeruginosa</i> | c7447m                              | + | - | - | / | /   |
| <i>Pseudomonas aeruginosa</i> | C-NN2                               | + | - | - | / | /   |
| <i>Pseudomonas aeruginosa</i> | DHS01                               | + | - | - | / | /   |
| <i>Pseudomonas aeruginosa</i> | DK1 substr<br>NH57388A              | + | - | - | / | /   |
| <i>Pseudomonas aeruginosa</i> | DK2                                 | + | - | - | / | /   |
| <i>Pseudomonas aeruginosa</i> | DSM 50071<br>NBRC 12689             | + | - | - | / | /   |
| <i>Pseudomonas aeruginosa</i> | LES400                              | + | - | - | / | /   |
| <i>Pseudomonas aeruginosa</i> | LES431                              | + | - | - | / | /   |
| <i>Pseudomonas aeruginosa</i> | LESB58                              | + | - | - | / | /   |
| <i>Pseudomonas aeruginosa</i> | LESB65                              | + | - | - | / | /   |
| <i>Pseudomonas aeruginosa</i> | LESlke1                             | + | - | - | / | /   |
| <i>Pseudomonas aeruginosa</i> | LESlke4                             | + | - | - | / | /   |
| <i>Pseudomonas aeruginosa</i> | LESlke5                             | + | - | - | / | /   |
| <i>Pseudomonas aeruginosa</i> | LESlke7                             | + | - | - | / | /   |
| <i>Pseudomonas aeruginosa</i> | M18                                 | + | - | - | / | /   |
| <i>Pseudomonas aeruginosa</i> | MTB-1                               | + | - | - | / | /   |
| <i>Pseudomonas aeruginosa</i> | NCGM2 S1                            | + | - | - | / | /   |
| <i>Pseudomonas aeruginosa</i> | PA1                                 | + | - | - | / | /   |
| <i>Pseudomonas aeruginosa</i> | PA1R                                | + | - | - | / | /   |
| <i>Pseudomonas aeruginosa</i> | PA7                                 | + | - | - | / | /   |
| <i>Pseudomonas aeruginosa</i> | PA96                                | + | - | - | / | /   |
| <i>Pseudomonas aeruginosa</i> | PACS2                               | + | - | - | / | /   |
| <i>Pseudomonas aeruginosa</i> | PAK                                 | + | - | - | / | /   |
| <i>Pseudomonas aeruginosa</i> | PAO1                                | + | - | - | / | /   |
| <i>Pseudomonas aeruginosa</i> | PAO1-VE13                           | + | - | - | / | /   |
| <i>Pseudomonas aeruginosa</i> | PAO1-VE2                            | + | - | - | / | /   |
| <i>Pseudomonas aeruginosa</i> | PAO581                              | + | - | - | / | /   |
| <i>Pseudomonas aeruginosa</i> | RP73                                | + | - | - | / | /   |
| <i>Pseudomonas aeruginosa</i> | SCV20265                            | + | - | - | / | /   |
| <i>Pseudomonas aeruginosa</i> | SJTD-1                              | + | - | - | / | /   |
| <i>Pseudomonas aeruginosa</i> | UCBPP-PA14                          | + | - | - | / | /   |
| <i>Pseudomonas aeruginosa</i> | VRFP A04                            | + | - | - | / | /   |
| <i>Pseudomonas aeruginosa</i> | YL84                                | + | - | - | / | /   |
| <i>Pseudomonas amygdali</i>   | pv <i>lachrymans</i><br>NM002       | + | - | - | P | [1] |
| <i>Pseudomonas amygdali</i>   | pv <i>lachrymans</i><br>str M301315 | + | - | - | / | /   |
| <i>Pseudomonas amygdali</i>   | pv<br><i>morsprunorum</i><br>R15244 | + | - | - | / | /   |

|                                   |                                                         |   |   |   |   |      |
|-----------------------------------|---------------------------------------------------------|---|---|---|---|------|
| <i>Pseudomonas amygdali</i>       | pv <i>tabaci</i> str<br>ATCC 11528                      | + | - | - | P | [2]  |
| <i>Pseudomonas antarctica</i>     | PAMC 27494                                              | + | - | - | / | /    |
| <i>Pseudomonas antarctica</i>     | LMG 22709                                               | + | - | - | / | /    |
| <i>Pseudomonas arsenicoxydans</i> | CECT 7543                                               | + | - | + | / | /    |
| <i>Pseudomonas asplenii</i>       | ATCC 23835                                              | + | - | - | P | [3]  |
| <i>Pseudomonas azotoformans</i>   | S4                                                      | + | - | - | B | [4]  |
| <i>Pseudomonas azotoformans</i>   | F77                                                     | + | - | - | / | /    |
| <i>Pseudomonas azotoformans</i>   | P45A                                                    | + | - | - | / | /    |
| <i>Pseudomonas azotoformans</i>   | LMG 21611                                               | + | - | - | / | /    |
| <i>Pseudomonas balearica</i>      | DSM 6083<br>SP1402                                      | - | + | - | / | /    |
| <i>Pseudomonas brassicacearum</i> | DF41                                                    | - | + | - | B | [5]  |
| <i>Pseudomonas brassicacearum</i> | LBUM300                                                 | - | + | + | B | [6]  |
| <i>Pseudomonas brassicacearum</i> | L13-6-12                                                | - | + | - | B | [7]  |
| <i>Pseudomonas brassicacearum</i> | 3Re2-7                                                  | - | + | + | B | [8]  |
| <i>Pseudomonas brassicacearum</i> | S-1                                                     | - | + | + | / | /    |
| <i>Pseudomonas brassicacearum</i> | LMG 21623                                               | - | + | + | / | /    |
| <i>Pseudomonas brassicacearum</i> | subsp<br><i>brassicacearum</i><br>NFM421                | - | + | + | B | [9]  |
| <i>Pseudomonas brenneri</i>       | DSM 15294                                               | + | - | - | / | /    |
| <i>Pseudomonas cedrina</i>        | LMG 23661                                               | + | - | - | / | /    |
| <i>Pseudomonas cerasi</i>         | Sour cherry<br>Prunus<br>cerasus<br>symptomatic<br>leaf | + | - | - | P | [10] |
| <i>Pseudomonas cerasi</i>         | PL963                                                   | + | - | - | P | [10] |
| <i>Pseudomonas chlororaphis</i>   | PA23                                                    | + | + | + | B | [11] |
| <i>Pseudomonas chlororaphis</i>   | PCL1606                                                 | + | + | - | B | [12] |
| <i>Pseudomonas chlororaphis</i>   | UFB2                                                    | - | + | + | B | [13] |
| <i>Pseudomonas chlororaphis</i>   | 189                                                     | + | + | - | B | [14] |
| <i>Pseudomonas chlororaphis</i>   | Lzh-T5                                                  | + | + | + | B | [15] |
| <i>Pseudomonas chlororaphis</i>   | TAMOak81                                                | + | + | - | / | /    |
| <i>Pseudomonas chlororaphis</i>   | ATCC 17415                                              | + | + | - | / | /    |
| <i>Pseudomonas chlororaphis</i>   | Pb-St2                                                  | + | + | + | B | [16] |
| <i>Pseudomonas chlororaphis</i>   | B25                                                     | + | + | - | / | /    |
| <i>Pseudomonas chlororaphis</i>   | R47                                                     | + | + | + | B | [17] |
| <i>Pseudomonas chlororaphis</i>   | ATCC 13985                                              | + | + | + | / | /    |
| <i>Pseudomonas chlororaphis</i>   | LMG 21630                                               | + | + | + | / | /    |
| <i>Pseudomonas chlororaphis</i>   | DSM 21509                                               | + | + | + | / | /    |
| <i>Pseudomonas chlororaphis</i>   | NCTC7357                                                | + | + | + | / | /    |
| <i>Pseudomonas chlororaphis</i>   | O6                                                      | + | + | + | B | [18] |
| <i>Pseudomonas chlororaphis</i>   | subsp<br><i>aurantiaca</i> JD37                         | + | + | + | B | [19] |
| <i>Pseudomonas chlororaphis</i>   | subsp<br><i>aurantiaca</i><br>StFRB508                  | + | + | + | B | [20] |

|                                 |                                           |   |   |   |   |      |
|---------------------------------|-------------------------------------------|---|---|---|---|------|
| <i>Pseudomonas chlororaphis</i> | subsp<br><i>aurantiaca</i> M12            | + | + | + | / | /    |
| <i>Pseudomonas chlororaphis</i> | subsp<br><i>aurantiaca</i> 449            | + | + | + | / | /    |
| <i>Pseudomonas chlororaphis</i> | subsp<br><i>aurantiaca</i><br>CW2         | + | + | + | / | /    |
| <i>Pseudomonas chlororaphis</i> | subsp<br><i>aurantiaca</i> M71            | + | + | + | B | [21] |
| <i>Pseudomonas chlororaphis</i> | subsp<br><i>aurantiaca</i> K27            | + | - | + | / | /    |
| <i>Pseudomonas chlororaphis</i> | subsp<br><i>aurantiaca</i><br>PCM 2210    | + | + | + | / | /    |
| <i>Pseudomonas chlororaphis</i> | subsp<br><i>aurantiaca</i> Q16            | + | + | + | B | [22] |
| <i>Pseudomonas chlororaphis</i> | subsp<br><i>aurantiaca</i> 464            | + | + | + | / | /    |
| <i>Pseudomonas chlororaphis</i> | subsp<br><i>aurantiaca</i><br>DSM 19603   | + | + | + | / | /    |
| <i>Pseudomonas chlororaphis</i> | subsp<br><i>aurantiaca</i> ARS<br>38      | + | + | + | B | [23] |
| <i>Pseudomonas chlororaphis</i> | subsp<br><i>aurantiaca</i> zm-<br>1       | + | + | + | / | /    |
| <i>Pseudomonas chlororaphis</i> | subsp<br><i>aureofaciens</i> P2           | - | + | + | / | /    |
| <i>Pseudomonas chlororaphis</i> | subsp<br><i>aureofaciens</i><br>C50       | + | + | + | / | /    |
| <i>Pseudomonas chlororaphis</i> | subsp<br><i>aureofaciens</i> 66           | + | + | + | / | /    |
| <i>Pseudomonas chlororaphis</i> | subsp<br><i>aureofaciens</i><br>ChPhzS23  | - | - | + | / | /    |
| <i>Pseudomonas chlororaphis</i> | subsp<br><i>aureofaciens</i><br>ChPhzS24  | + | + | + | / | /    |
| <i>Pseudomonas chlororaphis</i> | subsp<br><i>aureofaciens</i><br>ChPhzTR36 | + | + | + | / | /    |
| <i>Pseudomonas chlororaphis</i> | subsp<br><i>aureofaciens</i><br>DSM 6698  | + | + | + | / | /    |
| <i>Pseudomonas chlororaphis</i> | subsp<br><i>aureofaciens</i><br>ChPhzTR39 | - | + | + | / | /    |
| <i>Pseudomonas chlororaphis</i> | subsp<br><i>aureofaciens</i><br>ChPhzTR18 | + | + | + | / | /    |
| <i>Pseudomonas chlororaphis</i> | subsp<br><i>aureofaciens</i><br>ChPhzTR38 | + | + | + | / | /    |

|                                     |                                           |   |   |   |   |      |
|-------------------------------------|-------------------------------------------|---|---|---|---|------|
| <i>Pseudomonas chlororaphis</i>     | subsp<br><i>aureofaciens</i> 30-84        | + | + | - | B | [24] |
| <i>Pseudomonas chlororaphis</i>     | subsp<br><i>chlororaphis</i><br>DSM 50083 | + | + | - | / | /    |
| <i>Pseudomonas chlororaphis</i>     | subsp <i>piscium</i><br>ZJU60             | + | + | + | / | /    |
| <i>Pseudomonas chlororaphis</i>     | subsp <i>piscium</i><br>DSM 21509         | + | + | + | / | /    |
| <i>Pseudomonas chlororaphis</i>     | subsp <i>piscium</i><br>ATCC 17809        | + | + | + | / | /    |
| <i>Pseudomonas chlororaphis</i>     | subsp <i>piscium</i><br>ATCC 17411        | + | + | + | / | /    |
| <i>Pseudomonas chlororaphis</i>     | subsp <i>piscium</i><br>SLPH10            | + | + | + | / | /    |
| <i>Pseudomonas chlororaphis</i>     | subsp <i>piscium</i><br>DTR133            | + | + | + | / | /    |
| <i>Pseudomonas chlororaphis</i>     | subsp <i>piscium</i><br>PCL1391           | + | + | + | / | /    |
| <i>Pseudomonas chlororaphis</i>     | subsp <i>piscium</i><br>PCL1607           | + | + | + | / | /    |
| <i>Pseudomonas chlororaphis</i>     | subsp <i>piscium</i><br>ChPhzS135         | + | + | + | / | /    |
| <i>Pseudomonas chlororaphis</i>     | subsp <i>piscium</i><br>ChPhzS140         | + | + | + | / | /    |
| <i>Pseudomonas chlororaphis</i>     | subsp <i>piscium</i><br>ChPhzTR44         | + | + | + | / | /    |
| <i>Pseudomonas chlororaphis</i>     | subsp <i>piscium</i><br>ToZa7             | + | + | + | / | /    |
| <i>Pseudomonas cichorii</i>         | JBC1                                      | + | - | - | P | [25] |
| <i>Pseudomonas coronafaciens</i>    | pv <i>oryzae</i> str 16                   | + | - | - | P | [26] |
| <i>Pseudomonas corrugata</i>        | RM1-1-4                                   | - | + | + | B | [27] |
| <i>Pseudomonas corrugata</i>        | LMG 2172                                  | - | + | + | P | [28] |
| <i>Pseudomonas cremoricolorata</i>  | ND07                                      | - | - | + | / | /    |
| <i>Pseudomonas entomophila</i>      | 2014                                      | + | - | - | / | /    |
| <i>Pseudomonas entomophila</i>      | 1257                                      | + | - | - | / | /    |
| <i>Pseudomonas entomophila</i>      | L48 L48                                   | + | - | - | / | /    |
| <i>Pseudomonas extremorientalis</i> | LMG 19695                                 | + | - | - | / | /    |
| <i>Pseudomonas fluorescens</i>      | UK4                                       | + | - | - | / | /    |
| <i>Pseudomonas fluorescens</i>      | FW300-N2C3                                | - | + | + | / | /    |
| <i>Pseudomonas fluorescens</i>      | FW300-N2E2                                | - | + | + | / | /    |
| <i>Pseudomonas fluorescens</i>      | Pt14                                      | + | - | - | / | /    |
| <i>Pseudomonas fluorescens</i>      | 2P24                                      | - | - | + | B | [29] |
| <i>Pseudomonas fluorescens</i>      | FR1                                       | - | + | + | B | [30] |
| <i>Pseudomonas fluorescens</i>      | MS82                                      | + | - | + | B | [31] |
| <i>Pseudomonas fluorescens</i>      | NEP1                                      | + | - | + | / | /    |
| <i>Pseudomonas fluorescens</i>      | Pf275                                     | - | + | + | B | [32] |
| <i>Pseudomonas fluorescens</i>      | SIK W1                                    | + | - | - | / | /    |
| <i>Pseudomonas fluorescens</i>      | LBUM677                                   | + | - | + | B | [33] |
| <i>Pseudomonas fluorescens</i>      | ATCC 13525                                | + | - | - | / | /    |

|                                       |                               |   |   |   |   |      |
|---------------------------------------|-------------------------------|---|---|---|---|------|
| <i>Pseudomonas fluorescens</i>        | NCTC10038                     | + | - | - | / | /    |
| <i>Pseudomonas fluorescens</i>        | NCTC10783                     | + | - | - | / | /    |
| <i>Pseudomonas fluorescens</i>        | NCTC9428                      | + | - | + | / | /    |
| <i>Pseudomonas fluorescens</i>        | A506                          | + | - | - | / | /    |
| <i>Pseudomonas fluorescens</i>        | F113                          | - | + | + | B | [34] |
| <i>Pseudomonas fluorescens</i>        | NCIMB 11764                   | + | - | - | / | /    |
| <i>Pseudomonas fluorescens</i>        | Pf0-1                         | + | - | + | B | [35] |
| <i>Pseudomonas fluorescens</i>        | Q2-87                         | - | + | + | B | [36] |
| <i>Pseudomonas fluorescens</i>        | Q8r1-96                       | - | + | + | B | [37] |
| <i>Pseudomonas fluorescens</i>        | R124                          | + | - | + | / | /    |
| <i>Pseudomonas fluorescens</i>        | SBW25                         | + | - | - | B | [38] |
| <i>Pseudomonas fragi</i>              | P121                          | + | - | - | / | /    |
| <i>Pseudomonas fragi</i>              | NMC25                         | + | + | - | / | /    |
| <i>Pseudomonas fragi</i>              | NRRL B-727                    | + | + | - | / | /    |
| <i>Pseudomonas frederiksbergensis</i> | AS1                           | + | + | - | / | /    |
| <i>Pseudomonas frederiksbergensis</i> | KNU-15                        | + | + | + | / | /    |
| <i>Pseudomonas fuscovaginae</i>       | LMG 2158                      | + | - | - | P | [39] |
| <i>Pseudomonas granadensis</i>        | LMG 27940                     | + | - | + | / | /    |
| <i>Pseudomonas koreensis</i>          | D26                           | + | - | + | / | /    |
| <i>Pseudomonas koreensis</i>          | CRS05-R5                      | + | - | + | B | [40] |
| <i>Pseudomonas koreensis</i>          | LMG 21318                     | + | - | + | / | /    |
| <i>Pseudomonas kribbensis</i>         | 46-2                          | + | - | + | / | /    |
| <i>Pseudomonas lactis</i>             | SS101                         | + | - | - | / | /    |
| <i>Pseudomonas libanensis</i>         | DMSP-1                        | + | - | - | / | /    |
| <i>Pseudomonas libanensis</i>         | DSM 17149                     | + | - | - | / | /    |
| <i>Pseudomonas lini</i>               | DSM 16768                     | + | + | - | / | /    |
| <i>Pseudomonas lundensis</i>          | AU1044                        | + | - | - | / | /    |
| <i>Pseudomonas lurida</i>             | L228                          | + | - | - | / | /    |
| <i>Pseudomonas lurida</i>             | MYb11                         | + | - | - | / | /    |
| <i>Pseudomonas mandelii</i>           | LMG 21607                     | + | - | + | / | /    |
| <i>Pseudomonas mandelii</i>           | JR-1                          | + | - | + | / | /    |
| <i>Pseudomonas mediterranea</i>       | DSM 16733                     | - | + | + | / | /    |
| <i>Pseudomonas monteilii</i>          | USDA-ARS-<br>USMARC-<br>56711 | - | - | + | / | /    |
| <i>Pseudomonas moraviensis</i>        | LMG 24280                     | + | - | + | / | /    |
| <i>Pseudomonas moraviensis</i>        | R28-S                         | + | - | + | / | /    |
| <i>Pseudomonas mosselii</i>           | BS011                         | + | - | + | B | [41] |
| <i>Pseudomonas mosselii</i>           | PtA1                          | + | - | + | / | /    |
| <i>Pseudomonas orientalis</i>         | F9                            | + | - | - | B | [42] |
| <i>Pseudomonas orientalis</i>         | L1-3-08                       | + | - | - | / | /    |
| <i>Pseudomonas orientalis</i>         | R2-66-08W                     | + | - | - | B | [43] |
| <i>Pseudomonas orientalis</i>         | R4-35-08                      | + | - | - | / | /    |
| <i>Pseudomonas orientalis</i>         | 8B                            | + | - | - | / | /    |
| <i>Pseudomonas orientalis</i>         | LMG 23660                     | + | - | - | / | /    |
| <i>Pseudomonas palleroniana</i>       | MAB3                          | + | - | - | B | [44] |
| <i>Pseudomonas parafulva</i>          | CRS01-1                       | + | - | + | B | [45] |

|                                     |                                      |   |   |   |   |      |
|-------------------------------------|--------------------------------------|---|---|---|---|------|
| <i>Pseudomonas parafulva</i>        | JBCS1880                             | + | - | + | B | [46] |
| <i>Pseudomonas prosekii</i>         | LMG 26867                            | - | - | + | / | /    |
| <i>Pseudomonas protegens</i>        | H78                                  | + | - | + | B | [47] |
| <i>Pseudomonas protegens</i>        | FDAARGOS 307                         | + | - | + | / | /    |
| <i>Pseudomonas protegens</i>        | FD6                                  | + | - | + | B | [48] |
| <i>Pseudomonas protegens</i>        | pf5                                  | + | - | + | / | /    |
| <i>Pseudomonas protegens</i>        | pf5-k3                               | + | - | - | / | /    |
| <i>Pseudomonas protegens</i>        | pf5-k2                               | + | - | + | / | /    |
| <i>Pseudomonas protegens</i>        | SN15-2                               | + | - | + | B | [49] |
| <i>Pseudomonas protegens</i>        | Cab57                                | + | - | + | B | [50] |
| <i>Pseudomonas protegens</i>        | CHA0                                 | + | - | + | B | [51] |
| <i>Pseudomonas protegens</i>        | Pf-5                                 | + | - | + | B | [52] |
| <i>Pseudomonas psychrophila</i>     | LMG 24276                            | + | + | - | / | /    |
| <i>Pseudomonas putida</i>           | 1A00316                              | + | - | + | B | [53] |
| <i>Pseudomonas putida</i>           | PC2                                  | + | - | + | / | /    |
| <i>Pseudomonas putida</i>           | DRA525                               | - | + | - | / | /    |
| <i>Pseudomonas putida</i>           | KF715                                | + | - | - | / | /    |
| <i>Pseudomonas putida</i>           | IEC33019                             | + | - | - | / | /    |
| <i>Pseudomonas putida</i>           | JBC17                                | + | - | - | B | [54] |
| <i>Pseudomonas putida</i>           | NX-1                                 | + | - | + | / | /    |
| <i>Pseudomonas putida</i>           | 1290                                 | - | - | + | / | /    |
| <i>Pseudomonas putida</i>           | B1                                   | + | - | - | / | /    |
| <i>Pseudomonas putida</i>           | JYR-1                                | + | - | - | / | /    |
| <i>Pseudomonas putida</i>           | H8234                                | + | - | - | P | [55] |
| <i>Pseudomonas putida</i>           | HB3267 PC9                           | - | + | - | / | /    |
| <i>Pseudomonas putida</i>           | NBRC 14164                           | + | - | - | / | /    |
| <i>Pseudomonas putida</i>           | W619                                 | + | - | - | B | [56] |
| <i>Pseudomonas reinekei</i>         | DSM 18361                            | + | - | + | / | /    |
| <i>Pseudomonas rhodesiae</i>        | LMG 17764                            | + | - | - | / | /    |
| <i>Pseudomonas sauidiphocaensis</i> | 20 BN                                | - | - | + | / | /    |
| <i>Pseudomonas savastanoi</i>       | pv <i>phaseolicola</i> 1448A BAA-978 | + | - | - | / | /    |
| <i>Pseudomonas savastanoi</i>       | pv <i>savastanoi</i> NCPPB 3335      | + | - | - | P | [57] |
| <i>Pseudomonas simiae</i>           | WCS417                               | + | - | - | B | [58] |
| <i>Pseudomonas simiae</i>           | PCL1751                              | + | - | - | B | [59] |
| <i>Pseudomonas simiae</i>           | PICF7                                | + | - | - | / | /    |
| <i>Pseudomonas soli</i>             | SJ10                                 | + | - | + | / | /    |
| <i>Pseudomonas stutzeri</i>         | 28a24                                | - | - | + | / | /    |
| <i>Pseudomonas stutzeri</i>         | DW2-1                                | - | + | - | / | /    |
| <i>Pseudomonas stutzeri</i>         | PheN2                                | - | + | - | / | /    |
| <i>Pseudomonas stutzeri</i>         | XL272                                | - | + | - | / | /    |
| <i>Pseudomonas stutzeri</i>         | NCTC10475                            | - | + | - | / | /    |
| <i>Pseudomonas stutzeri</i>         | RCH2                                 | - | + | - | / | /    |
| <i>Pseudomonas synxantha</i>        | LBUM223                              | + | - | - | B | [60] |
| <i>Pseudomonas synxantha</i>        | KENGFT3                              | + | - | - | / | /    |

|                              |                                             |   |   |   |   |      |
|------------------------------|---------------------------------------------|---|---|---|---|------|
| <i>Pseudomonas synxantha</i> | 30B                                         | + | - | - | / | /    |
| <i>Pseudomonas synxantha</i> | 28887                                       | + | - | - | / | /    |
| <i>Pseudomonas synxantha</i> | R2-4-08W                                    | + | - | - | / | /    |
| <i>Pseudomonas synxantha</i> | R6-28-08                                    | + | - | - | / | /    |
| <i>Pseudomonas synxantha</i> | R2-54-08W                                   | + | - | - | / | /    |
| <i>Pseudomonas synxantha</i> | LMG 2190                                    | + | - | - | / | /    |
| <i>Pseudomonas synxantha</i> | NCTC10696                                   | + | - | - | / | /    |
| <i>Pseudomonas synxantha</i> | BG33R                                       | + | - | - | / | /    |
| <i>Pseudomonas syringae</i>  | inb918                                      | + | - | + | / | /    |
| <i>Pseudomonas syringae</i>  | Ps25                                        | + | - | - | / | /    |
| <i>Pseudomonas syringae</i>  | 31R1                                        | + | - | - | / | /    |
| <i>Pseudomonas syringae</i>  | CFBP3840                                    | + | - | - | / | /    |
| <i>Pseudomonas syringae</i>  | CC1557                                      | + | - | - | P | [61] |
| <i>Pseudomonas syringae</i>  | group<br>genomosp 3<br>CFBP6411             | + | - | - | / | /    |
| <i>Pseudomonas syringae</i>  | pv <i>actinidiae</i><br>ICMP 20586          | + | - | - | / | /    |
| <i>Pseudomonas syringae</i>  | pv <i>actinidiae</i><br>NZ-47               | + | - | - | / | /    |
| <i>Pseudomonas syringae</i>  | pv <i>actinidiae</i><br>CRAFRU 12.29        | + | - | - | P | [62] |
| <i>Pseudomonas syringae</i>  | pv <i>actinidiae</i><br>CRAFRU 14.8         | + | - | - | / | /    |
| <i>Pseudomonas syringae</i>  | pv <i>actinidiae</i><br>P155                | + | - | - | / | /    |
| <i>Pseudomonas syringae</i>  | pv <i>actinidiae</i><br>ICMP18708           | + | - | - | P | [63] |
| <i>Pseudomonas syringae</i>  | pv <i>actinidiae</i><br>ICMP18884           | + | - | - | P | [64] |
| <i>Pseudomonas syringae</i>  | pv <i>actinidiae</i><br>ICMP9617            | + | - | - | P | [64] |
| <i>Pseudomonas syringae</i>  | pv <i>actinidiae</i><br>ICMP9853            | + | - | - | P | [65] |
| <i>Pseudomonas syringae</i>  | pv <i>actinidiae</i><br>str Shaanxi<br>M228 | + | - | - | P | [66] |
| <i>Pseudomonas syringae</i>  | pv <i>atrofaciens</i><br>LMG5095            | + | - | - | / | /    |
| <i>Pseudomonas syringae</i>  | pv <i>avii</i><br>CFBP3846                  | + | - | - | P | [67] |
| <i>Pseudomonas syringae</i>  | pv <i>cerasicola</i><br>CFBP6109            | + | - | - | P | [68] |
| <i>Pseudomonas syringae</i>  | pv <i>lapsa</i> ATCC<br>10859               | + | - | - | P | [69] |
| <i>Pseudomonas syringae</i>  | pv <i>maculicola</i><br>str ES4326          | + | - | - | / | /    |
| <i>Pseudomonas syringae</i>  | pv <i>pisi</i> str PP1                      | + | - | - | / | /    |
| <i>Pseudomonas syringae</i>  | pv <i>syringae</i><br>Pss9097               | + | - | - | / | /    |
| <i>Pseudomonas syringae</i>  | pv <i>syringae</i><br>CFBP4215              | + | - | - | P | [68] |

|                                   |                              |   |   |   |   |      |
|-----------------------------------|------------------------------|---|---|---|---|------|
| <i>Pseudomonas syringae</i>       | pv <i>syringae</i> CFBP2118  | + | - | - | P | [68] |
| <i>Pseudomonas syringae</i>       | pv <i>syringae</i> B301D     | + | - | - | P | [70] |
| <i>Pseudomonas syringae</i>       | pv <i>syringae</i> B64       | + | - | - | P | [71] |
| <i>Pseudomonas syringae</i>       | pv <i>syringae</i> B728a     | + | - | - | P | [72] |
| <i>Pseudomonas syringae</i>       | pv <i>syringae</i> HS191     | + | - | - | P | [70] |
| <i>Pseudomonas syringae</i>       | pv <i>syringae</i> SM        | + | - | - | / | /    |
| <i>Pseudomonas syringae</i>       | pv <i>tomato</i> B13-200     | + | - | - | / | /    |
| <i>Pseudomonas syringae</i>       | pv <i>tomato</i> delta VI    | + | - | - | / | /    |
| <i>Pseudomonas syringae</i>       | pv <i>tomato</i> delta IV IX | + | - | - | / | /    |
| <i>Pseudomonas syringae</i>       | pv <i>tomato</i> delta X     | + | - | - | / | /    |
| <i>Pseudomonas syringae</i>       | pv <i>tomato</i> str DC3000  | + | - | - | P | [73] |
| <i>Pseudomonas syringae</i>       | UB303                        | + | - | - | / | /    |
| <i>Pseudomonas syringae</i>       | UMAF0158                     | + | - | - | P | [74] |
| <i>Pseudomonas syringae</i>       | USA011                       | + | - | - | / | /    |
| <i>Pseudomonas taetrolens</i>     | NCTC10697                    | + | - | - | / | /    |
| <i>Pseudomonas taetrolens</i>     | NCTC8067                     | + | - | - | / | /    |
| <i>Pseudomonas thiovalensis</i>   | DSM 13194                    | - | + | + | / | /    |
| <i>Pseudomonas tolaasii</i>       | 2192T                        | + | - | - | / | /    |
| <i>Pseudomonas trivialis</i>      | IHBB745                      | + | - | - | B | [75] |
| <i>Pseudomonas umsongensis</i>    | GO16                         | + | - | - | / | /    |
| <i>Pseudomonas umsongensis</i>    | LMG 21317                    | + | - | - | / | /    |
| <i>Pseudomonas vancouverensis</i> | LMG 20222                    | + | - | + | / | /    |
| <i>Pseudomonas versuta</i>        | L10 10                       | + | - | - | / | /    |
| <i>Pseudomonas viridiflava</i>    | CFBP 1590                    | + | - | - | P | [76] |

## References

- Smith, E.F.; Bryan, M. Angular leaf spot of cucumbers. *Journal of Agricultural Research* **1915**, *5*, 465-476.
- Jeong, H.; Kloepper, J.W.; Ryu, C.M. Genome sequences of *Pseudomonas amygdali* pv. *tabaci* strain ATCC 11528 and pv. *lachrymans* strain 98A-744. *Genome Announc* **2015**, *3*, doi:10.1128/genomeA.00683-15.
- Ark, P.A.; Tompkins, C.M. Bacterial leaf blight of bird's nest fern. *Phytopathology* **1946**, *36*, 758-761.
- Fang, Y.; Wu, L.; Chen, G.; Feng, G. Complete genome sequence of *Pseudomonas azotoformans* S4, a potential biocontrol bacterium. *J Biotechnol* **2016**, *227*, 25-26, doi:10.1016/j.jbiotec.2016.04.020.
- Berry, C.; Fernando, W.D.; Loewen, P.C.; De Kievit, T.R. Lipopeptides are essential for *Pseudomonas* sp. DF41 biocontrol of *Sclerotinia sclerotiorum*. *Biological Control* **2010**, *55*(3), 211-218.
- Novinscak, A.; Gadkar, V.J.; Joly, D.L.; Fillion, M. Complete genome sequence of *Pseudomonas brassicacearum* LBUM300, a disease-suppressive bacterium with antagonistic activity toward fungal, oomycete, and bacterial plant pathogens. *Genome Announc* **2016**, *4*, doi:10.1128/genomeA.01623-15.
- Grosch, R.; Faltin, F.; Lottmann, J.; Kofoet, A.; Berg, G. Effectiveness of 3 antagonistic bacterial isolates to control *Rhizoctonia solani* Kühn on lettuce and potato. *Can J Microbiol* **2005**, *51*, 345-353, doi:10.1139/w05-002.
- Nelkner, J.; Tejerizo, G.T.; Hassa, J.; Lin, T.W.; Witte, J.; Verwaaijen, B.; Winkler, A.; Bunk, B.; Sproer, C.; Overmann, J., et al. Genetic potential of the biocontrol agent *Pseudomonas brassicacearum* (formerly *P. trivialis*) 3Re2-7 unraveled by genome sequencing and mining, comparative genomics and transcriptomics. *Genes (Basel)* **2019**, *10*, doi:10.3390/genes10080601.

9. Ortet, P.; Barakat, M.; Lalaouina, D.; Fochesato, S.; Barbe, V.; Vacherie, B.; Santaella, C.; Heulin, T.; Achouak, W. Complete genome sequence of a beneficial plant root-associated bacterium, *Pseudomonas brassicacearum*. *J Bacteriol* **2011**, *193*, 3146, doi:10.1128/JB.00411-11.
10. Kaluzna, M.; Willems, A.; Pothier, J.F.; Ruinelli, M.; Sobiczewski, P.; Pulawska, J. *Pseudomonas cerasi* sp. nov. (non Griffin, 1911) isolated from diseased tissue of cherry. *Syst Appl Microbiol* **2016**, *39*, 370-377, doi:10.1016/j.syapm.2016.05.005.
11. Loewen, P.C.; Villeneuve, J.; Fernando, W.G.; de Kievit, T. Genome sequence of *Pseudomonas chlororaphis* strain PA23. *Genome Announc* **2014**, *2*, doi:10.1128/genomeA.00689-14.
12. Calderon, C.E.; de Vicente, A.; Cazorla, F.M. Role of 2-hexyl, 5-propyl resorcinol production by *Pseudomonas chlororaphis* PCL1606 in the multitrophic interactions in the avocado rhizosphere during the biocontrol process. *FEMS Microbiol Ecol* **2014**, *89*, 20-31, doi:10.1111/1574-6941.12319.
13. Deng, P.; Wang, X.; Baird, S.M.; Lu, S.E. Complete genome of *Pseudomonas chlororaphis* strain UFB2, a soil bacterium with antibacterial activity against bacterial canker pathogen of tomato. *Stand Genomic Sci* **2015**, *10*, 117, doi:10.1186/s40793-015-0106-x.
14. Town, J.; Audy, P.; Boyetchko, S.M.; Dumonceaux, T.J. Genome sequence of *Pseudomonas chlororaphis* strain 189. *Genome Announc* **2016**, *4*, doi:10.1128/genomeA.00581-16.
15. Li, Z.; Li, X.; Zeng, Q.; Chen, M.; Liu, D.; Wang, J.; Shen, L.; Song, F. Genome sequence of *Pseudomonas chlororaphis* Lzh-T5, a plant growth-promoting rhizobacterium with antimicrobial activity. *Genome Announc* **2018**, *6*, doi:10.1128/genomeA.00328-18.
16. Mehnaz, S.; Baig, D.N.; Lazarovits, G. Genetic and phenotypic diversity of plant growth promoting rhizobacteria isolated from sugarcane plants growing in pakistan. *J Microbiol Biotechnol* **2010**, *20*, 1614-1623, doi:10.4014/jmb.1005.05014.
17. Hunziker, L.; Bonisch, D.; Groenhagen, U.; Bailly, A.; Schulz, S.; Weisskopf, L. *Pseudomonas* strains naturally associated with potato plants produce volatiles with high potential for inhibition of *Phytophthora infestans*. *Appl Environ Microbiol* **2015**, *81*, 821-830, doi:10.1128/AEM.02999-14.
18. Kim, M.S.; Kim, Y.C.; Cho, B.H. Gene expression analysis in cucumber leaves primed by root colonization with *Pseudomonas chlororaphis* O6 upon challenge-inoculation with *Corynespora cassicola*. *Plant Biol (Stuttg)* **2004**, *6*, 105-108, doi:10.1055/s-2004-817803.
19. Zhang, L.; Chen, W.; Jiang, Q.; Fei, Z.; Xiao, M. Genome analysis of plant growth-promoting rhizobacterium *Pseudomonas chlororaphis* subsp. *aurantiaca* JD37 and insights from comparasion of genomics with three *Pseudomonas* strains. *Microbiol Res* **2020**, *237*, 126483, doi:10.1016/j.micres.2020.126483.
20. Morohoshi, T.; Yamaguchi, T.; Xie, X.; Wang, W.Z.; Takeuchi, K.; Someya, N. Complete genome sequence of *Pseudomonas chlororaphis* subsp. *aurantiaca* reveals a triplicate quorum-sensing mechanism for regulation of phenazine production. *Microbes Environ* **2017**, *32*, 47-53, doi:10.1264/jsme2.ME16162.
21. Puopolo, G.; Raio, A.; Pierson III, L.S.; Zoia, A. Selection of a new *Pseudomonas chlororaphis* strain for the biological control of *Fusarium oxysporum* f. sp. *radicis-lycopersici*. *Phytopathologia Mediterranea* **2011**, *50*(2), 228-235.
22. Pošćić, D.; Jošić, D.; Lepšanić, Z.; Aleksić, G.; Latković, D.; Starović, M. The effect of *Pseudomonas chlororaphis* subsp. *aurantiaca* strain Q16 able to inhibit *Fusarium oxysporum* growth on potato yield. *Ratarstvo i povrtarstvo* **2019**, *56*(2), 41-48.
23. Mehnaz, S.; Bechthold, A.; Gross, H. Draft genome sequence of *Pseudomonas chlororaphis* subsp. *aurantiaca* ARS-38, a bacterial strain with plant growth promotion potential, isolated from the rhizosphere of cotton in Pakistan. *Microbiol Resour Announc* **2020**, *9*, doi:10.1128/MRA.01398-19.
24. Pierson, L.S., 3rd; Gaffney, T.; Lam, S.; Gong, F. Molecular analysis of genes encoding phenazine biosynthesis in the biological control bacterium *Pseudomonas aureofaciens* 30-84. *FEMS Microbiol Lett* **1995**, *134*, 299-307, doi:10.1111/j.1574-6968.1995.tb07954.x.
25. Nagendran, R.; Lee, Y.H. Green and red light reduces the disease severity by *Pseudomonas cichorii* JBC1 in tomato plants via upregulation of defense-related gene expression. *Phytopathology* **2015**, *105*, 412-418, doi:10.1094/PHYTO-04-14-0108-R.
26. Dutta, B.; Gitaitis, R.; Agarwal, G.; Coutinho, T.; Langston, D. *Pseudomonas coronafaciens* sp. nov., a new phyto bacterial species diverse from *Pseudomonas syringae*. *PLoS One* **2018**, *13*, e0208271, doi:10.1371/journal.pone.0208271.
27. Zachow, C.; Muller, H.; Laireiter, C.M.; Tilcher, R.; Berg, G. Complete genome sequence of *Pseudomonas corrugata* strain RM1-1-4, a stress protecting agent from the rhizosphere of an oilseed rape bait plant. *Stand Genomic Sci* **2017**, *12*, 66, doi:10.1186/s40793-017-0278-7.
28. Sutra, L.; Siverio, F.; Lopez, M.M.; Hunault, G.; Bollet, C.; Gardan, L. Taxonomy of *Pseudomonas* strains isolated from tomato pith necrosis: emended description of *Pseudomonas corrugata* and proposal of three unnamed fluorescent *Pseudomonas* genomospecies. *Int J Syst Bacteriol* **1997**, *47*, 1020-1033, doi:10.1099/00207713-47-4-1020.
29. Yin, D.; Wang, N.; Xia, F.; Li, Q.; Wang, W. Impact of biocontrol agents *Pseudomonas fluorescens* 2P24 and CPF10 on the bacterial community in the cucumber rhizosphere. *European journal of soil biology* **2013**, *59*, 36-42.
30. Stritzler, M.; Diez Tissera, A.; Soto, G.; Ayub, N. Plant growth-promoting bacterium *Pseudomonas fluorescens* FR1 secretes a novel type of extracellular polyhydroxybutyrate polymerase involved in abiotic stress response in plants. *Biotechnol Lett* **2018**, *40*, 1419-1423, doi:10.1007/s10529-018-2576-6.
31. Ma, L.; Qu, S.; Lin, J.; Jia, J.; Baird, S.M.; Jiang, N.; Li, H.; Hou, L.; Lu, S.E. The complete genome of the antifungal bacterium *Pseudomonas* sp. strain MS82. *Journal of Plant Diseases and Protection* **2019**, *126*(2), 153-160.
32. Dutta, S.; Yu, S.M.; Jeong, S.C.; Lee, Y.H. High-throughput analysis of genes involved in biocontrol performance of *Pseudomonas fluorescens* NBC275 against Gray mold. *J Appl Microbiol* **2020**, *128*, 265-279, doi:10.1111/jam.14475.
33. Novinscak, A.; Joly, D.L.; Fillion, M. Complete genome sequence of the plant growth-promoting rhizobacterium *Pseudomonas fluorescens* LBUM677. *Microbiol Resour Announc* **2019**, *8*, doi:10.1128/MRA.00438-19.
34. P., S.; A., B.; F., O.G.; D., G.J. Isolation, trace enrichment and liquid-chromatographic analysis of diacetylphloroglucinol in culture and soil samples using UV and amperometric detection. *Journal of Chromatography A* **1992**, *606*(2), 171-177.

35. Silby, M.W.; Cerdano-Tarraga, A.M.; Vernikos, G.S.; Giddens, S.R.; Jackson, R.W.; Preston, G.M.; Zhang, X.X.; Moon, C.D.; Gehrig, S.M.; Godfrey, S.A., et al. Genomic and genetic analyses of diversity and plant interactions of *Pseudomonas fluorescens*. *Genome Biol* **2009**, *10*, R51, doi:10.1186/gb-2009-10-5-r51.
36. Bangera, M.G.; Thomashow, L.S. Characterization of a genomic locus required for synthesis of the antibiotic 2,4-diacetylphloroglucinol by the biological control agent *Pseudomonas fluorescens* Q2-87. *Mol Plant Microbe Interact* **1996**, *9*, 83-90, doi:10.1094/mpmi-9-0083.
37. Raaijmakers, J.M.; Weller, D.M. Exploiting the genetic diversity of *Pseudomonas* spp: characterization of superior colonizing *P. fluorescens* strain Q8r1-96. *Appl. Environ. Microbiol* **2001**, *67*, 2545-2554.
38. Naseby, D.C.; Way, J.A.; Bainton, N.J.; Lynch, J.M. Biocontrol of *Pythium* in the pea rhizosphere by antifungal metabolite producing and non-producing *Pseudomonas* strains. *J Appl Microbiol* **2001**, *90*, 421-429, doi:10.1046/j.1365-2672.2001.01260.x.
39. Zeigler, R.S.; Alvarez, E. Bacterial sheath brown rot of rice caused by *Pseudomonas fuscovaginae* in Latin America. *Plant Disease* **1987**, *71*(7), 592-597.
40. Lin, H.; Hu, S.; Liu, R.; Chen, P.; Ge, C.; Zhu, B.; Guo, L. Genome sequence of *Pseudomonas koreensis* CRS05-R5, an antagonistic bacterium isolated from rice paddy field. *Front Microbiol* **2016**, *7*, 1756, doi:10.3389/fmicb.2016.01756.
41. Wu, L.; Xiao, W.; Chen, G.; Song, D.; Khaskheli, M.A.; Li, P.; Zhang, S.; Feng, G. Identification of *Pseudomonas mosselii* BS011 gene clusters required for suppression of Rice Blast Fungus *Magnaporthe oryzae*. *J Biotechnol* **2018**, *282*, 1-9, doi:10.1016/j.jbiotec.2018.04.016.
42. Zengerer, V.; Schmid, M.; Bieri, M.; Muller, D.C.; Remus-Emsermann, M.N.P.; Ahrens, C.H.; Pelludat, C. *Pseudomonas orientalis* F9: a potent antagonist against phytopathogens with phytotoxic effect in the apple flower. *Front Microbiol* **2018**, *9*, 145, doi:10.3389/fmicb.2018.00145.
43. Jaaffar, A.K.M.; Parejko, J.A.; Paulitz, T.C.; Weller, D.M.; Thomashow, L.S. Sensitivity of *Rhizoctonia* isolates to phenazine-1-carboxylic acid and biological control by phenazine-producing *Pseudomonas* spp. *Phytopathology* **2017**, *107*, 692-703, doi:10.1094/PHYTO-07-16-0257-R.
44. Uron, P.; Giachini, A.J.; Glick, B.R.; Rossi, M.J.; Nascimento, F.X. Near-complete genome sequence of *Pseudomonas palleroniana* MAB3, a beneficial 1-aminocyclopropane-1-carboxylate deaminase-producing bacterium able to promote the growth of mushrooms and plants. *Genome Announc* **2018**, *6*, doi:10.1128/genomeA.00242-18.
45. Liu, Q.; Zhang, Y.; Yu, N.; Bi, Z.; Zhu, A.; Zhan, X.; Wu, W.; Yu, P.; Chen, D.; Cheng, S., et al. Genome sequence of *Pseudomonas parafulva* CRS01-1, an antagonistic bacterium isolated from rice field. *J Biotechnol* **2015**, *206*, 89-90, doi:10.1016/j.jbiotec.2015.03.017.
46. Kakembo, D.; Lee, Y.H. Analysis of traits for biocontrol performance of *Pseudomonas parafulva* JBCS1880 against bacterial pustule in soybean plants. *Biological Control* **2019**, *134*, 72-81.
47. Huang, X.; Wang, Z.; Liu, Y.; Zhang, X. Complete genome sequence of *Pseudomonas protegens* H78, a plant growth-promoting rhizobacterium. *Genome Announc* **2017**, *5*, doi:10.1128/genomeA.00233-17.
48. Chang, L.; Li, Q.; Tong, Y.; Xu, J.; Zhang, Q. Identification of the biocontrol bacterial strain FD6 and antimicrobial study of this bacterium against tomato grey mould pathogen *Botrytis cinerea*. *Acta Phytophylacica Sinica* **2011**, *38*(6), 487-492.
49. Lou, H.; Wang, X.; Chen, J.; Wang, B.; Wang, W. Transcriptomic response of *Ralstonia solanacearum* to antimicrobial *Pseudomonas fluorescens* SN15-2 metabolites. *Can J Microbiol* **2018**, *64*, 816-825, doi:10.1139/cjm-2018-0094.
50. Takeuchi, K.; Noda, N.; Someya, N. Complete genome sequence of the biocontrol strain *Pseudomonas protegens* Cab57 discovered in Japan reveals strain-specific diversity of this species. *PLoS One* **2014**, *9*, e93683, doi:10.1371/journal.pone.0093683.
51. Stutz, E.W.; D  fago, G.; Kern, H. Naturally occurring fluorescent pseudomonads involved in suppression of black root rot of tobacco. *Phytopathology* **1986**, *76*, 181-185.
52. Howell, C.R.; Stipanovic, R.D. Control of *Rhizoctonia solani* on cotton seedlings with *Pseudomonas fluorescens* and with an antibiotic produced by the bacterium. *Phytopathology* **1979**, *69*(5), 480-482.
53. Zhai, Y.; Shao, Z.; Cai, M.; Zheng, L.; Li, G.; Yu, Z.; Zhang, J. Cyclo(l-Pro)-(l-Leu) of *Pseudomonas putida* MCCC 1A00316 isolated from antarctic soil: identification and characterization of activity against *Meloidogyne incognita*. *Molecules* **2019**, *24*, doi:10.3390/molecules24040768.
54. Yu, S.M.; Lee, Y.H. Genes involved in nutrient competition by *Pseudomonas putida* JBC17 to suppress green mold in postharvest satsuma mandarin. *J Basic Microbiol* **2015**, *55*, 898-906, doi:10.1002/jobm.201400792.
55. Molina, L.; Bernal, P.; Udaondo, Z.; Segura, A.; Ramos, J.L. Complete genome sequence of a *Pseudomonas putida* clinical isolate, strain H8234. *Genome Announc* **2013**, *1*, doi:10.1128/genomeA.00496-13.
56. Taghavi, S.; Garafola, C.; Monchy, S.; Newman, L.; Hoffman, A.; Weyens, N.; Barac, T.; Vangronsveld, J.; van der Lelie, D. Genome survey and characterization of endophytic bacteria exhibiting a beneficial effect on growth and development of poplar trees. *Appl Environ Microbiol* **2009**, *75*, 748-757, doi:10.1128/AEM.02239-08.
57. Perez-Martinez, I.; Rodriguez-Moreno, L.; Matas, I.M.; Ramos, C. Strain selection and improvement of gene transfer for genetic manipulation of *Pseudomonas savastanoi* isolated from olive knots. *Res Microbiol* **2007**, *158*, 60-69, doi:10.1016/j.resmic.2006.09.008.
58. Pieterse, C.M.; Zamioudis, C.; Berendsen, R.L.; Weller, D.M.; Van Wees, S.C.; Bakker, P.A. Induced systemic resistance by beneficial microbes. *Annu Rev Phytopathol* **2014**, *52*, 347-375, doi:10.1146/annurev-phyto-082712-102340.
59. Kamilova, F.; Validov, S.; Azarova, T.; Mulders, I.; Lugtenberg, B. Enrichment for enhanced competitive plant root tip colonizers selects for a new class of biocontrol bacteria. *Environ Microbiol* **2005**, *7*, 1809-1817, doi:10.1111/j.1462-2920.2005.00889.x.
60. Arseneault, T.; Goyer, C.; Fillion, M. *Pseudomonas fluorescens* LBUM223 increases potato yield and reduces common scab symptoms in the field. *Phytopathology* **2015**, *105*, 1311-1317, doi:10.1094/PHYTO-12-14-0358-R.

61. Hockett, K.L.; Nishimura, M.T.; Karlsrud, E.; Dougherty, K.; Baltrus, D.A. *Pseudomonas syringae* CC1557: a highly virulent strain with an unusually small type III effector repertoire that includes a novel effector. *Mol Plant Microbe Interact* **2014**, *27*, 923-932, doi:10.1094/MPMI-11-13-0354-R.
62. Firrao, G.; Torelli, E.; Polano, C.; Ferrante, P.; Ferrini, F.; Martini, M.; Marcelletti, S.; Scortichini, M.; Ermacora, P. Genomic structural variations affecting virulence during clonal expansion of *Pseudomonas syringae* pv. *actinidiae* biovar 3 in Europe. *Front Microbiol* **2018**, *9*, 656, doi:10.3389/fmicb.2018.00656.
63. Everett, K.R.; Taylor, R.K.; Romberg, M.K.; Rees-George, J.; Fullerton, R.A.; Vanneste, J.L.; Manning, M.A. First report of *Pseudomonas syringae* pv. *actinidiae* causing kiwifruit bacterial canker in New Zealand. *Australasian Plant Disease Notes* **2011**, *6*(1), 67-71.
64. McCann, H.C.; Rikkerink, E.H.; Bertels, F.; Fiers, M.; Lu, A.; Rees-George, J.; Andersen, M.T.; Gleave, A.P.; Haubold, B.; Wohlers, M.W., et al. Genomic analysis of the Kiwifruit pathogen *Pseudomonas syringae* pv. *actinidiae* provides insight into the origins of an emergent plant disease. *PLoS Pathog* **2013**, *9*, e1003503, doi:10.1371/journal.ppat.1003503.
65. Takikawa, Y.; Serizawa, S.; Ichikawa, T.; Tsuyumu, S.; Goto, M. *Pseudomonas syringae* pv. *actinidiae* pv. nov. . *Japanese Journal of Phytopathology* **1989**, *55*(4), 437-444.
66. Ho, J.; Taiaroa, G.; Butler, M.I.; Poulter, R.T.M. The genome sequence of M228, a chinese isolate of *Pseudomonas syringae* pv. *actinidiae*, illustrates insertion sequence element mobility. *Microbiol Resour Announc* **2019**, *8*, doi:10.1128/MRA.01427-18.
67. Ménard, M.; Sutra, L.; Luisetti, J.; Prunier, J.P.; Gardan, L. *Pseudomonas syringae* pv. *avii* (pv. nov.), the causal agent of bacterial canker of wild cherries (*Prunus avium*) in France. *European Journal of Plant Pathology* **2003**, *109*(6), 565-576.
68. Ruinelli, M.; Blom, J.; Smits, T.H.M.; Pothier, J.F. Comparative genomics and pathogenicity potential of members of the *Pseudomonas syringae* species complex on *Prunus* spp. *BMC Genomics* **2019**, *20*, 172, doi:10.1186/s12864-019-5555-y.
69. Kong, J.; Jiang, H.; Li, B.; Zhao, W.; Li, Z.; Zhu, S. Complete genome sequence of *Pseudomonas syringae* pv. *lapse* strain ATCC 10859, isolated from infected wheat. *Genome Announc* **2016**, *4*, doi:10.1128/genomeA.00024-16.
70. Ravindran, A.; Jalan, N.; Yuan, J.S.; Wang, N.; Gross, D.C. Comparative genomics of *Pseudomonas syringae* pv. *syringae* strains B301D and HS 191 and insights into intrapathovar traits associated with plant pathogenesis. *Microbiologyopen* **2015**, *4*(4), 553-573.
71. Dudnik, A.; Dudler, R. High-quality draft genome sequence of *Pseudomonas syringae* pv. *syringae* strain SM, isolated from wheat. *Genome Announc* **2013**, *1*, doi:10.1128/genomeA.00610-13.
72. Vinatzer, B.A.; Teitzel, G.M.; Lee, M.W.; Jelenska, J.; Hotton, S.; Fairfax, K.; Jenrette, J.; Greenberg, J.T. The type III effector repertoire of *Pseudomonas syringae* pv. *syringae* B728a and its role in survival and disease on host and non-host plants. *Mol Microbiol* **2006**, *62*, 26-44, doi:10.1111/j.1365-2958.2006.05350.x.
73. Cuppels, D.A. Generation and characterization of Tn5 insertion mutations in *Pseudomonas syringae* pv. *tomato*. *Appl Environ Microbiol* **1986**, *51*, 323-327, doi:10.1128/AEM.51.2.323-327.1986.
74. Martinez-Garcia, P.M.; Rodriguez-Palenzuela, P.; Arrebola, E.; Carrion, V.J.; Gutierrez-Barranquero, J.A.; Perez-Garcia, A.; Ramos, C.; Cazorla, F.M.; de Vicente, A. Bioinformatics analysis of the complete genome sequence of the mango tree pathogen *Pseudomonas syringae* pv. *syringae* UMAF0158 reveals traits relevant to virulence and epiphytic lifestyle. *PLoS One* **2015**, *10*, e0136101, doi:10.1371/journal.pone.0136101.
75. Gulati, A.; Swarnkar, M.K.; Vyas, P.; Rahi, P.; Thakur, R.; Thakur, N.; Singh, A.K. Complete genome sequence of the rhizobacterium *Pseudomonas trivialis* strain IHBB745 with multiple plant growth-promoting activities and tolerance to desiccation and alkalinity. *Genome Announc* **2015**, *3*, doi:10.1128/genomeA.00943-15.
76. Ruinelli, M.; Blom, J.; Pothier, J.F. Complete genome sequence of *Pseudomonas viridiflava* CFBP 1590, isolated from diseased cherry in France. *Genome Announc* **2017**, *5*, doi:10.1128/genomeA.00662-17.
