# Supplementary material for: In Silico Characterization and Phylogenetic Distribution of Extracellular Matrix Components in the Model Rhizobacteria Pseudomonas fluorescens F113 and Other Pseudomonads
Source: MDPI journal article supplement (doi:10.3390/microorganisms8111740), 2020-11-06
Supplement: s1 [file s1]

**Supplementary Table 1. Comparison of *Pseudomonas fluorescens* F113 ECM components outside *Pseudomonadales***

| Name        | Locus (PSF113_) | Protein predicted function                                                                                       | Protein homology                     |         |
|-------------|-----------------|------------------------------------------------------------------------------------------------------------------|--------------------------------------|---------|
| <i>pgaA</i> | 161             | Poly-beta-1,6 N-acetyl-D-glucosamine export porin                                                                | <i>Paraburkholderia insulsa</i>      | 70%     |
|             |                 |                                                                                                                  | <i>Achromobacter</i> spp.            |         |
| <i>pgaB</i> | 162             | Poly-beta-1,6-N-acetyl-D-glucosamine N-deacetylase                                                               | <i>Paraburkholderia insulsa</i>      | 63-77 % |
|             |                 |                                                                                                                  | <i>Achromobacter</i> spp.            |         |
|             |                 |                                                                                                                  | <i>Cupriavidus gilardii</i>          |         |
| <i>pgaC</i> | 163             | Poly-beta-1,6 N-acetyl-D-glucosamine synthase, catalytic subunit                                                 | <i>Paraburkholderia insulsa</i>      | 72-85 % |
|             |                 |                                                                                                                  | <i>Achromobacter</i> spp.            |         |
| <i>pgaD</i> | 164             | Poly-beta-1,6-N-acetyl-D-glucosamine synthase, regulatory subunit; c-di-GMP-stimulated activity and dimerization | <i>Paraburkholderia insulsa</i>      | 36-46 % |
|             |                 |                                                                                                                  | <i>Xenorhabdus beddingii</i>         |         |
|             |                 |                                                                                                                  | <i>Citrobacter werkmanii</i>         |         |
| <i>papA</i> | 1970            | UDP-glucose/GDP-mannose dehydrogenase family protein                                                             | <i>Halomonas</i> sp. KM-1            | 61-62 % |
|             |                 |                                                                                                                  | <i>Serratia</i> sp. M24T3            |         |
|             |                 |                                                                                                                  | <i>Alishewanella aestuarii</i>       |         |
|             |                 |                                                                                                                  | <i>Chelativorans</i> sp. BNC1        |         |
| <i>papB</i> | 1969            | Nucleoside-diphosphate-sugar epimerase                                                                           | <i>Geobacillus</i> sp. WCH70         | 59-62 % |
|             |                 | NAD dependent epimerase/dehydratase                                                                              | <i>Thermithiobacillus tepidarius</i> |         |
|             |                 |                                                                                                                  | <i>Balneatrix alpaca</i>             |         |
|             |                 |                                                                                                                  | <i>Bacillus oceanisediminis</i>      |         |
| <i>papC</i> | 1968            | Undecaprenyl-phosphate galactose                                                                                 | <i>Zooshikella ganghwensis</i>       | 57-60 % |
|             |                 |                                                                                                                  | <i>Desulfobulbus japonicus</i>       |         |
|             |                 |                                                                                                                  | <i>Sphingomonas</i> sp. TZW2008      |         |
| <i>papD</i> | 1967            | Autophosphorylating protein tyrosine kinase                                                                      | <i>Paraburkholderia insulsa</i>      | 71-72 % |
|             |                 |                                                                                                                  | <i>Achromobacter</i> spp.            |         |
|             |                 |                                                                                                                  | <i>Cupriavidus gilardii</i>          |         |
| <i>papE</i> | 1966            | Polysaccharide biosynthesis/export protein                                                                       | <i>Zooshikella ganghwensis</i>       | 32-38 % |
|             |                 |                                                                                                                  | <i>Gamma proteobacterium</i> HdN1    |         |
|             |                 |                                                                                                                  | <i>Desulfobulbus japonicus</i>       |         |
| <i>papF</i> | 1965            | Uncharacterized protein involved in exopolysaccharide biosynthesis                                               | <i>Zooshikella ganghwensis</i>       | 29-40 % |
|             |                 |                                                                                                                  | <i>Gamma proteobacterium</i> HdN1    |         |
|             |                 |                                                                                                                  | <i>Desulfobulbus japonicus</i>       |         |
| <i>papG</i> | 1964            | Glycosyl transferases group 1                                                                                    | <i>Zooshikella ganghwensis</i>       | 33-35 % |
|             |                 |                                                                                                                  | <i>Gamma proteobacterium</i> HdN1    |         |
|             |                 |                                                                                                                  | <i>Geobacter sulfurreducens</i>      |         |
| <i>papH</i> | 1963            | O-Antigen ligase                                                                                                 | <i>Zooshikella ganghwensis</i>       | 38-43 % |
|             |                 |                                                                                                                  | <i>Gamma proteobacterium</i> HdN1    |         |

|             |      |                                                               |                                                               |         |
|-------------|------|---------------------------------------------------------------|---------------------------------------------------------------|---------|
|             |      |                                                               | <i>Desulfobulbus japonicus</i>                                |         |
| <i>papI</i> | 1962 | Glycosyl transferases group 1                                 | <i>Desulfobulbus japonicus</i>                                | 40-43 % |
|             |      |                                                               | Gamma proteobacterium HdN1                                    |         |
|             |      |                                                               | <i>Zooshikella ganghwensis</i>                                |         |
| <i>papJ</i> | 1961 | Glycosyl transferase, group 2 family protein                  | Gamma proteobacterium HdN1                                    | 40-47 % |
|             |      |                                                               | <i>Desulfobulbus japonicus</i>                                |         |
|             |      |                                                               | <i>Zooshikella ganghwensis</i>                                |         |
| <i>papK</i> | 1960 | Polysaccharide deacetylase                                    | <i>Halomonas xinjiagensis</i>                                 | 38-41 % |
|             |      |                                                               | <i>Halomonas anticariensis</i>                                |         |
|             |      |                                                               | <i>Halomonas xianhensis</i>                                   |         |
| <i>papL</i> | 1959 | Polysaccharide biosynthesis protein                           | Gamma proteobacterium HdN1                                    | 37-40 % |
|             |      |                                                               | <i>Zooshikella ganghwensis</i> <i>Desulfobulbus japonicus</i> |         |
| <i>papM</i> | 1958 | Hypothetical protein (no putative conserved domains detected) | <i>Zooshikella ganghwensis</i> Gamma proteobacterium HdN1     | 35-42 % |
|             |      |                                                               | <i>Desulfobulbus japonicus</i>                                |         |
| <i>papN</i> | 1957 | Hypothetical protein (no putative conserved domains detected) | <i>Zooshikella ganghwensis</i>                                | 24-29 % |
|             |      |                                                               | <i>Desulfobulbus japonicus</i>                                |         |
| <i>papO</i> | 1956 | Acetyltransferase (GNAT) domain                               | <i>Microvirga guangxiensis</i>                                | 26-32 % |
|             |      |                                                               | Gamma proteobacterium HdN1                                    |         |
|             |      |                                                               | <i>Desulfobulbus japonicus</i>                                |         |
|             |      |                                                               | <i>Zooshikella ganghwensis</i>                                |         |
| <i>papP</i> | 1955 | YdjC-like protein                                             | <i>Lachnospiraceae</i>                                        | 35-37 % |
| <i>lapA</i> | 208  | Protein LapA                                                  | <i>Stenotrophomonas rhizophila</i>                            | 48-56%  |
|             |      |                                                               | <i>Pantoea</i>                                                |         |
| <i>mapA</i> | 1511 | Putative hemagglutinin/hemolysin-like protein                 | <i>Pantoea</i>                                                | 40-56%  |
|             |      |                                                               | <i>Aeromonas</i>                                              |         |
| <i>psmE</i> | 3004 | Protein PsmE                                                  | <i>Asticcaculis sp</i>                                        | 40-48%  |
|             |      |                                                               | <i>Tanacetum cinerariifolium</i>                              |         |
|             |      |                                                               | <i>Microvirga sp.</i> BSC39                                   |         |
|             |      |                                                               | <i>Methylobacter</i>                                          |         |
