# Supplementary material for: In Silico Characterization and Phylogenetic Distribution of Extracellular Matrix Components in the Model Rhizobacteria Pseudomonas fluorescens F113 and Other Pseudomonads
Source: MDPI journal article supplement (doi:10.3390/microorganisms8111740), 2020-11-06
Supplement: s1 [file s1]

**Supplementary Table 2. List of *Pseudomonas* genomes used in this study.**

| <b>Name</b>                             | <b>Assembly level</b> | <b>Assembly accession identifier</b> | <b>Assigned group</b> |
|-----------------------------------------|-----------------------|--------------------------------------|-----------------------|
| <i>Pseudomonas aeruginosa</i> PSE305    | Chromosome            | GCF_000750905.1                      | <i>P. aeruginosa</i>  |
| <i>Pseudomonas aeruginosa</i> CCBH4851  | Chromosome            | GCF_000763245.2                      | <i>P. aeruginosa</i>  |
| <i>Pseudomonas aeruginosa</i> F22031    | Complete Genome       | GCF_000816985.1                      | <i>P. aeruginosa</i>  |
| <i>Pseudomonas aeruginosa</i> NCGM1984  | Complete Genome       | GCF_000829255.1                      | <i>P. aeruginosa</i>  |
| <i>Pseudomonas aeruginosa</i> NCGM1900  | Complete Genome       | GCF_000829275.1                      | <i>P. aeruginosa</i>  |
| <i>Pseudomonas aeruginosa</i> FRD1      | Complete Genome       | GCF_000829885.1                      | <i>P. aeruginosa</i>  |
| <i>Pseudomonas aeruginosa</i> Carb01 63 | Complete Genome       | GCF_000981825.1                      | <i>P. aeruginosa</i>  |
| <i>Pseudomonas aeruginosa</i> S04 90    | Chromosome            | GCF_000988505.1                      | <i>P. aeruginosa</i>  |
| <i>Pseudomonas aeruginosa</i> F9676     | Complete Genome       | GCF_001077475.1                      | <i>P. aeruginosa</i>  |
| <i>Pseudomonas aeruginosa</i> PAIRG     | Complete Genome       | GCF_001293085.1                      | <i>P. aeruginosa</i>  |
| <i>Pseudomonas aeruginosa</i> VA-134    | Complete Genome       | GCF_001447845.1                      | <i>P. aeruginosa</i>  |
| <i>Pseudomonas aeruginosa</i> NCTC10332 | Complete Genome       | GCF_001457615.1                      | <i>P. aeruginosa</i>  |
| <i>Pseudomonas aeruginosa</i> 12-4-4 59 | Complete Genome       | GCF_001482325.1                      | <i>P. aeruginosa</i>  |
| <i>Pseudomonas aeruginosa</i> S86968    | Complete Genome       | GCF_001515845.2                      | <i>P. aeruginosa</i>  |
| <i>Pseudomonas aeruginosa</i> T38079    | Complete Genome       | GCF_001515915.2                      | <i>P. aeruginosa</i>  |
| <i>Pseudomonas aeruginosa</i> T52373    | Complete Genome       | GCF_001516005.1                      | <i>P. aeruginosa</i>  |
| <i>Pseudomonas aeruginosa</i> T63266    | Complete Genome       | GCF_001516105.1                      | <i>P. aeruginosa</i>  |
| <i>Pseudomonas aeruginosa</i> W16407    | Complete Genome       | GCF_001516165.2                      | <i>P. aeruginosa</i>  |
| <i>Pseudomonas aeruginosa</i> W36662    | Complete Genome       | GCF_001516185.2                      | <i>P. aeruginosa</i>  |
| <i>Pseudomonas aeruginosa</i> W45909    | Complete Genome       | GCF_001516205.2                      | <i>P. aeruginosa</i>  |
| <i>Pseudomonas aeruginosa</i> W60856    | Complete Genome       | GCF_001516225.2                      | <i>P. aeruginosa</i>  |
| <i>Pseudomonas aeruginosa</i> F23197    | Complete Genome       | GCF_001516245.2                      | <i>P. aeruginosa</i>  |
| <i>Pseudomonas aeruginosa</i> F30658    | Complete Genome       | GCF_001516265.1                      | <i>P. aeruginosa</i>  |
| <i>Pseudomonas aeruginosa</i> H5708     | Complete Genome       | GCF_001516305.2                      | <i>P. aeruginosa</i>  |
| <i>Pseudomonas aeruginosa</i> H27930    | Complete Genome       | GCF_001516325.2                      | <i>P. aeruginosa</i>  |
| <i>Pseudomonas aeruginosa</i> H47921    | Complete Genome       | GCF_001516345.1                      | <i>P. aeruginosa</i>  |
| <i>Pseudomonas aeruginosa</i> M1608     | Complete Genome       | GCF_001516365.2                      | <i>P. aeruginosa</i>  |

|                                                     |                 |                 |                      |
|-----------------------------------------------------|-----------------|-----------------|----------------------|
| <i>Pseudomonas aeruginosa</i> M37351                | Complete Genome | GCF_001516385.1 | <i>P. aeruginosa</i> |
| <i>Pseudomonas aeruginosa</i> USDA-ARS-USMARC-41639 | Complete Genome | GCF_001518975.1 | <i>P. aeruginosa</i> |
| <i>Pseudomonas aeruginosa</i> X78812                | Complete Genome | GCF_001542795.2 | <i>P. aeruginosa</i> |
| <i>Pseudomonas aeruginosa</i> F9670                 | Complete Genome | GCF_001542835.1 | <i>P. aeruginosa</i> |
| <i>Pseudomonas aeruginosa</i> NCGM257               | Complete Genome | GCF_001547955.1 | <i>P. aeruginosa</i> |
| <i>Pseudomonas aeruginosa</i> 8380                  | Complete Genome | GCF_001548135.1 | <i>P. aeruginosa</i> |
| <i>Pseudomonas aeruginosa</i> IOMTU 133             | Complete Genome | GCF_001548335.1 | <i>P. aeruginosa</i> |
| <i>Pseudomonas aeruginosa</i> F63912                | Complete Genome | GCF_001594325.2 | <i>P. aeruginosa</i> |
| <i>Pseudomonas aeruginosa</i> N17-1                 | Complete Genome | GCF_001606045.1 | <i>P. aeruginosa</i> |
| <i>Pseudomonas aeruginosa</i> BAMCPA07-48           | Complete Genome | GCF_001632245.1 | <i>P. aeruginosa</i> |
| <i>Pseudomonas aeruginosa</i> PA121617              | Complete Genome | GCF_001679685.1 | <i>P. aeruginosa</i> |
| <i>Pseudomonas aeruginosa</i> ATCC 27853            | Complete Genome | GCF_001687285.1 | <i>P. aeruginosa</i> |
| <i>Pseudomonas aeruginosa</i> PA D1                 | Complete Genome | GCF_001721745.1 | <i>P. aeruginosa</i> |
| <i>Pseudomonas aeruginosa</i> PA D2                 | Complete Genome | GCF_001721765.1 | <i>P. aeruginosa</i> |
| <i>Pseudomonas aeruginosa</i> PA D9                 | Complete Genome | GCF_001721785.1 | <i>P. aeruginosa</i> |
| <i>Pseudomonas aeruginosa</i> PA D16                | Complete Genome | GCF_001721805.1 | <i>P. aeruginosa</i> |
| <i>Pseudomonas aeruginosa</i> PA D22                | Complete Genome | GCF_001721825.1 | <i>P. aeruginosa</i> |
| <i>Pseudomonas aeruginosa</i> PA D25                | Complete Genome | GCF_001721845.1 | <i>P. aeruginosa</i> |
| <i>Pseudomonas aeruginosa</i> DN1                   | Complete Genome | GCF_001722005.2 | <i>P. aeruginosa</i> |
| <i>Pseudomonas aeruginosa</i> PA D5                 | Complete Genome | GCF_001722025.1 | <i>P. aeruginosa</i> |
| <i>Pseudomonas aeruginosa</i> PA D21                | Complete Genome | GCF_001722045.1 | <i>P. aeruginosa</i> |
| <i>Pseudomonas aeruginosa</i> ATCC 15692            | Complete Genome | GCF_001729505.1 | <i>P. aeruginosa</i> |
| <i>Pseudomonas aeruginosa</i> FA-HZ1                | Complete Genome | GCF_001750705.1 | <i>P. aeruginosa</i> |
| <i>Pseudomonas aeruginosa</i> PA1088                | Complete Genome | GCF_001792835.1 | <i>P. aeruginosa</i> |
| <i>Pseudomonas aeruginosa</i> PA8281                | Complete Genome | GCF_001792855.1 | <i>P. aeruginosa</i> |
| <i>Pseudomonas aeruginosa</i> PA11803               | Complete Genome | GCF_001792875.1 | <i>P. aeruginosa</i> |
| <i>Pseudomonas aeruginosa</i> PA7790                | Complete Genome | GCF_001870265.1 | <i>P. aeruginosa</i> |
| <i>Pseudomonas aeruginosa</i> B10W                  | Complete Genome | GCF_001874465.1 | <i>P. aeruginosa</i> |

|                                            |                 |                 |                      |
|--------------------------------------------|-----------------|-----------------|----------------------|
| <i>Pseudomonas aeruginosa</i> Paer4 119    | Complete Genome | GCF_001879525.1 | <i>P. aeruginosa</i> |
| <i>Pseudomonas aeruginosa</i> SCVFeb       | Complete Genome | GCF_001900195.1 | <i>P. aeruginosa</i> |
| <i>Pseudomonas aeruginosa</i> SCVJan       | Complete Genome | GCF_001900225.1 | <i>P. aeruginosa</i> |
| <i>Pseudomonas aeruginosa</i> NHmuc        | Complete Genome | GCF_001900265.1 | <i>P. aeruginosa</i> |
| <i>Pseudomonas aeruginosa</i> PA 154197    | Complete Genome | GCF_002075065.1 | <i>P. aeruginosa</i> |
| <i>Pseudomonas aeruginosa</i> RIVM-EMC2982 | Complete Genome | GCF_002085605.1 | <i>P. aeruginosa</i> |
| <i>Pseudomonas aeruginosa</i> E6130952     | Complete Genome | GCF_002085755.1 | <i>P. aeruginosa</i> |
| <i>Pseudomonas aeruginosa</i> PASGNDM699   | Complete Genome | GCF_002104595.1 | <i>P. aeruginosa</i> |
| <i>Pseudomonas aeruginosa</i> PASGNDM345   | Complete Genome | GCF_002104615.1 | <i>P. aeruginosa</i> |
| <i>Pseudomonas aeruginosa</i> M8A1         | Chromosome      | GCF_002116945.1 | <i>P. aeruginosa</i> |
| <i>Pseudomonas aeruginosa</i> M8A4         | Chromosome      | GCF_002116985.1 | <i>P. aeruginosa</i> |
| <i>Pseudomonas aeruginosa</i> M28A1        | Chromosome      | GCF_002117025.1 | <i>P. aeruginosa</i> |
| <i>Pseudomonas aeruginosa</i> Pb18         | Chromosome      | GCF_002117045.1 | <i>P. aeruginosa</i> |
| <i>Pseudomonas aeruginosa</i> Pa124        | Complete Genome | GCF_002192475.1 | <i>P. aeruginosa</i> |
| <i>Pseudomonas aeruginosa</i> Pa58         | Complete Genome | GCF_002192495.1 | <i>P. aeruginosa</i> |
| <i>Pseudomonas aeruginosa</i> Pa84         | Complete Genome | GCF_002205335.1 | <i>P. aeruginosa</i> |
| <i>Pseudomonas aeruginosa</i> Pa127        | Complete Genome | GCF_002205355.1 | <i>P. aeruginosa</i> |
| <i>Pseudomonas aeruginosa</i> Pa1242       | Complete Genome | GCF_002205375.1 | <i>P. aeruginosa</i> |
| <i>Pseudomonas aeruginosa</i> Pa1207       | Complete Genome | GCF_002208645.1 | <i>P. aeruginosa</i> |
| <i>Pseudomonas aeruginosa</i> PA83         | Complete Genome | GCF_002215345.1 | <i>P. aeruginosa</i> |
| <i>Pseudomonas aeruginosa</i> L10          | Complete Genome | GCF_002223805.1 | <i>P. aeruginosa</i> |
| <i>Pseudomonas aeruginosa</i> Ocean-1155   | Complete Genome | GCF_002237405.1 | <i>P. aeruginosa</i> |
| <i>Pseudomonas aeruginosa</i> Ocean-1175   | Complete Genome | GCF_002237425.1 | <i>P. aeruginosa</i> |
| <i>Pseudomonas aeruginosa</i> PPF-1        | Complete Genome | GCF_002287725.2 | <i>P. aeruginosa</i> |
| <i>Pseudomonas aeruginosa</i> 97           | Complete Genome | GCF_002411865.3 | <i>P. aeruginosa</i> |
| <i>Pseudomonas aeruginosa</i> PA 150577    | Complete Genome | GCF_002442855.1 | <i>P. aeruginosa</i> |
| <i>Pseudomonas aeruginosa</i> 12939        | Complete Genome | GCF_002753655.1 | <i>P. aeruginosa</i> |
| <i>Pseudomonas aeruginosa</i> PB369        | Complete Genome | GCF_002812825.1 | <i>P. aeruginosa</i> |
| <i>Pseudomonas aeruginosa</i> PB368        | Complete Genome | GCF_002812845.1 | <i>P. aeruginosa</i> |

|                                           |                 |                 |                      |
|-------------------------------------------|-----------------|-----------------|----------------------|
| <i>Pseudomonas aeruginosa</i> PB353       | Complete Genome | GCF_002812865.1 | <i>P. aeruginosa</i> |
| <i>Pseudomonas aeruginosa</i> PB354       | Complete Genome | GCF_002812885.1 | <i>P. aeruginosa</i> |
| <i>Pseudomonas aeruginosa</i> PB350       | Complete Genome | GCF_002812905.1 | <i>P. aeruginosa</i> |
| <i>Pseudomonas aeruginosa</i> PB367       | Complete Genome | GCF_002812925.1 | <i>P. aeruginosa</i> |
| <i>Pseudomonas aeruginosa</i> F5677       | Complete Genome | GCF_002946935.1 | <i>P. aeruginosa</i> |
| <i>Pseudomonas aeruginosa</i> AR 0360     | Complete Genome | GCF_002968515.1 | <i>P. aeruginosa</i> |
| <i>Pseudomonas aeruginosa</i> AR 0354     | Complete Genome | GCF_002968585.1 | <i>P. aeruginosa</i> |
| <i>Pseudomonas aeruginosa</i> AR 0353     | Complete Genome | GCF_002968655.1 | <i>P. aeruginosa</i> |
| <i>Pseudomonas aeruginosa</i> AR 0230     | Complete Genome | GCF_002968695.1 | <i>P. aeruginosa</i> |
| <i>Pseudomonas aeruginosa</i> AR 0356     | Complete Genome | GCF_002968755.1 | <i>P. aeruginosa</i> |
| <i>Pseudomonas aeruginosa</i> AR 0357     | Complete Genome | GCF_002968955.1 | <i>P. aeruginosa</i> |
| <i>Pseudomonas aeruginosa</i> AR 0095     | Complete Genome | GCF_002997005.1 | <i>P. aeruginosa</i> |
| <i>Pseudomonas aeruginosa</i> CR1         | Complete Genome | GCF_003025345.2 | <i>P. aeruginosa</i> |
| <i>Pseudomonas aeruginosa</i> MRSN12280   | Complete Genome | GCF_003028335.1 | <i>P. aeruginosa</i> |
| <i>Pseudomonas aeruginosa</i> WCHPA075019 | Complete Genome | GCF_003052005.2 | <i>P. aeruginosa</i> |
| <i>Pseudomonas aeruginosa</i> JB2         | Complete Genome | GCF_003060845.1 | <i>P. aeruginosa</i> |
| <i>Pseudomonas aeruginosa</i> AR444       | Complete Genome | GCF_003073615.1 | <i>P. aeruginosa</i> |
| <i>Pseudomonas aeruginosa</i> AR441       | Complete Genome | GCF_003073695.1 | <i>P. aeruginosa</i> |
| <i>Pseudomonas aeruginosa</i> AR445       | Complete Genome | GCF_003073735.1 | <i>P. aeruginosa</i> |
| <i>Pseudomonas aeruginosa</i> AR442       | Complete Genome | GCF_003073795.1 | <i>P. aeruginosa</i> |
| <i>Pseudomonas aeruginosa</i> AR439       | Complete Genome | GCF_003073895.1 | <i>P. aeruginosa</i> |
| <i>Pseudomonas aeruginosa</i> AR 0440     | Chromosome      | GCF_003074095.1 | <i>P. aeruginosa</i> |
| <i>Pseudomonas aeruginosa</i> AR 0443     | Chromosome      | GCF_003074115.1 | <i>P. aeruginosa</i> |
| <i>Pseudomonas aeruginosa</i> AR 0446     | Complete Genome | GCF_003193645.1 | <i>P. aeruginosa</i> |
| <i>Pseudomonas aeruginosa</i> CCUG 70744  | Complete Genome | GCF_003194245.1 | <i>P. aeruginosa</i> |
| <i>Pseudomonas aeruginosa</i> AR 0110     | Complete Genome | GCF_003204335.1 | <i>P. aeruginosa</i> |
| <i>Pseudomonas aeruginosa</i> K34-7       | Complete Genome | GCF_003206535.1 | <i>P. aeruginosa</i> |
| <i>Pseudomonas aeruginosa</i> AR 460      | Complete Genome | GCF_003288335.1 | <i>P. aeruginosa</i> |

|                                            |                 |                 |                      |
|--------------------------------------------|-----------------|-----------------|----------------------|
| <i>Pseudomonas aeruginosa</i> AR 455       | Complete Genome | GCF_003288355.1 | <i>P. aeruginosa</i> |
| <i>Pseudomonas aeruginosa</i> AR 458       | Complete Genome | GCF_003288435.1 | <i>P. aeruginosa</i> |
| <i>Pseudomonas aeruginosa</i> HS9          | Complete Genome | GCF_003319235.1 | <i>P. aeruginosa</i> |
| <i>Pseudomonas aeruginosa</i> PA34         | Complete Genome | GCF_003332705.2 | <i>P. aeruginosa</i> |
| <i>Pseudomonas aeruginosa</i> Y89          | Complete Genome | GCF_003369735.1 | <i>P. aeruginosa</i> |
| <i>Pseudomonas aeruginosa</i> Y82          | Complete Genome | GCF_003369755.1 | <i>P. aeruginosa</i> |
| <i>Pseudomonas aeruginosa</i> Y31          | Complete Genome | GCF_003369775.1 | <i>P. aeruginosa</i> |
| <i>Pseudomonas aeruginosa</i> Y71          | Complete Genome | GCF_003408495.1 | <i>P. aeruginosa</i> |
| <i>Pseudomonas aeruginosa</i> PABL048      | Complete Genome | GCF_003411785.2 | <i>P. aeruginosa</i> |
| <i>Pseudomonas aeruginosa</i> PABL012      | Complete Genome | GCF_003429185.1 | <i>P. aeruginosa</i> |
| <i>Pseudomonas aeruginosa</i> PABL017      | Complete Genome | GCF_003429205.1 | <i>P. aeruginosa</i> |
| <i>Pseudomonas aeruginosa</i> 24Pae112     | Complete Genome | GCF_003433235.1 | <i>P. aeruginosa</i> |
| <i>Pseudomonas aeruginosa</i> N15-01092    | Complete Genome | GCF_003571505.1 | <i>P. aeruginosa</i> |
| <i>Pseudomonas aeruginosa</i> AR 0111      | Complete Genome | GCF_003571805.1 | <i>P. aeruginosa</i> |
| <i>Pseudomonas aeruginosa</i> BA7823       | Complete Genome | GCF_003626935.1 | <i>P. aeruginosa</i> |
| <i>Pseudomonas aeruginosa</i> 268          | Complete Genome | GCF_003641125.1 | <i>P. aeruginosa</i> |
| <i>Pseudomonas aeruginosa</i> 6762         | Chromosome      | GCF_003665495.1 | <i>P. aeruginosa</i> |
| <i>Pseudomonas aeruginosa</i> SP4528       | Complete Genome | GCF_003716765.1 | <i>P. aeruginosa</i> |
| <i>Pseudomonas aeruginosa</i> BH9          | Chromosome      | GCF_003795165.1 | <i>P. aeruginosa</i> |
| <i>Pseudomonas aeruginosa</i> H26027       | Complete Genome | GCF_003798105.1 | <i>P. aeruginosa</i> |
| <i>Pseudomonas aeruginosa</i> H25883       | Complete Genome | GCF_003798125.1 | <i>P. aeruginosa</i> |
| <i>Pseudomonas aeruginosa</i> H26023       | Complete Genome | GCF_003798145.1 | <i>P. aeruginosa</i> |
| <i>Pseudomonas aeruginosa</i> FDAARGOS 532 | Complete Genome | GCF_003812165.1 | <i>P. aeruginosa</i> |
| <i>Pseudomonas aeruginosa</i> FDAARGOS 571 | Complete Genome | GCF_003812885.1 | <i>P. aeruginosa</i> |
| <i>Pseudomonas aeruginosa</i> FDAARGOS 501 | Complete Genome | GCF_003812905.1 | <i>P. aeruginosa</i> |
| <i>Pseudomonas aeruginosa</i> FDAARGOS 505 | Complete Genome | GCF_003813005.1 | <i>P. aeruginosa</i> |
| <i>Pseudomonas aeruginosa</i> FDAARGOS 570 | Complete Genome | GCF_003813025.1 | <i>P. aeruginosa</i> |
| <i>Pseudomonas aeruginosa</i> IMP-13       | Complete Genome | GCF_003950015.1 | <i>P. aeruginosa</i> |

|                                               |                 |                 |                      |
|-----------------------------------------------|-----------------|-----------------|----------------------|
| <i>Pseudomonas aeruginosa</i> SP4371          | Complete Genome | GCF_003950255.1 | <i>P. aeruginosa</i> |
| <i>Pseudomonas aeruginosa</i> SP2230          | Complete Genome | GCF_003952285.1 | <i>P. aeruginosa</i> |
| <i>Pseudomonas aeruginosa</i> B14130          | Complete Genome | GCF_003952305.1 | <i>P. aeruginosa</i> |
| <i>Pseudomonas aeruginosa</i> B17932          | Complete Genome | GCF_003952325.1 | <i>P. aeruginosa</i> |
| <i>Pseudomonas aeruginosa</i> GIMC5015 PAKB6  | Complete Genome | GCF_003957825.1 | <i>P. aeruginosa</i> |
| <i>Pseudomonas aeruginosa</i> SP4527          | Complete Genome | GCF_003991465.1 | <i>P. aeruginosa</i> |
| <i>Pseudomonas aeruginosa</i> GIMC5016 PA1840 | Chromosome      | GCF_004000495.1 | <i>P. aeruginosa</i> |
| <i>Pseudomonas aeruginosa</i> LW              | Complete Genome | GCF_004010895.1 | <i>P. aeruginosa</i> |
| <i>Pseudomonas aeruginosa</i> PAO1161         | Complete Genome | GCF_004102665.1 | <i>P. aeruginosa</i> |
| <i>Pseudomonas aeruginosa</i> 1334/14         | Complete Genome | GCF_004193735.1 | <i>P. aeruginosa</i> |
| <i>Pseudomonas aeruginosa</i> E80             | Complete Genome | GCF_004291075.1 | <i>P. aeruginosa</i> |
| <i>Pseudomonas aeruginosa</i> PA-VAP-3        | Chromosome      | GCF_004346985.1 | <i>P. aeruginosa</i> |
| <i>Pseudomonas aeruginosa</i> PA-VAP-1        | Chromosome      | GCF_004347005.1 | <i>P. aeruginosa</i> |
| <i>Pseudomonas aeruginosa</i> PA-VAP-2        | Chromosome      | GCF_004347025.1 | <i>P. aeruginosa</i> |
| <i>Pseudomonas aeruginosa</i> PA-VAP-4        | Chromosome      | GCF_004347045.1 | <i>P. aeruginosa</i> |
| <i>Pseudomonas aeruginosa</i> AES1M           | Complete Genome | GCF_004355125.1 | <i>P. aeruginosa</i> |
| <i>Pseudomonas aeruginosa</i> AES1R           | Complete Genome | GCF_004355145.1 | <i>P. aeruginosa</i> |
| <i>Pseudomonas aeruginosa</i> AJ D 2          | Chromosome      | GCF_004769055.1 | <i>P. aeruginosa</i> |
| <i>Pseudomonas aeruginosa</i> PRD-10          | Chromosome      | GCF_005154325.1 | <i>P. aeruginosa</i> |
| <i>Pseudomonas aeruginosa</i> PA298           | Complete Genome | GCF_005305005.1 | <i>P. aeruginosa</i> |
| <i>Pseudomonas aeruginosa</i> FDAARGOS 767    | Complete Genome | GCF_006364735.1 | <i>P. aeruginosa</i> |
| <i>Pseudomonas aeruginosa</i> FDAARGOS 610    | Complete Genome | GCF_006364795.1 | <i>P. aeruginosa</i> |
| <i>Pseudomonas aeruginosa</i> AZPAE15042      | Complete Genome | GCF_006971785.1 | <i>P. aeruginosa</i> |
| <i>Pseudomonas aeruginosa</i> 60503           | Complete Genome | GCF_007559065.1 | <i>P. aeruginosa</i> |
| <i>Pseudomonas aeruginosa</i> A681            | Complete Genome | GCF_007559085.1 | <i>P. aeruginosa</i> |
| <i>Pseudomonas aeruginosa</i> 519119          | Complete Genome | GCF_007559105.1 | <i>P. aeruginosa</i> |
| <i>Pseudomonas aeruginosa</i> 243931          | Complete Genome | GCF_007559125.1 | <i>P. aeruginosa</i> |
| <i>Pseudomonas aeruginosa</i> SCAID WND2-2019 | Chromosome      | GCF_007566955.1 | <i>P. aeruginosa</i> |
| <i>Pseudomonas aeruginosa</i> SCAID WND3-2019 | Chromosome      | GCF_007567125.1 | <i>P. aeruginosa</i> |
| <i>Pseudomonas aeruginosa</i> SCAID WND1-2019 | Chromosome      | GCF_007567285.1 | <i>P. aeruginosa</i> |
| <i>Pseudomonas aeruginosa</i> C79             | Complete Genome | GCF_007833895.1 | <i>P. aeruginosa</i> |
| <i>Pseudomonas aeruginosa</i> IMP67           | Complete Genome | GCF_008033725.1 | <i>P. aeruginosa</i> |

|                                                |                 |                 |                      |
|------------------------------------------------|-----------------|-----------------|----------------------|
| <i>Pseudomonas aeruginosa</i> IMP68            | Complete Genome | GCF_008033745.1 | <i>P. aeruginosa</i> |
| <i>Pseudomonas aeruginosa</i> IMP66            | Complete Genome | GCF_008033765.1 | <i>P. aeruginosa</i> |
| <i>Pseudomonas aeruginosa</i> CCUG 51971       | Complete Genome | GCF_008195485.1 | <i>P. aeruginosa</i> |
| <i>Pseudomonas aeruginosa</i> HOU1             | Complete Genome | GCF_008245185.1 | <i>P. aeruginosa</i> |
| <i>Pseudomonas aeruginosa</i> GIMC5001 PAT-23  | Chromosome      | GCF_008330985.1 | <i>P. aeruginosa</i> |
| <i>Pseudomonas aeruginosa</i> GIMC5002 PAT-169 | Chromosome      | GCF_008370085.1 | <i>P. aeruginosa</i> |
| <i>Pseudomonas aeruginosa</i> E90              | Complete Genome | GCF_008705235.1 | <i>P. aeruginosa</i> |
| <i>Pseudomonas aeruginosa</i> PA59             | Complete Genome | GCF_009497675.1 | <i>P. aeruginosa</i> |
| <i>Pseudomonas aeruginosa</i> CFSAN084950      | Complete Genome | GCF_009648875.1 | <i>P. aeruginosa</i> |
| <i>Pseudomonas aeruginosa</i> AG1              | Complete Genome | GCF_009662315.1 | <i>P. aeruginosa</i> |
| <i>Pseudomonas aeruginosa</i> ST773            | Complete Genome | GCF_009664165.1 | <i>P. aeruginosa</i> |
| <i>Pseudomonas aeruginosa</i> 1811-13R031      | Complete Genome | GCF_009676765.1 | <i>P. aeruginosa</i> |
| <i>Pseudomonas aeruginosa</i> 1811-18R001      | Complete Genome | GCF_009676785.1 | <i>P. aeruginosa</i> |
| <i>Pseudomonas aeruginosa</i> KRP1             | Complete Genome | GCF_009676885.1 | <i>P. aeruginosa</i> |
| <i>Pseudomonas aeruginosa</i> T2436            | Complete Genome | GCF_009720405.1 | <i>P. aeruginosa</i> |
| <i>Pseudomonas aeruginosa</i> T2101            | Complete Genome | GCF_009720425.1 | <i>P. aeruginosa</i> |
| <i>Pseudomonas aeruginosa</i> delta6 2         | Chromosome      | GCF_009799985.1 | <i>P. aeruginosa</i> |
| <i>Pseudomonas aeruginosa</i> delta6 3         | Chromosome      | GCF_009800005.1 | <i>P. aeruginosa</i> |
| <i>Pseudomonas aeruginosa</i> delta6 4         | Chromosome      | GCF_009800025.1 | <i>P. aeruginosa</i> |
| <i>Pseudomonas aeruginosa</i> delta6 5         | Chromosome      | GCF_009800045.1 | <i>P. aeruginosa</i> |
| <i>Pseudomonas aeruginosa</i> delta6 6         | Chromosome      | GCF_009800065.1 | <i>P. aeruginosa</i> |
| <i>Pseudomonas aeruginosa</i> delta10          | Chromosome      | GCF_009800085.1 | <i>P. aeruginosa</i> |
| <i>Pseudomonas aeruginosa</i> Cas9 1           | Chromosome      | GCF_009800105.1 | <i>P. aeruginosa</i> |
| <i>Pseudomonas aeruginosa</i> Cas9 2           | Chromosome      | GCF_009800125.1 | <i>P. aeruginosa</i> |
| <i>Pseudomonas aeruginosa</i> Environ 1        | Chromosome      | GCF_009800145.1 | <i>P. aeruginosa</i> |
| <i>Pseudomonas aeruginosa</i> Environ 2        | Chromosome      | GCF_009800165.1 | <i>P. aeruginosa</i> |
| <i>Pseudomonas aeruginosa</i> YB01             | Complete Genome | GCF_009867055.1 | <i>P. aeruginosa</i> |
| <i>Pseudomonas aeruginosa</i> INP-43           | Complete Genome | GCF_009905195.1 | <i>P. aeruginosa</i> |
| <i>Pseudomonas aeruginosa</i> RD1-3            | Complete Genome | GCF_009911735.1 | <i>P. aeruginosa</i> |
| <i>Pseudomonas aeruginosa</i> PAO1 Orsay       | Complete Genome | GCF_900070375.1 | <i>P. aeruginosa</i> |
| <i>Pseudomonas aeruginosa</i> PA14Or reads     | Complete Genome | GCF_900095805.1 | <i>P. aeruginosa</i> |
| <i>Pseudomonas aeruginosa</i> PcyII-10         | Complete Genome | GCF_900149285.1 | <i>P. aeruginosa</i> |

|                                                   |                 |                 |                      |
|---------------------------------------------------|-----------------|-----------------|----------------------|
| <i>Pseudomonas aeruginosa</i> RW109               | Complete Genome | GCF_900243355.1 | <i>P. aeruginosa</i> |
| <i>Pseudomonas aeruginosa</i> 1                   | Complete Genome | GCF_900497025.1 | <i>P. aeruginosa</i> |
| <i>Pseudomonas aeruginosa</i> paerg000            | Complete Genome | GCF_900618245.1 | <i>P. aeruginosa</i> |
| <i>Pseudomonas aeruginosa</i> paerg002            | Complete Genome | GCF_900618255.1 | <i>P. aeruginosa</i> |
| <i>Pseudomonas aeruginosa</i> paerg004            | Complete Genome | GCF_900618265.1 | <i>P. aeruginosa</i> |
| <i>Pseudomonas aeruginosa</i> paerg003            | Complete Genome | GCF_900618275.1 | <i>P. aeruginosa</i> |
| <i>Pseudomonas aeruginosa</i> paerg005            | Complete Genome | GCF_900618285.1 | <i>P. aeruginosa</i> |
| <i>Pseudomonas aeruginosa</i> paerg009            | Complete Genome | GCF_900618305.1 | <i>P. aeruginosa</i> |
| <i>Pseudomonas aeruginosa</i> paerg010            | Complete Genome | GCF_900618315.1 | <i>P. aeruginosa</i> |
| <i>Pseudomonas aeruginosa</i> paerg011            | Complete Genome | GCF_900618325.1 | <i>P. aeruginosa</i> |
| <i>Pseudomonas aeruginosa</i> paerg012            | Complete Genome | GCF_900618335.1 | <i>P. aeruginosa</i> |
| <i>Pseudomonas aeruginosa</i> NCTC11445           | Complete Genome | GCF_900636735.1 | <i>P. aeruginosa</i> |
| <i>Pseudomonas aeruginosa</i> NCTC12903           | Complete Genome | GCF_900636755.1 | <i>P. aeruginosa</i> |
| <i>Pseudomonas aeruginosa</i> NCTC13715           | Complete Genome | GCF_900636975.1 | <i>P. aeruginosa</i> |
| <i>Pseudomonas aeruginosa</i> NCTC10728           | Complete Genome | GCF_900637045.1 | <i>P. aeruginosa</i> |
| <i>Pseudomonas aeruginosa</i> NCTC13359           | Complete Genome | GCF_901472545.1 | <i>P. aeruginosa</i> |
| <i>Pseudomonas aeruginosa</i> NCTC13620           | Complete Genome | GCF_901472565.1 | <i>P. aeruginosa</i> |
| <i>Pseudomonas aeruginosa</i> NCTC13618           | Complete Genome | GCF_901472595.1 | <i>P. aeruginosa</i> |
| <i>Pseudomonas aeruginosa</i> PcyII-29            | Complete Genome | GCF_902703185.1 | <i>P. aeruginosa</i> |
| <i>Pseudomonas aeruginosa</i> PcyII-40            | Complete Genome | GCF_902703195.1 | <i>P. aeruginosa</i> |
| <i>Pseudomonas aeruginosa</i> C7-25               | Complete Genome | GCF_902703215.1 | <i>P. aeruginosa</i> |
| <i>Pseudomonas aeruginosa</i> 19BR                | Chromosome      | GCF_000223945.1 | <i>P. aeruginosa</i> |
| <i>Pseudomonas aeruginosa</i> 213BR               | Chromosome      | GCF_000223965.1 | <i>P. aeruginosa</i> |
| <i>Pseudomonas aeruginosa</i> 39016               | Chromosome      | GCF_000148745.1 | <i>P. aeruginosa</i> |
| <i>Pseudomonas aeruginosa</i> B136-33             | Complete Genome | GCF_000359505.1 | <i>P. aeruginosa</i> |
| <i>Pseudomonas aeruginosa</i> c7447m              | Chromosome      | GCF_000468935.2 | <i>P. aeruginosa</i> |
| <i>Pseudomonas aeruginosa</i> C-NN2               | Complete Genome | GCF_900185255.1 | <i>P. aeruginosa</i> |
| <i>Pseudomonas aeruginosa</i> DHS01               | Complete Genome | GCF_000496455.2 | <i>P. aeruginosa</i> |
| <i>Pseudomonas aeruginosa</i> DK1 substr NH57388A | Complete Genome | GCF_900069025.1 | <i>P. aeruginosa</i> |

|                                                    |                 |                 |                      |
|----------------------------------------------------|-----------------|-----------------|----------------------|
| <i>Pseudomonas aeruginosa</i> DK2                  | Complete Genome | GCF_000271365.1 | <i>P. aeruginosa</i> |
| <i>Pseudomonas aeruginosa</i> DSM 50071 NBRC 12689 | Complete Genome | GCF_001045685.1 | <i>P. aeruginosa</i> |
| <i>Pseudomonas aeruginosa</i> LES400               | Chromosome      | GCF_000583935.1 | <i>P. aeruginosa</i> |
| <i>Pseudomonas aeruginosa</i> LES431               | Complete Genome | GCF_000508765.1 | <i>P. aeruginosa</i> |
| <i>Pseudomonas aeruginosa</i> LESB58               | Complete Genome | GCF_000026645.1 | <i>P. aeruginosa</i> |
| <i>Pseudomonas aeruginosa</i> LESB65               | Chromosome      | GCF_000583955.1 | <i>P. aeruginosa</i> |
| <i>Pseudomonas aeruginosa</i> LESlike1             | Chromosome      | GCF_000583975.1 | <i>P. aeruginosa</i> |
| <i>Pseudomonas aeruginosa</i> LESlike4             | Chromosome      | GCF_000583995.1 | <i>P. aeruginosa</i> |
| <i>Pseudomonas aeruginosa</i> LESlike5             | Chromosome      | GCF_000583895.1 | <i>P. aeruginosa</i> |
| <i>Pseudomonas aeruginosa</i> LESlike7             | Chromosome      | GCF_000583915.1 | <i>P. aeruginosa</i> |
| <i>Pseudomonas aeruginosa</i> M18                  | Complete Genome | GCF_000226155.1 | <i>P. aeruginosa</i> |
| <i>Pseudomonas aeruginosa</i> MTB-1                | Complete Genome | GCF_000504045.1 | <i>P. aeruginosa</i> |
| <i>Pseudomonas aeruginosa</i> NCGM2 S1             | Complete Genome | GCF_000284555.1 | <i>P. aeruginosa</i> |
| <i>Pseudomonas aeruginosa</i> PA1                  | Complete Genome | GCF_000496605.2 | <i>P. aeruginosa</i> |
| <i>Pseudomonas aeruginosa</i> PA1R                 | Complete Genome | GCF_000496645.1 | <i>P. aeruginosa</i> |
| <i>Pseudomonas aeruginosa</i> PA7                  | Complete Genome | GCF_000017205.1 | <i>P. aeruginosa</i> |
| <i>Pseudomonas aeruginosa</i> PA96                 | Chromosome      | GCF_000626655.2 | <i>P. aeruginosa</i> |
| <i>Pseudomonas aeruginosa</i> PACS2                | Chromosome      | GCF_000168335.1 | <i>P. aeruginosa</i> |
| <i>Pseudomonas aeruginosa</i> PAK                  | Complete Genome | GCF_902172305.1 | <i>P. aeruginosa</i> |
| <i>Pseudomonas aeruginosa</i> PAO1                 | Complete Genome | GCF_000006765.1 | <i>P. aeruginosa</i> |
| <i>Pseudomonas aeruginosa</i> PAO1H2O              | Chromosome      | GCF_000714515.1 | <i>P. aeruginosa</i> |
| <i>Pseudomonas aeruginosa</i> PAO1-VE13            | Chromosome      | GCF_000484545.2 | <i>P. aeruginosa</i> |
| <i>Pseudomonas aeruginosa</i> PAO1-VE2             | Chromosome      | GCF_000484495.2 | <i>P. aeruginosa</i> |
| <i>Pseudomonas aeruginosa</i> PAO581               | Chromosome      | GCF_000468555.2 | <i>P. aeruginosa</i> |
| <i>Pseudomonas aeruginosa</i> RP73                 | Complete Genome | GCF_000414035.1 | <i>P. aeruginosa</i> |
| <i>Pseudomonas aeruginosa</i> SCV20265             | Complete Genome | GCF_000510305.1 | <i>P. aeruginosa</i> |
| <i>Pseudomonas aeruginosa</i> SJTD-1               | Complete Genome | GCF_000271985.2 | <i>P. aeruginosa</i> |
| <i>Pseudomonas aeruginosa</i> UCBPP-PA14           | Complete Genome | GCF_000014625.1 | <i>P. aeruginosa</i> |
| <i>Pseudomonas aeruginosa</i> VRFPA04              | Complete Genome | GCF_000473745.2 | <i>P. aeruginosa</i> |
| <i>Pseudomonas aeruginosa</i> YL84                 | Complete Genome | GCF_000524595.1 | <i>P. aeruginosa</i> |
| <i>Pseudomonas agarici</i> NCPPB 2472              | Chromosome      | GCF_001543125.1 | <i>P. asplenii</i>   |
| <i>Pseudomonas alcaligenes</i> NEB 585             | Complete Genome | GCF_001597285.1 |                      |
| <i>Pseudomonas alcaliphila</i> JAB1                | Complete Genome | GCF_001941865.1 | <i>P. oleovorans</i> |

|                                                                              |                 |                 |                        |
|------------------------------------------------------------------------------|-----------------|-----------------|------------------------|
| <i>Pseudomonas alkylphenolica</i> KL28                                       | Complete Genome | GCF_000746525.1 | <i>P. putida</i>       |
| <i>Pseudomonas alkylphenolica</i> Neo                                        | Complete Genome | GCF_009755645.1 | <i>P. putida</i>       |
| <i>Pseudomonas amygdali</i> pv <i>lachrymans</i> NM002                       | Complete Genome | GCF_002068135.1 | <i>P. syringae</i>     |
| <i>Pseudomonas amygdali</i> pv <i>lachrymans</i> str M301315                 | Complete Genome | GCF_000146005.2 | <i>P. syringae</i>     |
| <i>Pseudomonas amygdali</i> pv <i>morsprunorum</i> R15244                    | Complete Genome | GCF_002905685.2 | <i>P. syringae</i>     |
| <i>Pseudomonas amygdali</i> pv <i>tabaci</i> str ATCC 11528                  | Complete Genome | GCF_000145945.2 | <i>P. syringae</i>     |
| <i>Pseudomonas antarctica</i> PAMC 27494                                     | Complete Genome | GCF_001647715.1 | <i>P. fluorescens</i>  |
| <i>Pseudomonas antarctica</i> LMG 22709                                      | Chromosome      | GCF_900103795.1 | <i>P. fluorescens</i>  |
| <i>Pseudomonas arsenicoxydans</i> CECT 7543                                  | Chromosome      | GCF_900103875.1 | <i>P. mandelii</i>     |
| <i>Pseudomonas asplenii</i> ATCC 23835                                       | Chromosome      | GCF_900105475.1 | <i>P. asplenii</i>     |
| <i>Pseudomonas asturiensis</i> CC1524                                        | Complete Genome | GCF_000452745.2 | <i>P. syringae</i>     |
| <i>Pseudomonas avellanae</i> R2leaf                                          | Complete Genome | GCF_002905795.2 | <i>P. syringae</i>     |
| <i>Pseudomonas azotoformans</i> S4                                           | Complete Genome | GCF_001579805.1 | <i>P. fluorescens</i>  |
| <i>Pseudomonas azotoformans</i> F77                                          | Complete Genome | GCF_002007785.1 | <i>P. fluorescens</i>  |
| <i>Pseudomonas azotoformans</i> P45A                                         | Complete Genome | GCF_006547025.1 | <i>P. fluorescens</i>  |
| <i>Pseudomonas azotoformans</i> LMG 21611                                    | Chromosome      | GCF_900103345.1 | <i>P. fluorescens</i>  |
| <i>Pseudomonas balearica</i> DSM 6083 SP1402                                 | Complete Genome | GCF_000818015.1 | <i>P. stutzeri</i>     |
| <i>Pseudomonas brassicacearum</i> DF41                                       | Complete Genome | GCF_000585995.1 | <i>P. corrugata</i>    |
| <i>Pseudomonas brassicacearum</i> LBUM300                                    | Complete Genome | GCF_001449085.1 | <i>P. corrugata</i>    |
| <i>Pseudomonas brassicacearum</i> L13-6-12                                   | Complete Genome | GCF_001746815.1 | <i>P. corrugata</i>    |
| <i>Pseudomonas brassicacearum</i> 3Re2-7                                     | Complete Genome | GCF_008370715.1 | <i>P. corrugata</i>    |
| <i>Pseudomonas brassicacearum</i> S-1                                        | Complete Genome | GCF_009601685.1 | <i>P. corrugata</i>    |
| <i>Pseudomonas brassicacearum</i> LMG 21623                                  | Chromosome      | GCF_900103245.1 | <i>P. corrugata</i>    |
| <i>Pseudomonas brassicacearum</i> subsp <i>brassicacearum</i> NFM421         | Complete Genome | GCF_000194805.1 | <i>P. corrugata</i>    |
| <i>Pseudomonas brenneri</i> DSM 15294                                        | Chromosome      | GCF_900105815.1 | <i>P. gessardii</i>    |
| <i>Pseudomonas cedrina</i> LMG 23661                                         | Chromosome      | GCF_900104915.1 | <i>P. fluorescens</i>  |
| <i>Pseudomonas cerasi</i> Sour cherry <i>Prunus cerasus</i> symptomatic leaf | Complete Genome | GCF_900074915.1 | <i>P. syringae</i>     |
| <i>Pseudomonas cerasi</i> PL963                                              | Complete Genome | GCF_900235895.1 | <i>P. syringae</i>     |
| <i>Pseudomonas chlororaphis</i> PA23                                         | Complete Genome | GCF_000698865.1 | <i>P. chlororaphis</i> |
| <i>Pseudomonas chlororaphis</i> PCL1606                                      | Complete Genome | GCF_000963835.1 | <i>P. chlororaphis</i> |

|                                                                   |                 |                 |                        |
|-------------------------------------------------------------------|-----------------|-----------------|------------------------|
| <i>Pseudomonas chlororaphis</i> UFB2                              | Complete Genome | GCF_001023535.1 | <i>P. corrugata</i>    |
| <i>Pseudomonas chlororaphis</i> 189                               | Complete Genome | GCF_001602135.1 | <i>P. chlororaphis</i> |
| <i>Pseudomonas chlororaphis</i> Lzh-T5                            | Complete Genome | GCF_002844145.1 | <i>P. chlororaphis</i> |
| <i>Pseudomonas chlororaphis</i> TAMOak81                          | Complete Genome | GCF_003850605.1 | <i>P. chlororaphis</i> |
| <i>Pseudomonas chlororaphis</i> ATCC 17415                        | Complete Genome | GCF_003851145.1 | <i>P. chlororaphis</i> |
| <i>Pseudomonas chlororaphis</i> Pb-St2                            | Complete Genome | GCF_003851785.1 | <i>P. chlororaphis</i> |
| <i>Pseudomonas chlororaphis</i> B25                               | Complete Genome | GCF_003851985.1 | <i>P. chlororaphis</i> |
| <i>Pseudomonas chlororaphis</i> R47                               | Complete Genome | GCF_009834495.1 | <i>P. chlororaphis</i> |
| <i>Pseudomonas chlororaphis</i> ATCC 13985                        | Chromosome      | GCF_900104715.1 | <i>P. chlororaphis</i> |
| <i>Pseudomonas chlororaphis</i> LMG 21630                         | Chromosome      | GCF_900104985.1 | <i>P. chlororaphis</i> |
| <i>Pseudomonas chlororaphis</i> DSM 21509                         | Chromosome      | GCF_900104995.1 | <i>P. chlororaphis</i> |
| <i>Pseudomonas chlororaphis</i> NCTC7357                          | Complete Genome | GCF_900636995.1 | <i>P. chlororaphis</i> |
| <i>Pseudomonas chlororaphis</i> O6                                | Chromosome      | GCF_000264555.1 | <i>P. chlororaphis</i> |
| <i>Pseudomonas chlororaphis</i> subsp <i>aurantiaca</i> JD37      | Complete Genome | GCF_000761195.1 | <i>P. chlororaphis</i> |
| <i>Pseudomonas chlororaphis</i> subsp <i>aurantiaca</i> StFRB508  | Complete Genome | GCF_002355875.1 | <i>P. chlororaphis</i> |
| <i>Pseudomonas chlororaphis</i> subsp <i>aurantiaca</i> M12       | Complete Genome | GCF_003851165.1 | <i>P. chlororaphis</i> |
| <i>Pseudomonas chlororaphis</i> subsp <i>aurantiaca</i> 449       | Complete Genome | GCF_003851205.1 | <i>P. chlororaphis</i> |
| <i>Pseudomonas chlororaphis</i> subsp <i>aurantiaca</i> CW2       | Complete Genome | GCF_003851225.1 | <i>P. chlororaphis</i> |
| <i>Pseudomonas chlororaphis</i> subsp <i>aurantiaca</i> M71       | Complete Genome | GCF_003851265.1 | <i>P. chlororaphis</i> |
| <i>Pseudomonas chlororaphis</i> subsp <i>aurantiaca</i> K27       | Complete Genome | GCF_003851285.1 | <i>P. chlororaphis</i> |
| <i>Pseudomonas chlororaphis</i> subsp <i>aurantiaca</i> PCM 2210  | Complete Genome | GCF_003851305.1 | <i>P. chlororaphis</i> |
| <i>Pseudomonas chlororaphis</i> subsp <i>aurantiaca</i> Q16       | Complete Genome | GCF_003851345.1 | <i>P. chlororaphis</i> |
| <i>Pseudomonas chlororaphis</i> subsp <i>aurantiaca</i> 464       | Complete Genome | GCF_003851805.1 | <i>P. chlororaphis</i> |
| <i>Pseudomonas chlororaphis</i> subsp <i>aurantiaca</i> DSM 19603 | Complete Genome | GCF_003851835.1 | <i>P. chlororaphis</i> |
| <i>Pseudomonas chlororaphis</i> subsp <i>aurantiaca</i> ARS 38    | Complete Genome | GCF_009362955.1 | <i>P. chlororaphis</i> |
| <i>Pseudomonas chlororaphis</i> subsp <i>aurantiaca</i> zm-1      | Complete Genome | GCF_010092525.1 | <i>P. chlororaphis</i> |
| <i>Pseudomonas chlororaphis</i> subsp <i>aureofaciens</i> P2      | Complete Genome | GCF_003851365.1 | <i>P. chlororaphis</i> |
| <i>Pseudomonas chlororaphis</i> subsp <i>aureofaciens</i> C50     | Complete Genome | GCF_003851385.1 | <i>P. chlororaphis</i> |
| <i>Pseudomonas chlororaphis</i> subsp <i>aureofaciens</i> 66      | Complete Genome | GCF_003851405.1 | <i>P. chlororaphis</i> |

|                                                                       |                 |                 |                         |
|-----------------------------------------------------------------------|-----------------|-----------------|-------------------------|
| <i>Pseudomonas chlororaphis</i> subsp <i>aureofaciens</i> ChPhzS23    | Complete Genome | GCF_003851425.1 | <i>P. chlororaphis</i>  |
| <i>Pseudomonas chlororaphis</i> subsp <i>aureofaciens</i> ChPhzS24    | Complete Genome | GCF_003851445.1 | <i>P. chlororaphis</i>  |
| <i>Pseudomonas chlororaphis</i> subsp <i>aureofaciens</i> ChPhzTR36   | Complete Genome | GCF_003851865.1 | <i>P. chlororaphis</i>  |
| <i>Pseudomonas chlororaphis</i> subsp <i>aureofaciens</i> DSM 6698    | Complete Genome | GCF_003851905.1 | <i>P. chlororaphis</i>  |
| <i>Pseudomonas chlororaphis</i> subsp <i>aureofaciens</i> ChPhzTR39   | Complete Genome | GCF_003851925.1 | <i>P. chlororaphis</i>  |
| <i>Pseudomonas chlororaphis</i> subsp <i>aureofaciens</i> ChPhzTR18   | Complete Genome | GCF_003851955.1 | <i>P. chlororaphis</i>  |
| <i>Pseudomonas chlororaphis</i> subsp <i>aureofaciens</i> ChPhzTR38   | Complete Genome | GCF_003852005.1 | <i>P. chlororaphis</i>  |
| <i>Pseudomonas chlororaphis</i> subsp <i>aureofaciens</i> 30-84 30-84 | Chromosome      | GCF_000281915.1 | <i>P. chlororaphis</i>  |
| <i>Pseudomonas chlororaphis</i> subsp <i>chlororaphis</i> DSM 50083   | Complete Genome | GCF_003945765.1 | <i>P. chlororaphis</i>  |
| <i>Pseudomonas chlororaphis</i> subsp <i>piscium</i> ZJU60            | Complete Genome | GCF_003008635.1 | <i>P. chlororaphis</i>  |
| <i>Pseudomonas chlororaphis</i> subsp <i>piscium</i> DSM 21509        | Complete Genome | GCF_003850345.1 | <i>P. chlororaphis</i>  |
| <i>Pseudomonas chlororaphis</i> subsp <i>piscium</i> ATCC 17809       | Complete Genome | GCF_003850365.1 | <i>P. chlororaphis</i>  |
| <i>Pseudomonas chlororaphis</i> subsp <i>piscium</i> ATCC 17411       | Complete Genome | GCF_003850385.1 | <i>P. chlororaphis</i>  |
| <i>Pseudomonas chlororaphis</i> subsp <i>piscium</i> SLPH10           | Complete Genome | GCF_003850405.1 | <i>P. chlororaphis</i>  |
| <i>Pseudomonas chlororaphis</i> subsp <i>piscium</i> DTR133           | Complete Genome | GCF_003850425.1 | <i>P. chlororaphis</i>  |
| <i>Pseudomonas chlororaphis</i> subsp <i>piscium</i> PCL1391          | Complete Genome | GCF_003850445.1 | <i>P. chlororaphis</i>  |
| <i>Pseudomonas chlororaphis</i> subsp <i>piscium</i> PCL1607          | Complete Genome | GCF_003850465.1 | <i>P. chlororaphis</i>  |
| <i>Pseudomonas chlororaphis</i> subsp <i>piscium</i> ChPhzS135        | Complete Genome | GCF_003850485.1 | <i>P. chlororaphis</i>  |
| <i>Pseudomonas chlororaphis</i> subsp <i>piscium</i> ChPhzS140        | Complete Genome | GCF_003850505.1 | <i>P. chlororaphis</i>  |
| <i>Pseudomonas chlororaphis</i> subsp <i>piscium</i> ChPhzTR44        | Complete Genome | GCF_003850525.1 | <i>P. chlororaphis</i>  |
| <i>Pseudomonas chlororaphis</i> subsp <i>piscium</i> ToZa7            | Complete Genome | GCF_003850585.1 | <i>P. chlororaphis</i>  |
| <i>Pseudomonas cichorii</i> JBC1                                      | Complete Genome | GCF_000517305.1 | <i>P. syringae</i>      |
| <i>Pseudomonas citronellolis</i> P3B5                                 | Complete Genome | GCF_001586155.1 | <i>P. nitroreducens</i> |
| <i>Pseudomonas citronellolis</i> SJTE-3                               | Complete Genome | GCF_001654435.1 | <i>P. nitroreducens</i> |
| <i>Pseudomonas coronafaciens</i> pv <i>oryzae</i> str 1 6             | Complete Genome | GCF_000156995.2 | <i>P. syringae</i>      |
| <i>Pseudomonas corrugata</i> RM1-1-4                                  | Complete Genome | GCF_001708425.1 | <i>P. corrugata</i>     |
| <i>Pseudomonas corrugata</i> LMG 2172                                 | Chromosome      | GCF_900106085.1 | <i>P. corrugata</i>     |
| <i>Pseudomonas cremoricolorata</i> ND07                               | Complete Genome | GCF_000759535.1 | <i>P. putida</i>        |

|                                                        |                 |                 |                         |
|--------------------------------------------------------|-----------------|-----------------|-------------------------|
| <i>Pseudomonas denitrificans</i> nomen rejiciendum BG1 | Complete Genome | GCF_008807415.1 | <i>P. nitroreducens</i> |
| <i>Pseudomonas entomophila</i> 2014                    | Complete Genome | GCF_003940785.1 | <i>P. putida</i>        |
| <i>Pseudomonas entomophila</i> 1257                    | Complete Genome | GCF_003940825.1 | <i>P. putida</i>        |
| <i>Pseudomonas entomophila</i> L48 L48                 | Complete Genome | GCF_000026105.1 | <i>P. putida</i>        |
| <i>Pseudomonas extremaustralis</i> DSM 17835           | Chromosome      | GCF_900102035.1 | <i>P. fluorescens</i>   |
| <i>Pseudomonas extremorientalis</i> LMG 19695          | Chromosome      | GCF_900104365.1 | <i>P. fluorescens</i>   |
| <i>Pseudomonas fluorescens</i> UK4                     | Complete Genome | GCF_000730425.1 | <i>P. gessardii</i>     |
| <i>Pseudomonas fluorescens</i> FW300-N2E3              | Complete Genome | GCF_001307155.1 |                         |
| <i>Pseudomonas fluorescens</i> FW300-N2C3              | Complete Genome | GCF_001307275.1 | <i>P. corrugata</i>     |
| <i>Pseudomonas fluorescens</i> FW300-N2E2              | Chromosome      | GCF_001623525.1 | <i>P. corrugata</i>     |
| <i>Pseudomonas fluorescens</i> L321                    | Complete Genome | GCF_001708445.1 | <i>P. fluorescens</i>   |
| <i>Pseudomonas fluorescens</i> L111                    | Complete Genome | GCF_001708465.1 | <i>P. fluorescens</i>   |
| <i>Pseudomonas fluorescens</i> Pt14                    | Complete Genome | GCF_001747385.1 | <i>P. fluorescens</i>   |
| <i>Pseudomonas fluorescens</i> 2P24                    | Complete Genome | GCF_002865505.1 | <i>P. corrugata</i>     |
| <i>Pseudomonas fluorescens</i> FR1                     | Chromosome      | GCF_002879715.1 | <i>P. corrugata</i>     |
| <i>Pseudomonas fluorescens</i> MS82                    | Complete Genome | GCF_003055645.1 | <i>P. koreensis</i>     |
| <i>Pseudomonas fluorescens</i> NEP1                    | Chromosome      | GCF_003352875.1 | <i>P. koreensis</i>     |
| <i>Pseudomonas fluorescens</i> Pf275                   | Complete Genome | GCF_003410335.1 | <i>P. corrugata</i>     |
| <i>Pseudomonas fluorescens</i> SIK W1                  | Complete Genome | GCF_003612935.1 | <i>P. fluorescens</i>   |
| <i>Pseudomonas fluorescens</i> PF08                    | Complete Genome | GCF_003626995.1 | <i>P. gessardii</i>     |
| <i>Pseudomonas fluorescens</i> LBUM677                 | Complete Genome | GCF_004683905.1 | <i>P. koreensis</i>     |
| <i>Pseudomonas fluorescens</i> ATCC 13525              | Chromosome      | GCF_900215245.1 | <i>P. fluorescens</i>   |
| <i>Pseudomonas fluorescens</i> NCTC10038               | Complete Genome | GCF_900475215.1 | <i>P. fluorescens</i>   |
| <i>Pseudomonas fluorescens</i> NCTC10783               | Complete Genome | GCF_900636635.1 | <i>P. aeruginosa</i>    |
| <i>Pseudomonas fluorescens</i> NCTC9428                | Complete Genome | GCF_900636825.1 | <i>P. koreensis</i>     |
| <i>Pseudomonas fluorescens</i> A506                    | Complete Genome | GCF_000262325.2 | <i>P. fluorescens</i>   |
| <i>Pseudomonas fluorescens</i> F113                    | Complete Genome | GCF_000237065.1 | <i>P. corrugata</i>     |
| <i>Pseudomonas fluorescens</i> NCIMB 11764             | Complete Genome | GCF_000293885.2 | <i>P. mandelii</i>      |
| <i>Pseudomonas fluorescens</i> Pf0-1                   | Complete Genome | GCF_000012445.1 | <i>P. koreensis</i>     |
| <i>Pseudomonas fluorescens</i> Q2-87                   | Chromosome      | GCF_000281895.1 | <i>P. corrugata</i>     |
| <i>Pseudomonas fluorescens</i> Q8r1-96                 | Chromosome      | GCF_000263695.1 | <i>P. corrugata</i>     |

|                                                    |                 |                 |                         |
|----------------------------------------------------|-----------------|-----------------|-------------------------|
| <i>Pseudomonas fluorescens</i> R124                | Chromosome      | GCF_000292795.1 | <i>P. koreensis</i>     |
| <i>Pseudomonas fluorescens</i> SBW25               | Complete Genome | GCF_000009225.2 | <i>P. fluorescens</i>   |
| <i>Pseudomonas fluorescens</i> WH6                 | Chromosome      | GCF_000166515.1 | <i>P. fluorescens</i>   |
| <i>Pseudomonas fragi</i> P121                      | Complete Genome | GCF_001543265.1 | <i>P. fragi</i>         |
| <i>Pseudomonas fragi</i> NMC25                     | Complete Genome | GCF_002128325.1 | <i>P. fragi</i>         |
| <i>Pseudomonas fragi</i> DBC                       | Chromosome      | GCF_002205455.1 | <i>P. fragi</i>         |
| <i>Pseudomonas fragi</i> NRRL B-727                | Chromosome      | GCF_900105835.1 | <i>P. fragi</i>         |
| <i>Pseudomonas frederiksbergensis</i> ERDD5 01     | Complete Genome | GCF_001874645.1 |                         |
| <i>Pseudomonas frederiksbergensis</i> AS1          | Complete Genome | GCF_001952935.1 | <i>P. mandelii</i>      |
| <i>Pseudomonas frederiksbergensis</i> KNU-15       | Complete Genome | GCF_002355315.1 | <i>P. mandelii</i>      |
| <i>Pseudomonas fulva</i> SB1                       | Complete Genome | GCF_002688705.1 | <i>P. putida</i>        |
| <i>Pseudomonas fulva</i> FDAARGOS 167              | Complete Genome | GCF_002951475.1 | <i>P. putida</i>        |
| <i>Pseudomonas fulva</i> 12-X                      | Complete Genome | GCF_000213805.1 |                         |
| <i>Pseudomonas furukawaii</i> KF707                | Complete Genome | GCF_002355475.1 | <i>P. resinovorans</i>  |
| <i>Pseudomonas fuscovaginae</i> LMG 2158           | Chromosome      | GCF_900108595.1 | <i>P. asplenii</i>      |
| <i>Pseudomonas granadensis</i> LMG 27940           | Chromosome      | GCF_900105485.1 | <i>P. koreensis</i>     |
| <i>Pseudomonas guangdongensis</i> CCTCC AB 2012022 | Chromosome      | GCF_900105885.1 |                         |
| <i>Pseudomonas knackmussii</i> N1-2                | Complete Genome | GCF_009911755.1 | <i>P. nitroreducens</i> |
| <i>Pseudomonas knackmussii</i> B13                 | Complete Genome | GCF_000689415.1 | <i>P. nitroreducens</i> |
| <i>Pseudomonas koreensis</i> D26                   | Complete Genome | GCF_001605965.1 | <i>P. koreensis</i>     |
| <i>Pseudomonas koreensis</i> CRS05-R5              | Complete Genome | GCF_001654515.1 | <i>P. koreensis</i>     |
| <i>Pseudomonas koreensis</i> LMG 21318             | Chromosome      | GCF_900101415.1 | <i>P. koreensis</i>     |
| <i>Pseudomonas kribbensis</i> 46-2                 | Complete Genome | GCF_003352185.1 | <i>P. koreensis</i>     |
| <i>Pseudomonas lactis</i> SS101                    | Chromosome      | GCF_000263675.1 | <i>P. fluorescens</i>   |
| <i>Pseudomonas libanensis</i> DMSP-1               | Complete Genome | GCF_003952245.1 | <i>P. fluorescens</i>   |
| <i>Pseudomonas libanensis</i> DSM 17149            | Chromosome      | GCF_900101035.1 | <i>P. fluorescens</i>   |
| <i>Pseudomonas lini</i> DSM 16768                  | Chromosome      | GCF_900104735.1 | <i>P. mandelii</i>      |
| <i>Pseudomonas litoralis</i> 2SM5                  | Chromosome      | GCF_900105005.1 | <i>P. pertucinogena</i> |
| <i>Pseudomonas lundensis</i> AU1044                | Complete Genome | GCF_001020725.2 | <i>P. fragi</i>         |
| <i>Pseudomonas lurida</i> L228                     | Complete Genome | GCF_001708485.1 | <i>P. fluorescens</i>   |
| <i>Pseudomonas lurida</i> MYb11                    | Complete Genome | GCF_002966835.1 | <i>P. fluorescens</i>   |
| <i>Pseudomonas luteola</i> FDAARGOS 637            | Complete Genome | GCF_008693965.1 |                         |

|                                                    |                 |                 |                       |
|----------------------------------------------------|-----------------|-----------------|-----------------------|
| <i>Pseudomonas mandelii</i> LMG 21607              | Chromosome      | GCF_900106065.1 | <i>P. mandelii</i>    |
| <i>Pseudomonas mandelii</i> JR-1                   | Complete Genome | GCF_000257545.3 | <i>P. mandelii</i>    |
| <i>Pseudomonas marincola</i> YSy11                 | Complete Genome | GCF_900682675.1 |                       |
| <i>Pseudomonas mediterranea</i> DSM 16733          | Chromosome      | GCF_900106005.1 | <i>P. corrugata</i>   |
| <i>Pseudomonas mendocina</i> NSYSU                 | Complete Genome | GCF_002155165.1 | <i>P. oleovorans</i>  |
| <i>Pseudomonas mendocina</i> MAE1-K                | Complete Genome | GCF_002442555.1 | <i>P. oleovorans</i>  |
| <i>Pseudomonas mendocina</i> NEB698                | Complete Genome | GCF_003008615.1 | <i>P. oleovorans</i>  |
| <i>Pseudomonas mendocina</i> NCTC10897             | Complete Genome | GCF_900636545.1 | <i>P. oleovorans</i>  |
| <i>Pseudomonas mendocina</i> NK-01                 | Complete Genome | GCF_000204295.1 | <i>P. oleovorans</i>  |
| <i>Pseudomonas mendocina</i> S5 2                  | Complete Genome | GCF_000733715.2 | <i>P. oleovorans</i>  |
| <i>Pseudomonas mendocina</i> ymp                   | Complete Genome | GCF_000016565.1 | <i>P. oleovorans</i>  |
| <i>Pseudomonas monteilii</i> USDA-ARS-USMARC-56711 | Complete Genome | GCF_001534745.1 | <i>P. putida</i>      |
| <i>Pseudomonas monteilii</i> FDAARGOS 171          | Complete Genome | GCF_002943995.1 | <i>P. putida</i>      |
| <i>Pseudomonas monteilii</i> B5                    | Complete Genome | GCF_003671975.1 | <i>P. putida</i>      |
| <i>Pseudomonas monteilii</i> TCU-CK1               | Complete Genome | GCF_009831395.1 | <i>P. putida</i>      |
| <i>Pseudomonas monteilii</i> SB3078                | Complete Genome | GCF_000510285.1 | <i>P. putida</i>      |
| <i>Pseudomonas monteilii</i> SB3101                | Complete Genome | GCF_000510325.1 | <i>P. putida</i>      |
| <i>Pseudomonas moraviensis</i> LMG 24280           | Chromosome      | GCF_900105805.1 | <i>P. koreensis</i>   |
| <i>Pseudomonas moraviensis</i> R28-S               | Chromosome      | GCF_000512275.1 | <i>P. koreensis</i>   |
| <i>Pseudomonas mosselii</i> BS011                  | Complete Genome | GCF_002309555.1 | <i>P. putida</i>      |
| <i>Pseudomonas mosselii</i> PtA1                   | Complete Genome | GCF_002736065.1 | <i>P. putida</i>      |
| <i>Pseudomonas mucidolens</i> LMG 2223             | Chromosome      | GCF_900106045.1 | <i>P. gessardii</i>   |
| <i>Pseudomonas mucidolens</i> NCTC8068             | Complete Genome | GCF_900475945.1 | <i>P. gessardii</i>   |
| <i>Pseudomonas oleovorans</i>                      | Complete Genome | GCF_000953455.1 | <i>P. oleovorans</i>  |
| <i>Pseudomonas oleovorans</i> T9AD                 | Complete Genome | GCF_900626055.1 | <i>P. oleovorans</i>  |
| <i>Pseudomonas orientalis</i> F9                   | Complete Genome | GCF_002934065.1 | <i>P. fluorescens</i> |
| <i>Pseudomonas orientalis</i> L1-3-08              | Complete Genome | GCF_003851585.1 | <i>P. fluorescens</i> |
| <i>Pseudomonas orientalis</i> R2-66-08W            | Complete Genome | GCF_003851605.1 | <i>P. fluorescens</i> |
| <i>Pseudomonas orientalis</i> R4-35-08             | Complete Genome | GCF_003851645.1 | <i>P. fluorescens</i> |
| <i>Pseudomonas orientalis</i> 8B                   | Complete Genome | GCF_003852045.1 | <i>P. fluorescens</i> |

|                                                        |                 |                 |                         |
|--------------------------------------------------------|-----------------|-----------------|-------------------------|
| <i>Pseudomonas orientalis</i> LMG 23660                | Chromosome      | GCF_900105795.1 | <i>P. fluorescens</i>   |
| <i>Pseudomonas oryzae</i> KCTC 32247                   | Chromosome      | GCF_900104805.1 |                         |
| <i>Pseudomonas oryzihabitans</i> USDA-ARS-USMARC-56511 | Complete Genome | GCF_001518815.1 | <i>P. oryzihabitans</i> |
| <i>Pseudomonas oryzihabitans</i> FDAARGOS 657          | Complete Genome | GCF_008693825.1 | <i>P. oryzihabitans</i> |
| <i>Pseudomonas palleroniana</i> MAB3                   | Chromosome      | GCF_002953635.1 | <i>P. fluorescens</i>   |
| <i>Pseudomonas parafulva</i> CRS01-1                   | Complete Genome | GCF_000800255.1 | <i>P. putida</i>        |
| <i>Pseudomonas parafulva</i> PRS09-11288               | Complete Genome | GCF_002021815.1 | <i>P. putida</i>        |
| <i>Pseudomonas parafulva</i> JBCS1880                  | Complete Genome | GCF_003410295.1 | <i>P. putida</i>        |
| <i>Pseudomonas pelagia</i> Kongs-67                    | Complete Genome | GCF_009497895.1 | <i>P. pertucinogena</i> |
| <i>Pseudomonas plecoglossicida</i> NyZ12               | Complete Genome | GCF_000831585.1 | <i>P. putida</i>        |
| <i>Pseudomonas plecoglossicida</i> XSDHY-P             | Complete Genome | GCF_003391255.1 | <i>P. putida</i>        |
| <i>Pseudomonas poae</i> LMG 21465                      | Chromosome      | GCF_900103965.1 | <i>P. fluorescens</i>   |
| <i>Pseudomonas poae</i> RE1-1-14                       | Complete Genome | GCF_000336465.1 | <i>P. fluorescens</i>   |
| <i>Pseudomonas pohangensis</i> DSM 17875               | Chromosome      | GCF_900105995.1 |                         |
| <i>Pseudomonas prosekii</i> LMG 26867                  | Chromosome      | GCF_900105155.1 | <i>P. mandelii</i>      |
| <i>Pseudomonas protegens</i> UCT                       | Chromosome      | GCF_001874665.1 | <i>P. protegens</i>     |
| <i>Pseudomonas protegens</i> H78                       | Complete Genome | GCF_002006545.1 | <i>P. protegens</i>     |
| <i>Pseudomonas protegens</i> FDAARGOS 307              | Complete Genome | GCF_002208745.2 | <i>P. protegens</i>     |
| <i>Pseudomonas protegens</i> FD6                       | Complete Genome | GCF_003363755.1 | <i>P. protegens</i>     |
| <i>Pseudomonas protegens</i> pf5                       | Complete Genome | GCF_008807675.1 | <i>P. protegens</i>     |
| <i>Pseudomonas protegens</i> pf5-k3                    | Complete Genome | GCF_008807695.1 | <i>P. protegens</i>     |
| <i>Pseudomonas protegens</i> pf5-k2                    | Complete Genome | GCF_008807715.1 | <i>P. protegens</i>     |
| <i>Pseudomonas protegens</i> SN15-2                    | Complete Genome | GCF_009745915.1 | <i>P. protegens</i>     |
| <i>Pseudomonas protegens</i> Cab57                     | Complete Genome | GCF_000828695.1 | <i>P. protegens</i>     |
| <i>Pseudomonas protegens</i> CHA0                      | Complete Genome | GCF_000397205.1 | <i>P. protegens</i>     |
| <i>Pseudomonas protegens</i> Pf-5                      | Complete Genome | GCF_000012265.1 | <i>P. protegens</i>     |
| <i>Pseudomonas pseudoalcaligenes</i> CECT 5344         | Complete Genome | GCF_000297075.2 | <i>P. oleovorans</i>    |
| <i>Pseudomonas psychrophila</i> LMG 24276              | Chromosome      | GCF_900106105.1 | <i>P. fragi</i>         |
| <i>Pseudomonas psychrotolerans</i> PRS08-11306         | Complete Genome | GCF_001913135.1 | <i>P. oryzihabitans</i> |
| <i>Pseudomonas psychrotolerans</i> CS51                | Complete Genome | GCF_006384975.1 | <i>P. oryzihabitans</i> |
| <i>Pseudomonas putida</i> DLL-E4                       | Complete Genome | GCF_000691565.1 | <i>P. putida</i>        |

|                                      |                 |                 |                    |
|--------------------------------------|-----------------|-----------------|--------------------|
| <i>Pseudomonas putida</i> 1A00316    | Complete Genome | GCF_001515585.1 | <i>P. putida</i>   |
| <i>Pseudomonas putida</i> PC2        | Complete Genome | GCF_001636055.1 | <i>P. putida</i>   |
| <i>Pseudomonas putida</i> PP112420   | Complete Genome | GCF_001886975.1 | <i>P. putida</i>   |
| <i>Pseudomonas putida</i> DRA525     | Chromosome      | GCF_001908395.1 | <i>P. putida</i>   |
| <i>Pseudomonas putida</i> AA7        | Complete Genome | GCF_002025705.1 | <i>P. putida</i>   |
| <i>Pseudomonas putida</i> KF715      | Complete Genome | GCF_002356095.1 | <i>P. putida</i>   |
| <i>Pseudomonas putida</i> E46        | Complete Genome | GCF_002736045.1 | <i>P. putida</i>   |
| <i>Pseudomonas putida</i> E41        | Complete Genome | GCF_002736125.1 | <i>P. putida</i>   |
| <i>Pseudomonas putida</i> IEC33019   | Complete Genome | GCF_002741075.1 | <i>P. putida</i>   |
| <i>Pseudomonas putida</i> JBC17      | Complete Genome | GCF_003228315.1 | <i>P. jessenii</i> |
| <i>Pseudomonas putida</i> NX-1       | Complete Genome | GCF_003290365.1 | <i>P. putida</i>   |
| <i>Pseudomonas putida</i> B4         | Complete Genome | GCF_003671955.1 | <i>P. putida</i>   |
| <i>Pseudomonas putida</i> 1290       | Complete Genome | GCF_005080685.1 | <i>P. putida</i>   |
| <i>Pseudomonas putida</i> B1         | Complete Genome | GCF_007833495.1 | <i>P. putida</i>   |
| <i>Pseudomonas putida</i> JYR-1      | Complete Genome | GCF_008605605.1 | <i>P. putida</i>   |
| <i>Pseudomonas putida</i> W5         | Complete Genome | GCF_009883635.1 | <i>P. putida</i>   |
| <i>Pseudomonas putida</i> TS312      | Complete Genome | GCF_009938035.1 | <i>P. putida</i>   |
| <i>Pseudomonas putida</i> N1R        | Chromosome      | GCF_900156185.1 | <i>P. putida</i>   |
| <i>Pseudomonas putida</i> NCTC13186  | Complete Genome | GCF_900636645.1 | <i>P. putida</i>   |
| <i>Pseudomonas putida</i> B6-2       | Complete Genome | GCF_000226035.2 | <i>P. putida</i>   |
| <i>Pseudomonas putida</i> BIRD-1     | Complete Genome | GCF_000183645.1 | <i>P. putida</i>   |
| <i>Pseudomonas putida</i> DOT-T1E    | Complete Genome | GCF_000281215.1 | <i>P. putida</i>   |
| <i>Pseudomonas putida</i> F1         | Complete Genome | GCF_000016865.1 | <i>P. putida</i>   |
| <i>Pseudomonas putida</i> GB-1       | Complete Genome | GCF_000019125.1 | <i>P. putida</i>   |
| <i>Pseudomonas putida</i> H8234      | Complete Genome | GCF_000410575.1 | <i>P. putida</i>   |
| <i>Pseudomonas putida</i> HB3267 PC9 | Complete Genome | GCF_000325725.1 | <i>P. putida</i>   |
| <i>Pseudomonas putida</i> JB         | Complete Genome | GCF_001767335.1 | <i>P. putida</i>   |
| <i>Pseudomonas putida</i> KT2440     | Complete Genome | GCF_000007565.2 | <i>P. putida</i>   |

|                                                                    |                 |                 |                         |
|--------------------------------------------------------------------|-----------------|-----------------|-------------------------|
| <i>Pseudomonas putida</i> NBRC 14164                               | Complete Genome | GCF_000412675.1 | <i>P. putida</i>        |
| <i>Pseudomonas putida</i> ND6                                      | Complete Genome | GCF_000264665.2 | <i>P. putida</i>        |
| <i>Pseudomonas putida</i> S12                                      | Complete Genome | GCF_000495455.2 | <i>P. putida</i>        |
| <i>Pseudomonas putida</i> S13 1 2                                  | Complete Genome | GCF_000498395.2 | <i>P. putida</i>        |
| <i>Pseudomonas putida</i> S16                                      | Complete Genome | GCF_000219705.1 | <i>P. putida</i>        |
| <i>Pseudomonas putida</i> SJTE-1                                   | Complete Genome | GCF_000271965.2 | <i>P. putida</i>        |
| <i>Pseudomonas putida</i> W619                                     | Complete Genome | GCF_000019445.1 | <i>P. putida</i>        |
| <i>Pseudomonas reinekei</i> DSM 18361                              | Chromosome      | GCF_900104125.1 | <i>P. jessenii</i>      |
| <i>Pseudomonas resinovorans</i> NBRC 106553                        | Complete Genome | GCF_000412695.1 | <i>P. resinovorans</i>  |
| <i>Pseudomonas rhizosphaerae</i> DSM 16299                         | Complete Genome | GCF_000761155.1 |                         |
| <i>Pseudomonas rhodesiae</i> LMG 17764                             | Chromosome      | GCF_900105575.1 | <i>P. fluorescens</i>   |
| <i>Pseudomonas sabulinigri</i> JCM 14963                           | Chromosome      | GCF_900105255.1 | <i>P. pertucinogena</i> |
| <i>Pseudomonas salegens</i> CECT 8338                              | Chromosome      | GCF_900105655.1 | <i>P. pertucinogena</i> |
| <i>Pseudomonas saudiphocaensis</i> 20 BN                           | Chromosome      | GCF_000756775.1 | <i>P. stutzeri</i>      |
| <i>Pseudomonas savastanoi</i> pv <i>phaseolicola</i> 1448A BAA-978 | Complete Genome | GCF_000012205.1 | <i>P. syringae</i>      |
| <i>Pseudomonas savastanoi</i> pv <i>savastanoi</i> NCPPB 3335      | Complete Genome | GCF_000164015.3 | <i>P. syringae</i>      |
| <i>Pseudomonas sihuiensis</i> KCTC 32246                           | Chromosome      | GCF_900106015.1 | <i>P. oleovorans</i>    |
| <i>Pseudomonas silesiensis</i> A3                                  | Complete Genome | GCF_001661075.1 | <i>P. mandelii</i>      |
| <i>Pseudomonas simiae</i> WCS417                                   | Chromosome      | GCF_000698265.1 | <i>P. fluorescens</i>   |
| <i>Pseudomonas simiae</i> PCL1751                                  | Complete Genome | GCF_000934565.1 | <i>P. fluorescens</i>   |
| <i>Pseudomonas simiae</i> PICF7                                    | Complete Genome | GCF_000963495.1 | <i>P. fluorescens</i>   |
| <i>Pseudomonas soli</i> SJ10                                       | Complete Genome | GCF_000498975.2 | <i>P. putida</i>        |
| <i>Pseudomonas stutzeri</i> CGMCC 1 1803                           | Complete Genome | GCF_000219605.1 | <i>P. stutzeri</i>      |
| <i>Pseudomonas stutzeri</i> 28a24                                  | Complete Genome | GCF_000590475.1 | <i>P. stutzeri</i>      |
| <i>Pseudomonas stutzeri</i> 19SMN4                                 | Complete Genome | GCF_000661915.1 | <i>P. stutzeri</i>      |
| <i>Pseudomonas stutzeri</i> SLG510A3-8                             | Complete Genome | GCF_001038645.1 | <i>P. stutzeri</i>      |
| <i>Pseudomonas stutzeri</i> 273                                    | Complete Genome | GCF_001648195.1 | <i>P. stutzeri</i>      |
| <i>Pseudomonas stutzeri</i> DW2-1                                  | Complete Genome | GCF_003001655.1 | <i>P. stutzeri</i>      |
| <i>Pseudomonas stutzeri</i> 1W1-1A                                 | Complete Genome | GCF_003008495.1 | <i>P. stutzeri</i>      |
| <i>Pseudomonas stutzeri</i> SGAir0442                              | Complete Genome | GCF_003047145.2 | <i>P. stutzeri</i>      |

|                                                        |                 |                 |                       |
|--------------------------------------------------------|-----------------|-----------------|-----------------------|
| <i>Pseudomonas stutzeri</i> PheN2                      | Complete Genome | GCF_005844005.1 | <i>P. stutzeri</i>    |
| <i>Pseudomonas stutzeri</i> XL272                      | Complete Genome | GCF_009740185.1 | <i>P. stutzeri</i>    |
| <i>Pseudomonas stutzeri</i> PM101005                   | Complete Genome | GCF_009789555.1 | <i>P. stutzeri</i>    |
| <i>Pseudomonas stutzeri</i> NCTC10450                  | Complete Genome | GCF_900636845.1 | <i>P. stutzeri</i>    |
| <i>Pseudomonas stutzeri</i> NCTC10475                  | Complete Genome | GCF_900638035.1 | <i>P. stutzeri</i>    |
| <i>Pseudomonas stutzeri</i> A1501                      | Complete Genome | GCF_000013785.1 | <i>P. stutzeri</i>    |
| <i>Pseudomonas stutzeri</i> CCUG 29243                 | Complete Genome | GCF_000267545.1 | <i>P. stutzeri</i>    |
| <i>Pseudomonas stutzeri</i> DSM 10701                  | Complete Genome | GCF_000279165.1 | <i>P. stutzeri</i>    |
| <i>Pseudomonas stutzeri</i> DSM 4166                   | Complete Genome | GCF_000195105.1 | <i>P. stutzeri</i>    |
| <i>Pseudomonas stutzeri</i> RCH2                       | Complete Genome | GCF_000327065.1 | <i>P. stutzeri</i>    |
| <i>Pseudomonas synxantha</i> LBUM223                   | Complete Genome | GCF_000968415.2 | <i>P. fluorescens</i> |
| <i>Pseudomonas synxantha</i> KENGFT3                   | Chromosome      | GCF_001602175.1 | <i>P. fluorescens</i> |
| <i>Pseudomonas synxantha</i> 30B                       | Complete Genome | GCF_003851465.1 | <i>P. fluorescens</i> |
| <i>Pseudomonas synxantha</i> 28887                     | Complete Genome | GCF_003851495.1 | <i>P. fluorescens</i> |
| <i>Pseudomonas synxantha</i> R2-4-08W                  | Complete Genome | GCF_003851525.1 | <i>P. fluorescens</i> |
| <i>Pseudomonas synxantha</i> R6-28-08                  | Complete Genome | GCF_003851555.1 | <i>P. fluorescens</i> |
| <i>Pseudomonas synxantha</i> R2-54-08W                 | Complete Genome | GCF_003852025.1 | <i>P. fluorescens</i> |
| <i>Pseudomonas synxantha</i> LMG 2190                  | Chromosome      | GCF_900105675.1 | <i>P. fluorescens</i> |
| <i>Pseudomonas synxantha</i> NCTC10696                 | Complete Genome | GCF_901482615.1 | <i>P. fluorescens</i> |
| <i>Pseudomonas synxantha</i> BG33R                     | Chromosome      | GCF_000263715.2 | <i>P. fluorescens</i> |
| <i>Pseudomonas syringae</i> inb918                     | Complete Genome | GCF_004006335.1 |                       |
| <i>Pseudomonas syringae</i> Ps25                       | Chromosome      | GCF_004323795.1 | <i>P. syringae</i>    |
| <i>Pseudomonas syringae</i> 31R1                       | Chromosome      | GCF_900105295.1 | <i>P. syringae</i>    |
| <i>Pseudomonas syringae</i> CFBP3840                   | Complete Genome | GCF_900235815.1 | <i>P. syringae</i>    |
| <i>Pseudomonas syringae</i> CC1557                     | Complete Genome | GCF_000452705.1 | <i>P. syringae</i>    |
| <i>Pseudomonas syringae</i> group genomosp 3 CFBP6411  | Complete Genome | GCF_900235905.1 | <i>P. syringae</i>    |
| <i>Pseudomonas syringae</i> pv actinidiae ICMP 20586   | Complete Genome | GCF_001913215.1 | <i>P. syringae</i>    |
| <i>Pseudomonas syringae</i> pv actinidiae NZ-47        | Complete Genome | GCF_001913235.1 | <i>P. syringae</i>    |
| <i>Pseudomonas syringae</i> pv actinidiae CRAFRU 12 29 | Complete Genome | GCF_002024285.1 | <i>P. syringae</i>    |
| <i>Pseudomonas syringae</i> pv actinidiae CRAFRU 14 08 | Complete Genome | GCF_002024305.1 | <i>P. syringae</i>    |

|                                                                   |                 |                 |                    |
|-------------------------------------------------------------------|-----------------|-----------------|--------------------|
| <i>Pseudomonas syringae</i> pv <i>actinidiae</i> MAFF212063       | Complete Genome | GCF_002763655.1 | <i>P. syringae</i> |
| <i>Pseudomonas syringae</i> pv <i>actinidiae</i> P155             | Complete Genome | GCF_003665415.1 | <i>P. syringae</i> |
| <i>Pseudomonas syringae</i> pv <i>actinidiae</i> ICMP 18708       | Complete Genome | GCF_000344355.2 | <i>P. syringae</i> |
| <i>Pseudomonas syringae</i> pv <i>actinidiae</i> ICMP 18884       | Complete Genome | GCF_000648735.3 | <i>P. syringae</i> |
| <i>Pseudomonas syringae</i> pv <i>actinidiae</i> ICMP 9617        | Chromosome      | GCF_000658965.1 | <i>P. syringae</i> |
| <i>Pseudomonas syringae</i> pv <i>actinidiae</i> ICMP 9853        | Complete Genome | GCF_000344335.2 | <i>P. syringae</i> |
| <i>Pseudomonas syringae</i> pv <i>actinidiae</i> str Shaanxi M228 | Complete Genome | GCF_000344475.3 | <i>P. syringae</i> |
| <i>Pseudomonas syringae</i> pv <i>atrofaciens</i> LMG5095         | Complete Genome | GCF_003047185.1 | <i>P. syringae</i> |
| <i>Pseudomonas syringae</i> pv <i>avii</i> CFBP3846               | Complete Genome | GCF_900235835.1 | <i>P. syringae</i> |
| <i>Pseudomonas syringae</i> pv <i>cerasicola</i> CFBP6109         | Complete Genome | GCF_900235885.1 | <i>P. syringae</i> |
| <i>Pseudomonas syringae</i> pv <i>lapsa</i> ATCC 10859            | Complete Genome | GCF_001482725.1 | <i>P. syringae</i> |
| <i>Pseudomonas syringae</i> pv <i>maculicola</i> str ES4326       | Complete Genome | GCF_000145845.2 | <i>P. syringae</i> |
| <i>Pseudomonas syringae</i> pv <i>pisi</i> str PP1                | Complete Genome | GCF_000452445.2 | <i>P. syringae</i> |
| <i>Pseudomonas syringae</i> pv <i>syringae</i> Pss9097            | Complete Genome | GCF_002905815.2 | <i>P. syringae</i> |
| <i>Pseudomonas syringae</i> pv <i>syringae</i> CFBP4215           | Complete Genome | GCF_900235825.1 | <i>P. syringae</i> |
| <i>Pseudomonas syringae</i> pv <i>syringae</i> CFBP2118           | Complete Genome | GCF_900235865.1 | <i>P. syringae</i> |
| <i>Pseudomonas syringae</i> pv <i>syringae</i> B301D              | Complete Genome | GCF_000988485.1 | <i>P. syringae</i> |
| <i>Pseudomonas syringae</i> pv <i>syringae</i> B64                | Chromosome      | GCF_000331385.1 | <i>P. syringae</i> |
| <i>Pseudomonas syringae</i> pv <i>syringae</i> B728a              | Complete Genome | GCF_000012245.1 | <i>P. syringae</i> |
| <i>Pseudomonas syringae</i> pv <i>syringae</i> HS191              | Complete Genome | GCF_000988395.1 | <i>P. syringae</i> |
| <i>Pseudomonas syringae</i> pv <i>syringae</i> SM                 | Chromosome      | GCF_000412165.1 | <i>P. syringae</i> |
| <i>Pseudomonas syringae</i> pv <i>tomato</i> B13-200              | Complete Genome | GCF_002966555.1 | <i>P. syringae</i> |
| <i>Pseudomonas syringae</i> pv <i>tomato</i> delta VI             | Chromosome      | GCF_009800185.1 | <i>P. syringae</i> |
| <i>Pseudomonas syringae</i> pv <i>tomato</i> delta IV,IX          | Chromosome      | GCF_009800205.1 | <i>P. syringae</i> |
| <i>Pseudomonas syringae</i> pv <i>tomato</i> delta X              | Complete Genome | GCF_009800225.1 | <i>P. syringae</i> |
| <i>Pseudomonas syringae</i> pv <i>tomato</i> DC3000               | Complete Genome | GCF_000007805.1 | <i>P. syringae</i> |
| <i>Pseudomonas syringae</i> UB303                                 | Complete Genome | GCF_000452565.2 | <i>P. syringae</i> |
| <i>Pseudomonas syringae</i> UMAF0158                              | Complete Genome | GCF_001281365.1 | <i>P. syringae</i> |
| <i>Pseudomonas syringae</i> USA011                                | Complete Genome | GCF_000452525.3 | <i>P. syringae</i> |
| <i>Pseudomonas taetrolens</i> NCTC10697                           | Complete Genome | GCF_900475285.1 | <i>P. fragi</i>    |

|                                               |                 |                 |                         |
|-----------------------------------------------|-----------------|-----------------|-------------------------|
| <i>Pseudomonas taetrolens</i> NCTC8067        | Complete Genome | GCF_900637735.1 | <i>P. fragi</i>         |
| <i>Pseudomonas thivervalensis</i> DSM 13194   | Chromosome      | GCF_900102295.1 | <i>P. corrugata</i>     |
| <i>Pseudomonas tolaasii</i> 2192T             | Chromosome      | GCF_002072675.1 | <i>P. fluorescens</i>   |
| <i>Pseudomonas trivialis</i> IHBB745          | Complete Genome | GCF_001186335.1 | <i>P. fluorescens</i>   |
| <i>Pseudomonas trivialis</i> LMG 21464        | Chromosome      | GCF_900104885.1 | <i>P. fluorescens</i>   |
| <i>Pseudomonas umsongensis</i> GO16           | Chromosome      | GCF_008824165.1 | <i>P. jessenii</i>      |
| <i>Pseudomonas umsongensis</i> LMG 21317      | Chromosome      | GCF_900105285.1 | <i>P. jessenii</i>      |
| <i>Pseudomonas vancouverensis</i> LMG 20222   | Chromosome      | GCF_900105825.1 | <i>P. jessenii</i>      |
| <i>Pseudomonas veronii</i> R02                | Complete Genome | GCF_002028325.1 | <i>P. fluorescens</i>   |
| <i>Pseudomonas veronii</i> Pvy                | Complete Genome | GCF_004919535.2 | <i>P. fluorescens</i>   |
| <i>Pseudomonas versuta</i> L10 10             | Complete Genome | GCF_001294575.1 | <i>P. fragi</i>         |
| <i>Pseudomonas viridiflava</i> CFBP 1590      | Complete Genome | GCF_900184295.1 | <i>P. syringae</i>      |
| <i>Pseudomonas xanthomarina</i> LMG 23572     | Chromosome      | GCF_900108535.1 | <i>P. stutzeri</i>      |
| <i>Pseudomonas xinjiangensis</i> NRRL B-51270 | Chromosome      | GCF_900104945.1 | <i>P. pertucinogena</i> |
| <i>Pseudomonas yamanorum</i> LBUM636          | Complete Genome | GCF_001612705.2 | <i>P. yamanorum</i>     |
| <i>Pseudomonas yamanorum</i> LMG 27247        | Chromosome      | GCF_900105735.1 | <i>P. yamanorum</i>     |
