# Supplementary material for: In Silico Characterization and Phylogenetic Distribution of Extracellular Matrix Components in the Model Rhizobacteria Pseudomonas fluorescens F113 and Other Pseudomonads
Source: MDPI journal article supplement (doi:10.3390/microorganisms8111740), 2020-11-06
Supplement: s1 [file s1]

Supplementary Table 4. Predicted localization, domains, and function of *Pseudomonas* acidic polysaccharide (Pap) biosynthetic proteins in *Pseudomonas fluorescens* F113.

| Locus<br>(PSF113_ ) | Protein | Length | Predicted cellular localization |             |              | Predicted transmembrane domains (HMMER and TMHMM2) |          | Predicted domains                                                |          |               | Predicted function                                                      |
|---------------------|---------|--------|---------------------------------|-------------|--------------|----------------------------------------------------|----------|------------------------------------------------------------------|----------|---------------|-------------------------------------------------------------------------|
|                     |         |        | Localization                    | CELLO Score | Psortb Score | Number                                             | Position | Domain                                                           | Position | SMART e-value |                                                                         |
| 1970                | PapA    | 454    | Cytoplasmic                     | 4,34        | 9,97         | 0                                                  | -        | UDP-glucose/GDP-mannose dehydrogenase family, NAD binding domain | 1-188    | 6,4E-61       | UDP-glucose 6-dehydrogenase                                             |
|                     |         |        |                                 |             |              |                                                    |          | UDP-glucose/GDP-mannose dehydrogenase family, central domain     | 205-298  | 4,8E-40       |                                                                         |
|                     |         |        |                                 |             |              |                                                    |          | UDP-glucose/GDP-mannose dehydrogenase family, UDP binding domain | 321-425  | 3,28E-47      |                                                                         |
| 1969                | PapB    | 352    | Cytoplasmic                     | 4,719       | 9,97         | 0                                                  | -        | NAD dependent epimerase/dehydratase family                       | 3-263    | 1,8E-56       | NAD-dependent epimerase/dehydratase                                     |
|                     |         |        |                                 |             |              |                                                    |          | GDP-mannose 4,6 dehydratase                                      | 4-326    | 9,7E-54       |                                                                         |
|                     |         |        |                                 |             |              |                                                    |          | RmlD substrate binding domain                                    | 1-246    | 1,5E-19       |                                                                         |
|                     |         |        |                                 |             |              |                                                    |          | 3-beta hydroxysteroid dehydrogenase/isomerase family             | 4-288    | 2,9E-18       |                                                                         |
|                     |         |        |                                 |             |              |                                                    |          | Polysaccharide biosynthesis protein                              | 3-183    | 6,1E-12       |                                                                         |
|                     |         |        |                                 |             |              |                                                    |          | NAD binding domain                                               | 41-229   | 0,000001      |                                                                         |
| 1968                | PapC    | 248    | Inner membrane                  | 2,381       | 10           | 1                                                  | 56-80    | Bacterial sugar transferase                                      | 54-243   | 2,3E-61       | Undecaprenyl-phosphate galactose phosphotransferase/Glycosyltransferase |

|      |      |     |                               |       |      |    |                                                                                             |                                               |         |             |                                                                  |
|------|------|-----|-------------------------------|-------|------|----|---------------------------------------------------------------------------------------------|-----------------------------------------------|---------|-------------|------------------------------------------------------------------|
| 1967 | PapD | 214 | Outer membrane/inner membrane | 1,864 | 9,97 | 0  | -                                                                                           | Cellulose biosynthesis protein BcsQ           | 27-192  | 7,1E-09     | Protein EpsD / CpsD/CapB family tyrosine-kinase protein          |
| 1966 | PapE | 340 | Outer membrane                | 2,08  | -    | 0  | -                                                                                           | Polysaccharide biosynthesis/export protein    | 63-144  | 5,7E-13     | Putative polysaccharide biosynthesis/export family protein       |
|      |      |     |                               |       |      |    |                                                                                             | Polysaccharide biosynthesis/export protein    | 135-216 | 9,4E-09     |                                                                  |
|      |      |     |                               |       |      |    |                                                                                             | SLBB domain                                   | 223-273 | 9,1E-10     |                                                                  |
| 1965 | PapF | 530 | Inner membrane                | 2,65  | 9,82 | 2  | 21-40, 460-479                                                                              | Chain length determinant protein (Wzz) domain | 7-101   | 0,000000014 | Lipopolysaccharide biosynthesis protein/Chain length determinant |
| 1964 | PapG | 367 | Cytoplasmic                   | 2,736 | 9,26 | 0  | -                                                                                           | Glycosyl transferases group 1                 | 177-340 | 7,1E-35     | Group 4 glycosyl transferase                                     |
|      |      |     |                               |       |      |    |                                                                                             | Glycosyl transferases group 1                 | 186-326 | 2,1E-30     |                                                                  |
|      |      |     |                               |       |      |    |                                                                                             | Glycosyltransferase Family 4                  | 27-173  | 1,6E-13     |                                                                  |
|      |      |     |                               |       |      |    |                                                                                             | Glycosyl transferase 4-like domain            | 33-170  | 3,8E-127    |                                                                  |
|      |      |     |                               |       |      |    |                                                                                             | Glycosyl transferases group 1                 | 263-357 | 0,00000001  |                                                                  |
| 1963 | PapH | 456 | Inner membrane                | 4,932 | 10   | 11 | 7-41, 64-86, 98-116, 126-143, 150-172, 187-204, 209-227, 233-249, 261-283, 369-391, 404-426 | O-Antigen ligase (Wzy-C)                      | 217-378 | 3,3E-16     | Hypothetical protein/Polymerase/O-Antigen ligase family protein  |
| 1962 | PapI | 319 | Inner membrane/Cytoplasmic    | 2,837 | 8,96 | 1  | 254-276                                                                                     | Glycosyl transferase family 2                 | 5-162   | 1,1E-21     | Group 2 glycosyl transferase family protein                      |
|      |      |     |                               |       |      |    |                                                                                             | Glycosyltransferase like family 2             | 2-216   | 1,1E-12     |                                                                  |
|      |      |     |                               |       |      |    |                                                                                             | Glycosyl transferase family group 2           | 82-305  | 0,000000001 |                                                                  |

|      |      |     |                   |       |      |   |                                                                                                         |                                                   |         |                 |                                                                                                          |
|------|------|-----|-------------------|-------|------|---|---------------------------------------------------------------------------------------------------------|---------------------------------------------------|---------|-----------------|----------------------------------------------------------------------------------------------------------|
|      |      |     |                   |       |      |   |                                                                                                         | Glycosyl transferase family 21                    | 69-214  | 0,000001<br>1   |                                                                                                          |
| 1961 | PapJ | 378 | Inner<br>membrane | 4,283 | 10   | 4 | 14-33,<br>288-307,<br>313-333,<br>345-364                                                               | Glycosyl transferase family 2                     | 45-193  | 1,5E-26         | Group 2 glycosyl<br>transferase family protein                                                           |
|      |      |     |                   |       |      |   |                                                                                                         | Glycosyltransferase like family<br>2              | 41-259  | 2,5E-19         |                                                                                                          |
|      |      |     |                   |       |      |   |                                                                                                         | Glycosyltransferase like family<br>2              | 43-146  | 6,4E-11         |                                                                                                          |
|      |      |     |                   |       |      |   |                                                                                                         | Glycosyl transferase family<br>group 2            | 124-358 | 0,000000<br>026 |                                                                                                          |
|      |      |     |                   |       |      |   |                                                                                                         | Glycosyl transferase family 21                    | 96-257  | 0,000000<br>62  |                                                                                                          |
| 1960 | PapK | 334 | Cytoplasmic       | 4,179 | 9,97 | 0 | -                                                                                                       | Polysaccharide deacetylase                        | 85-291  | 2,7E-25         | Polysaccharide deacetylase                                                                               |
| 1959 | PapL | 434 | Inner<br>membrane | 4,569 | 10   | 9 | 113-135,<br>147-169,<br>174-196,<br>236-258,<br>260-277,<br>296-318,<br>325-344,<br>354-376,<br>381-403 | Polysaccharide biosynthesis<br>protein            | 30-326  | 3E-21           | Polysaccharide<br>biosynthesis protein<br>membrane<br>protein/Oligosaccharide<br>flippase family protein |
|      |      |     |                   |       |      |   |                                                                                                         | Polysaccharide biosynthesis<br>protein            | 7-277   | 3,6E-17         |                                                                                                          |
|      |      |     |                   |       |      |   |                                                                                                         | Polysaccharide biosynthesis C-<br>terminal domain | 327-420 | 1,1E-12         |                                                                                                          |
| 1958 | PapM | 658 | Periplasmic       | 3,295 | -    | 1 | 7-25                                                                                                    | -                                                 | -       | -               | Hypothetical protein                                                                                     |
| 1957 | PapN | 229 | Cytoplasmic       | 2,977 | 8,96 | 0 | -                                                                                                       | -                                                 | -       | -               | Hypothetical protein                                                                                     |
| 1956 | PapO | 391 | Cytoplasmic       | 2,184 | 8,96 | 0 | -                                                                                                       | Acetyltransferase (GNAT)<br>domain                | 171-315 | 9,4E-22         | Cellulose biosynthesis<br>protein/GNAT family N-<br>acetyltransferase                                    |
| 1955 | PapP | 260 | Cytoplasmic       | 2,553 | 8,96 | 0 | -                                                                                                       | YdjC-like protein                                 | 1-233   | 3,5E-43         | Cellobiose<br>phosphotransferase system<br>YdjC-like protein                                             |
