# Supplementary material for: In Silico Characterization and Phylogenetic Distribution of Extracellular Matrix Components in the Model Rhizobacteria Pseudomonas fluorescens F113 and Other Pseudomonads
Source: Microorganisms. 2020 Nov 6;8(11):1740. doi: 10.3390/microorganisms8111740 (PMC7716237; doi:10.3390/microorganisms8111740)
Supplement: Supplementary file 1 [file microorganisms-08-01740-s001.zip]

Archive with 8 entries (8 files):
- Supplementary_Figure_1.pdf
- Supplementary_Figure_2.pdf
- Supplementary_Table_1.pdf
- Supplementary_Table_2.pdf
- Supplementary_Table_3.xlsx
- Supplementary_Table_4.pdf
- Supplementary_Table_5.xlsx
- Supplementary_Table_6.pdf
