# Supplementary material for: In Silico Characterization and Phylogenetic Distribution of Extracellular Matrix Components in the Model Rhizobacteria Pseudomonas fluorescens F113 and Other Pseudomonads
Source: Microorganisms. 2020 Nov 6;8(11):1740. doi: 10.3390/microorganisms8111740 (PMC7716237; doi:10.3390/microorganisms8111740)
Supplement: Supplementary file 1 [file microorganisms-08-01740-s001.zip › Supplementary_Table_3.xlsx]

## Sheet: Hoja1
Supplementary Table 3. Nucleotide and amino acid sequences comparison of Pseudomonas fluorescens F113 gene clusters inside the genus Pseudomonas							Subject (P. fluorescens F113)
Alginate- alg cluster
Query: P. corrugata CFBP 5454
Blastp
Protein	P. corrugata protein lenght	P. fluorescens F113 protein lenght	Query Seq Identifer	Locus Tag (Subject)	Subject Product Name	Alignment Length	% Identity	E-value
AlgD	438	438	K659_RS0107190	PSF113_4752	GDP-mannose 6-dehydrogenase	438	97.945	0
Alg8	496	493	K659_RS0107185	PSF113_4753	Protein Alg8	493	98.377	0
Alg44	389	389	K659_RS0107180	PSF113_4754	Protein Alg44	388	94.845	0
AlgK	500	494	K659_RS0107175	PSF113_4755	Protein AlgK	500	92.000	0
AlgE	494	499	K659_RS0107170	PSF113_4756	Protein AlgE	496	93.952	0
AlgG	529	529	K659_RS0107165	PSF113_4757	Poly(beta-D-mannuronate) C5 epimerase precursor	529	94.140	0
AlgX	482	483	K659_RS0107160	PSF113_4758	Protein AlgX	483	94.617	0
AlgL	374	378	K659_RS0107155	PSF113_4759	Alginate lyase precursor	374	92.513	0
AlgI	521	521	K659_RS0107150	PSF113_4760	Putative poly(beta-D-mannuronate) O-acetylase	521	96.161	0
AlgJ	391	391	K659_RS0107145	PSF113_4761	Protein AlgJ	391	95.652	0
AlgF	221	221	K659_RS0107140	PSF113_4762	Protein AlgF	221	94.570	0
AlgA	483	483	K659_RS0107135	PSF113_4763	Mannose-6-phosphate isomerase / Mannose-1-phosphate guanylyltransferase (GDP)	483	97.308	0
Blastn
Gene	P. corrugata gene lenght	P. fluorescens F113 gene lenght	Alignment Length	% Identity	E-value
algD	1317	1317	1317	93.774	0
alg8	1491	1482	1491	94.098	0
alg44	1170	1170	1165	90.987	0
algK	1503	1485	1392	90.805	0
algE	1485	1500	1491	91.281	0
algG	1590	1590	1591	92.772	0
algX	1449	1452	1452	91.460	0
algL	1125	1137	1127	90.506	0
algI	1566	1566	1566	92.976	0
algJ	1176	1176	1176	91.412	0
algF	666	666	666	91.141	0
algA	1452	1452	1452	93.457	0
Query: P. aeruginosa PAO1
Blastp
Protein	P. aeruginosa protein lenght	P. fluorescens F113 protein lenght	Query Seq Identifer	Locus Tag (Subject)	Subject Product Name	Alignment Length	% Identity	E-value
AlgD	436	438	K659_RS0107190	PSF113_4752	GDP-mannose 6-dehydrogenase	438	76941	0
Alg8	494	493	K659_RS0107185	PSF113_4753	Protein Alg8	493	83367	0
Alg44	389	389	K659_RS0107180	PSF113_4754	Protein Alg44	387	56589	0
AlgK	475	494	K659_RS0107175	PSF113_4755	Protein AlgK	454	59471	0
AlgE	490	499	K659_RS0107170	PSF113_4756	Protein AlgE	508	59252	0
AlgG	543	529	K659_RS0107165	PSF113_4757	Poly(beta-D-mannuronate) C5 epimerase precursor	523	66730	0
AlgX	474	483	K659_RS0107160	PSF113_4758	Protein AlgX	478	50837	0
AlgL	367	378	K659_RS0107155	PSF113_4759	Alginate lyase precursor	370	63514	0
AlgI	520	521	K659_RS0107150	PSF113_4760	Putative poly(beta-D-mannuronate) O-acetylase	526	76996	0
AlgJ	391	391	K659_RS0107145	PSF113_4761	Protein AlgJ	386	53627	0
AlgF	216	221	K659_RS0107140	PSF113_4762	Protein AlgF	215	60930	0
AlgA	481	483	K659_RS0107135	PSF113_4763	Mannose-6-phosphate isomerase / Mannose-1-phosphate guanylyltransferase (GDP)	470	43724	0
Blastn
Gene	P. aeruginosa gene lenght	P. fluorescens F113 gene lenght	Alignment Length	% Identity	E-value
algD	1311	1317	1317	78658	0
alg8	1485	1482	1491	83029	0
alg44	1170	1170	1165	72070	0
algK	1428	1485	1392	72265	0
algE	1473	1500	1491	73289	0
algG	1632	1590	1591	75655	0
algX	1425	1452	1452	75161	0
algL	1104	1137	1127	76164	0
algI	1563	1566	1566	84985	0
algJ	1176	1176	1176	71120	0
algF	651	666	666	75271	0
algA	1446	1452	1452	81844	0
Functional amyloids in Pseudomonas - fap cluster
Query: P. aeruginosa PAO1
Blastp
Protein	P. aeruginosa protein lenght	P. fluorescens F113 protein lenght	Query Seq Identifer	Locus Tag (Subject)	Subject Product Name	Alignment Length	% Identity	E-value
FapF	421	412	PA1951	PSF113_2680	Hypothetical protein	408	66.176	0
FapE	250	248	PA1952	PSF113_2681	Hypothetical protein	252	45.238	0
FapD	226	226	PA1953	PSF113_2682	Peptidase bacteriocin processing	226	69.027	0
FapC	340	324	PA1954	PSF113_2683	Large exoproteins involved in heme utilization or adhesion	341	41.642	0
FapB	189	197	PA1955	PSF113_2684	Autotransporter adhesin	165	48.485	4.21001e-40
FapA	162	148	PA1956	PSF113_2685	Hypothetical protein	162	38.889	1.47e-12
Blastn
Gene	P. fluorescens UK4 gene lenght	P. fluorescens F113 gene lenght	Alignment Length	% Identity	E-value
fapF	1266	1239	941	76.196	0
fapF			107	80.374	1.36e-15
fapE	753	747	99	76.768	4.84e-08
fapE			84	78.571	2.25e-06
fapE			62	80.645	2.91e-05
fapD	681	681	614	74.919	0
fapC	1023	975	267	73.783	3.9e-20
fapC			44	90.909	5.12e-09
fapB	570	594	88	77.273	1.69e-06
fapA	489	447	No hits
Query: P. fluorescens UK4
Blastp
Protein	P. aeruginosa protein lenght	P. fluorescens F113 protein lenght	Query Seq Identifer	Locus Tag (Subject)	Subject Product Name	Alignment Length	% Identity	E-value
FapF	430	412	HZ99_RS03975	PSF113_2680	Hypothetical protein	415	79.759	0
FapE	254	248	HZ99_RS03970	PSF113_2681	Hypothetical protein	248	58.871	0
FapD	246	226	HZ99_RS03965	PSF113_2682	Peptidase bacteriocin processing	226	73.009	0
FapC	250	324	HZ99_RS03960	PSF113_2683	Large exoproteins involved in heme utilization or adhesion	193	47.668	1.35e-29
FapC		197	HZ99_RS03960	PSF113_2683	Large exoproteins involved in heme utilization or adhesion	141	41.844	1.88e-14
FapC		148	HZ99_RS03960	PSF113_2683	Large exoproteins involved in heme utilization or adhesion	219	32.420	7.36e-14
FapB	182		HZ99_RS03955	PSF113_2684	Autotransporter adhesin	178	60.112	0
FapA	152		HZ99_RS03950	PSF113_2685	Hypothetical protein	143	46.154	4.81e-25
Blastn
Gene	P. fluorescens UK4 gene lenght	P. fluorescens F113 gene lenght	Alignment Length	% Identity	E-value
fapF	1293	1239	1269	77.463	0
fapE	765		97	85.567	2.24e-21
fapE		747	224	72.321	8.17e-11
fapD	741		540	79.630	0
fapC	753		105	81.905	6.17e-17
fapC		681	74	85.135	3.71e-14
fapB	549	975	280	80.000	0
fapA	459		39	89.744	1.35e-06
fapA		594
fapA		447
LapA- lap cluster
Query: Pseudomonas sp. WCS365
Blastp
Protein	Pseudomonas sp. WCS365 protein lenght	P. fluorescens F113 protein lenght	Query Seq Identifer	Locus Tag (Subject)	Subject Product Name	Alignment Length	% Identity	E-value
LapG	220	220	CVG87_RS29790	PSF113_0205	Protein Btlcp	220	99.545	0
LapD	648	648	CVG87_RS29795	PSF113_0206	Protein LapD	648	98.611	0
PSF113_0207	112	112	CVG87_RS29815	PSF113_0207	Tryptophan synthase subunit beta like protein	112	99.107	0
LapA	1303	5414	CVG87_RS29820	PSF113_0208	Protein LapA	1301	92.314	0
LapE	449	449	CVG87_RS29010	PSF113_0209	Channel protein TolC	449	98.886	0
LapB	718	718	CVG87_RS29015	PSF113_0210	Type I secretion system ATPase	718	97.911	0
LapC	445	445	CVG87_RS29020	PSF113_0211	Type I secretion membrane fusion family, HlyD family secretion protein	445	98.427	0
Blastn
Gene	Pseudomonas sp. WCS365 gene lenght	P. fluorescens F113 gene lenght	Alignment Length	% Identity	E-value
lapG	663	663	663	99.095	0
lapD	1947	1947	1947	95.172	0
PSF113_0207	339	339	339	98.82	0
lapA	3914	16245	3735	93.601	0
lapE	1350	1350	1350	95.852	0
lapB	2157	2157	2157	94.298	0
lapC	1338	1338	1338	95.291	0
MapA- map cluster
Query: P. fluorescens Pf0-1
Blastp
Protein	P. fluorescens Pf0-1 protein lenght	P. fluorescens F113 protein lenght	Query Seq Identifer	Locus Tag (Subject)	Subject Product Name	Alignment Length	% Identity	E-value
MapB	453	454	Pfl01_1460	PSF113_1508	Type I secretion membrane fusion protein, HlyD	447	91.499	0
MapC	719	719	Pfl01_1461	PSF113_1509	ABC transporter transmembrane protein	719	92.072	0
MapE	452	452	Pfl01_1462	PSF113_1510	Type I secretion outer membrane protein, TolC	452	88.496	0
MapA	2887	2364	Pfl01_1463	PSF113_1511	Putative hemagglutinin/hemolysin-like protein	2225	69.798	0
Blastn
Gene	P. fluorescens Pf0-1 gene lenght	P. fluorescens F113 gene lenght	Alignment Length	% Identity	E-value
mapB	1362	1365	1331	87.378	0
mapC	2160	2160	2162	86.54	0
mapE	1359	1359	1364	84.971	0
mapA	8675	7095	0.99	77.74	0
PsmE- psm cluster
Query: P. syringae pv. tomato DC3000
Blastp
Protein	P. syringae pv. tomato DC3000 protein lenght	P. fluorescens F113 protein lenght	Query Seq Identifer	Locus Tag (Subject)	Subject Product Name	Alignment Length	% Identity	E-value
PsmE	1610	1870	PSPTO_4084	PSF113_3004	Mannuronan C-5 epimerase	1077	63.417	0
PSF113_3005	456	449	PSPTO_3328	PSF113_3005	TolC family type I secretion outer membrane protein	455	29.67	0
PSF113_3006	418	456	PSPTO_3329	PSF113_3006	ABC transporter substrate-binding protein	414	36.232	0
PSF113_3007	599	573	PSPTO_3330	PSF113_3007	ABC transporter ATP-binding protein	544	51.838	0
Blastn
Gene	P. syringae pv. tomato DC3000 gene lenght	P. fluorescens F113 gene lenght	Alignment Length	% Identity	E-value
psmE	4833	5613	2253	75.055	0
PSF113_3005	1371	1350	455	29.67	0
PSF113_3006	1254	1371	131	78.626	3.91e-16
PSF113_3007	1800	1722	482	70.539	1.06e-17
