# Supplementary material for: In Silico Characterization and Phylogenetic Distribution of Extracellular Matrix Components in the Model Rhizobacteria Pseudomonas fluorescens F113 and Other Pseudomonads
Source: Microorganisms. 2020 Nov 6;8(11):1740. doi: 10.3390/microorganisms8111740 (PMC7716237; doi:10.3390/microorganisms8111740)
Supplement: Supplementary file 1 [file microorganisms-08-01740-s001.zip › Supplementary_Table_5.xlsx]

## Sheet: Hoja1
Supplementary Table 5. Percentage of Pseudomonas genomes containing an ortholog of extracellular matrix components.
ECM component	Protein	Orthogroup	Percentage of genomes in each group/subgroup
			P. aeruginosa	P. stutzeri	P. putida	P. syringae	P. fragi	P. gessardii	P. fluorescens	P. protegens	P. chlororaphis	P. asplenii	P. corrugata	P. koreensis	P. jessenii	P. mandelii
Alginate	AlgD	OG0000074	100	33.3333	98.2456	100	100	100	100	100	100	100	100	100	100	100
	Alg8	OG0002715	99.6212	0	92.9825	100	33.3333	100	100	100	100	100	100	100	100	100
	Alg44	OG0002720	98.4848	0	94.7368	100	33.3333	100	100	100	100	100	100	100	100	100
	AlgK	OG0002876	98.8636	0	94.7368	100	33.3333	100	100	100	100	100	100	100	100	100
	AlgE	OG0002865	100	0	94.7368	100	33.3333	100	100	90.9091	98.0392	100	100	100	100	100
	AlgG	OG0002922	97.3485	0	92.9825	100	33.3333	100	100	90.9091	100	100	100	100	100	100
	AlgX	OG0002724	99.2424	0	94.7368	100	33.3333	100	100	90.9091	100	100	100	100	100	100
	AlgL	OG0002710	99.2424	0	92.9825	100	33.3333	100	100	100	100	100	100	100	100	100
	AlgI	OG0000682	98.8636	85.7143	96.4912	100	77.7778	100	100	90.9091	100	100	100	100	100	100
	AlgJ	OG0000939	98.1061	0	94.7368	100	77.7778	100	100	72.7273	100	100	100	100	100	100
	AlgF	OG0002812	95.8333	0	96.4912	100	33.3333	100	100	100	98.0392	100	100	100	100	100
	AlgA	OG0000714	99.2424	100	94.7368	100	44.4444	100	100	100	100	100	100	100	100	100
Levan	LscA	OG0005528	0	0	0	94.1176	0	0	54.902	0	98.0392	0	75	0	0	0
Pap	PapA	OG0000074	100	33.3333	98.2456	100	100	100	100	100	100	100	100	100	100	100
	PapB	OG0000128	100	100	100	100	100	100	82.3529	100	100	100	100	100	100	100
	PapC	OG0000489	93.1818	100	98.2456	100	77.7778	100	100	100	100	100	100	100	100	88.8889
	PapD	OG0006338	0	9.52381	19.2982	0	0	0	0	100	86.2745	0	100	100	40	66.6667
	PapE	OG0006267	0	14.2857	26.3158	0	0	0	0	90.9091	86.2745	0	100	100	40	77.7778
	PapF	OG0006353	0	14.2857	19.2982	0	0	0	0	90.9091	86.2745	0	100	100	40	66.6667
	PapG	OG0000286	100	66.6667	100	96.0784	100	40	100	100	100	100	100	100	100	100
	PapH	OG0006337	0	14.2857	19.2982	0	0	0	0	100	86.2745	0	100	100	40	66.6667
	PapI	OG0006318	0	19.0476	19.2982	0	0	0	1.96078	81.8182	86.2745	0	100	100	40	66.6667
	PapJ	OG0006336	0	14.2857	19.2982	0	0	0	0	90.9091	86.2745	0	100	100	40	66.6667
	PapK	OG0003870	96.2121	14.2857	19.2982	0	0	0	0	100	86.2745	0	95	100	40	66.6667
	PapL	OG0006335	0	14.2857	19.2982	0	0	0	0	100	86.2745	0	100	100	40	66.6667
	PapM	OG0006375	0	14.2857	19.2982	0	0	0	0	90.9091	86.2745	0	95	100	40	66.6667
	PapN	OG0005875	0	14.2857	19.2982	0	0	0	0	100	86.2745	0	95	100	40	66.6667
	PapO	OG0006352	0	14.2857	19.2982	0	0	0	0	90.9091	86.2745	0	100	100	40	66.6667
	PapP	OG0006374	0	14.2857	17.5439	0	0	20	0	100	86.2745	0	95	78.5714	60	66.6667
Pea	PP_3132	OG0007787	0	0	78.9474	0	0	0	0	0	0	0	5	0	40	22.2222
	PP_3133	OG0007552	0.757576	0	78.9474	3.92157	0	0	3.92157	0	1.96078	0	0	0	40	33.3333
	PP_3134	OG0000122	100	100	100	100	55.5556	60	72.549	100	100	100	80	21.4286	80	55.5556
	PP_3135	OG0006159	4.92424	100	80.7018	0	0	0	7.84314	90.9091	0	0	65	0	40	22.2222
	PP_3136	OG0000731	100	100	100	100	100	100	98.0392	90.9091	98.0392	100	100	100	100	100
	PP_3137	OG0007885	0	0	80.7018	0	0	0	0	0	0	0	0	0	60	22.2222
	PP_3138	OG0007942	0	0	78.9474	0	0	0	0	0	0	0	0	0	40	22.2222
	PP_3139	OG0004199	66.2879	9.52381	85.9649	0	33.3333	0	37.2549	27.2727	13.7255	66.6667	10	7.14286	20	33.3333
	PP_3140	OG0007943	0	0	80.7018	0	0	0	0	0	0	0	0	0	40	22.2222
	PP_3141	OG0006496	0	100	78.9474	0	33.3333	0	1.96078	0	0	0	0	0	40	22.2222
	PP_3142	OG0000489	93.1818	100	98.2456	100	77.7778	100	100	100	100	100	100	100	100	88.8889
Peb	PP_1788	OG0015633	0	0	12.2807	0	0	0	0	0	0	0	0	0	0	0
	PP_1789	OG0010678	0	9.52381	21.0526	0	0	0	3.92157	0	0	0	0	0	0	0
	PP_1790	OG0005891	6.81818	23.8095	21.0526	0	11.1111	0	5.88235	90.9091	100	100	45	100	20	66.6667
	PP_1791	OG0004511	19.3182	47.619	50.8772	86.2745	88.8889	0	17.6471	9.09091	60.7843	100	10	14.2857	100	22.2222
	PP_1792	OG0000505	96.2121	23.8095	84.2105	100	33.3333	0	17.6471	90.9091	98.0392	100	85	100	60	88.8889
	PP_1793	OG0008268	0	0	33.3333	37.2549	0	0	0	0	0	0	0	7.14286	20	11.1111
	PP_1794	OG0008155	0	0	36.8421	37.2549	0	0	0	0	0	0	0	0	20	11.1111
	PP_1795	OG0009038	0	0	35.0877	23.5294	0	0	0	0	0	0	0	0	20	11.1111
Pel	PelA	OG0004334	100	0	0	0	11.1111	0	21.5686	100	3.92157	33.3333	0	7.14286	40	44.4444
	PelB	OG0004299	99.6212	0	3.50877	0	11.1111	0	21.5686	90.9091	3.92157	33.3333	5	14.2857	40	44.4444
	PelC	OG0004330	100	0	0	0	11.1111	0	21.5686	90.9091	3.92157	33.3333	0	7.14286	40	44.4444
	PelD	OG0004367	99.2424	0	0	0	11.1111	0	21.5686	81.8182	3.92157	33.3333	0	7.14286	40	44.4444
	PelE	OG0004350	99.2424	0	0	0	11.1111	0	21.5686	100	3.92157	33.3333	0	7.14286	40	44.4444
	PelF	OG0004480	95.4545	0	0	0	0	0	21.5686	81.8182	3.92157	33.3333	0	7.14286	40	44.4444
	PelG	OG0004445	95.8333	0	0	0	11.1111	0	21.5686	90.9091	3.92157	33.3333	0	7.14286	40	44.4444
PNAG	PgaA	OG0005753	0	0	0	0	0	100	98.0392	90.9091	100	0	100	100	0	44.4444
	PgaB	OG0005712	0	0	0	0	0	100	100	81.8182	100	0	100	100	0	55.5556
	PgaC	OG0000083	100	100	57.8947	100	100	100	100	100	100	100	100	100	60	100
	PgaD	OG0005754	0	0	0	0	0	100	100	81.8182	100	0	100	100	0	44.4444
Psl	PslA	OG0000489	93.1818	100	98.2456	100	77.7778	100	100	100	100	100	100	100	100	88.8889
	PslB	OG0000490	100	4.7619	49.1228	100	100	60	96.0784	90.9091	100	100	75	100	60	77.7778
	PslC	OG0003591	94.3182	0	0	100	11.1111	60	92.1569	90.9091	100	66.6667	0	0	0	0
	PslD	OG0000855	93.1818	100	75.4386	100	77.7778	100	100	90.9091	100	100	0	100	100	66.6667
	PslE	OG0003594	95.0758	0	0	98.0392	11.1111	60	92.1569	81.8182	100	66.6667	0	0	0	0
	PslF	OG0003588	95.4545	0	0	100	11.1111	60	92.1569	81.8182	98.0392	66.6667	0	0	0	0
	PslG	OG0003595	93.9394	0	0	100	11.1111	60	92.1569	63.6364	100	66.6667	0	0	0	0
	PslH	OG0000636	94.3182	0	87.7193	100	100	100	100	100	100	100	100	100	100	100
	PslI	OG0003581	94.697	0	0	100	11.1111	60	92.1569	72.7273	100	66.6667	0	7.14286	20	0
	PslJ	OG0003570	96.2121	0	0	100	11.1111	60	92.1569	90.9091	100	66.6667	0	0	0	0
	PslK	OG0003593	95.8333	0	0	98.0392	11.1111	60	90.1961	81.8182	100	66.6667	0	0	0	0
	PslL	OG0004426	96.9697	0	0	0	0	0	62.7451	0	0	0	0	0	0	0
	PslM	OG0000983	88.2576	19.0476	70.1754	0	100	0	15.6863	81.8182	96.0784	0	20	64.2857	80	55.5556
	PslN	OG0003097	96.9697	90.4762	94.7368	100	22.2222	80	94.1176	81.8182	37.2549	66.6667	100	100	100	88.8889
	PslO	OG0005128	96.9697	0	0	0	0	0	0	0	0	0	0	0	0	0
Cellulose	WwsAJ	OG0005782	0	42.8571	42.1053	52.9412	88.8889	60	64.7059	0	0	100	15	0	60	33.3333
	WssB	OG0006381	0	42.8571	38.5965	54.902	77.7778	0	23.5294	0	0	100	15	0	60	33.3333
	WssC	OG0006495	0	42.8571	42.1053	37.2549	88.8889	0	23.5294	0	0	100	15	0	60	33.3333
	WssD	OG0006623	0	0	42.1053	54.902	77.7778	0	23.5294	0	0	100	15	0	60	33.3333
	WssE	OG0006447	0	42.8571	42.1053	39.2157	77.7778	0	23.5294	0	0	100	15	0	60	33.3333
	WssF	OG0007588	0	0	1.75439	43.1373	55.5556	0	23.5294	0	0	100	15	0	20	22.2222
	WssG	OG0007473	0	0	5.26316	43.1373	55.5556	0	23.5294	0	0	100	15	0	20	66.6667
	WssH	OG0000682	98.8636	85.7143	96.4912	100	77.7778	100	100	90.9091	100	100	100	100	100	100
	WssI	OG0000939	98.1061	0	94.7368	100	77.7778	100	100	72.7273	100	100	100	100	100	100
Cdr	CdrA	OG0005200	87.5	0	0	0	0	0	0	0	0	0	0	0	0	0
	CdrB	OG0003511	96.5909	0	82.4561	0	66.6667	60	68.6275	90.9091	98.0392	0	0	100	60	22.2222
MapA	MapB	OG0000572	100	28.5714	100	5.88235	44.4444	100	68.6275	90.9091	100	66.6667	100	100	100	88.8889
	MapC	OG0000584	99.2424	23.8095	100	5.88235	44.4444	100	64.7059	90.9091	100	33.3333	100	100	100	88.8889
	MapE	OG0000646	97.3485	23.8095	100	5.88235	33.3333	100	68.6275	100	100	33.3333	100	100	100	100
	MapA	OG0005882	0	23.8095	31.5789	3.92157	0	60	0	9.09091	96.0784	0	90	100	100	77.7778
LapA	LapG	OG0000538	97.3485	14.2857	98.2456	100	100	100	100	9.09091	100	100	100	100	100	100
	LapD	OG0002886	95.0758	28.5714	98.2456	0	0	100	66.6667	100	100	0	95	100	100	100
	PSF113_0207	OG0005172	0	28.5714	98.2456	0	0	100	68.6275	100	100	0	95	100	100	88.8889
	LapA	OG0005483	0	4.7619	71.9298	0	0	100	62.7451	90.9091	92.1569	0	80	92.8571	0	55.5556
	LapE	OG0000646	97.3485	23.8095	100	5.88235	33.3333	100	68.6275	100	100	33.3333	100	100	100	100
	LapB	OG0000584	99.2424	23.8095	100	5.88235	44.4444	100	64.7059	90.9091	100	33.3333	100	100	100	88.8889
	LapC	OG0000572	100	28.5714	100	5.88235	44.4444	100	68.6275	90.9091	100	66.6667	100	100	100	88.8889
LapF	PP_0798	OG0000057	100	95.2381	100	100	100	100	100	100	100	66.6667	100	100	100	100
	PP_0799	OG0000026	100	71.4286	100	100	100	100	100	100	100	66.6667	85	100	100	100
	PP_0800	OG0004574	0	0	92.9825	98.0392	0	100	100	90.9091	100	100	100	100	100	100
	PP_0801	OG0003476	97.7273	0	96.4912	43.1373	11.1111	0	5.88235	90.9091	98.0392	100	95	100	100	100
	PP_0802	OG0004277	0	33.3333	100	98.0392	100	100	100	90.9091	100	100	100	100	100	100
	LapJ	OG0000572	100	28.5714	100	5.88235	44.4444	100	68.6275	90.9091	100	66.6667	100	100	100	88.8889
	LapI	OG0000584	99.2424	23.8095	100	5.88235	44.4444	100	64.7059	90.9091	100	33.3333	100	100	100	88.8889
	LapH	OG0000646	97.3485	23.8095	100	5.88235	33.3333	100	68.6275	100	100	33.3333	100	100	100	100
	LapF	OG0003685	88.2576	0	56.1404	0	22.2222	20	13.7255	0	78.4314	33.3333	0	35.7143	0	0
Fap	FapA	OG0003317	94.3182	0	98.2456	0	66.6667	100	100	100	100	0	95	100	100	100
	FapB	OG0003294	95.0758	0	98.2456	0	77.7778	100	100	90.9091	100	0	100	100	100	100
	FapC	OG0003307	95.4545	0	98.2456	0	66.6667	100	100	100	96.0784	0	95	100	100	100
	FapD	OG0000548	100	0	98.2456	0	77.7778	100	100	90.9091	100	66.6667	100	100	100	100
	FapE	OG0003335	94.3182	0	96.4912	0	66.6667	100	94.1176	90.9091	100	0	100	100	100	100
	FapF	OG0003278	96.5909	0	96.4912	0	66.6667	100	98.0392	90.9091	98.0392	66.6667	95	100	100	100
PsmE	PsmE	OG0005673	0	0	10.5263	98.0392	0	0	0	0	0	100	100	7.14286	40	55.5556
	PSF113_3005	OG0000396	100	0	63.1579	98.0392	66.6667	100	96.0784	100	98.0392	100	100	92.8571	60	100
	PSF113_3006	OG0000273	100	4.7619	84.2105	98.0392	77.7778	100	98.0392	100	100	100	100	92.8571	60	100
	PSF113_3007	OG0000280	99.2424	4.7619	82.4561	98.0392	77.7778	100	98.0392	100	100	100	100	92.8571	60	100
Flp/Tad type B	RcpA	OG0002909	99.6212	33.3333	35.0877	98.0392	77.7778	100	82.3529	90.9091	94.1176	100	100	100	100	77.7778
	TadD	OG0003252	99.2424	0	31.5789	98.0392	100	60	80.3922	100	100	66.6667	100	100	100	77.7778
	PSF113_4180	OG0003239	99.6212	0	31.5789	98.0392	88.8889	60	82.3529	100	100	66.6667	100	100	100	77.7778
	TadC	OG0002752	99.6212	33.3333	35.0877	98.0392	88.8889	60	80.3922	100	100	66.6667	100	100	100	77.7778
	TadB	OG0002733	100	33.3333	35.0877	96.0784	88.8889	60	82.3529	90.9091	100	66.6667	100	100	100	77.7778
	TadA	OG0002636	100	33.3333	35.0877	98.0392	100	60	82.3529	90.9091	100	66.6667	100	100	100	77.7778
	TadZ	OG0006756	0	28.5714	3.50877	0	33.3333	0	0	0	100	0	100	0	0	33.3333
	TadF	OG0006778	0	28.5714	3.50877	0	33.3333	0	0	0	100	0	100	0	0	33.3333
	TadE	OG0006735	0	28.5714	3.50877	0	33.3333	0	0	0	100	0	100	0	0	33.3333
	TadG	OG0006796	0	28.5714	3.50877	0	33.3333	0	0	0	96.0784	0	100	0	0	33.3333
	RcpC	OG0002768	99.6212	33.3333	35.0877	98.0392	77.7778	60	82.3529	90.9091	98.0392	66.6667	100	100	100	77.7778
	PSF113_4189	OG0006797	0	28.5714	3.50877	0	33.3333	0	0	0	100	0	95	0	0	33.3333
	TadV	OG0006723	0	28.5714	3.50877	1.96078	33.3333	0	0	0	100	0	100	0	0	33.3333
	Flp-2/Flp-1	OG0005714	0	28.5714	3.50877	0	33.3333	0	0	0	100	0	100	0	0	33.3333
Flp/Tad type A	PprA	OG0003362	98.8636	0	35.0877	96.0784	88.8889	60	82.3529	90.9091	100	66.6667	0	100	100	77.7778
	TadF	OG0003352	99.6212	0	31.5789	98.0392	88.8889	60	82.3529	100	100	66.6667	0	100	100	77.7778
	FppA	OG0003101	100	0	100	98.0392	100	60	82.3529	100	100	66.6667	0	100	100	77.7778
	PprB	OG0003146	97.7273	0	100	100	100	60	82.3529	100	100	66.6667	0	100	100	77.7778
	TadG	OG0003330	99.6212	0	31.5789	98.0392	88.8889	40	82.3529	90.9091	96.0784	66.6667	0	100	100	77.7778
	PA4298	OG0003239	99.6212	0	31.5789	98.0392	88.8889	60	82.3529	100	100	66.6667	100	100	100	77.7778
	TadD	OG0003252	99.2424	0	31.5789	98.0392	100	60	80.3922	100	100	66.6667	100	100	100	77.7778
	TadC	OG0002752	99.6212	33.3333	35.0877	98.0392	88.8889	60	80.3922	100	100	66.6667	100	100	100	77.7778
	TadB	OG0002733	100	33.3333	35.0877	96.0784	88.8889	60	82.3529	90.9091	100	66.6667	100	100	100	77.7778
	TadA	OG0002636	100	33.3333	35.0877	98.0392	100	60	82.3529	90.9091	100	66.6667	100	100	100	77.7778
	TadZ	OG0003363	99.6212	0	31.5789	98.0392	88.8889	60	82.3529	100	96.0784	66.6667	0	100	100	77.7778
	RcpA	OG0002909	99.6212	33.3333	35.0877	98.0392	77.7778	100	82.3529	90.9091	94.1176	100	100	100	100	77.7778
	RcpC	OG0002768	99.6212	33.3333	35.0877	98.0392	77.7778	60	82.3529	90.9091	98.0392	66.6667	100	100	100	77.7778
	Flp	OG0003247	100	0	31.5789	98.0392	88.8889	60	82.3529	100	100	66.6667	0	100	100	77.7778
